# Supplementary material for: Proteomic Responses Under Cold Stress Reveal Unique Cold Tolerance Mechanisms in the Pacific White Shrimp (Litopenaeus vannamei)
Source: Front Physiol. 2018 Nov 13;9:1399. doi: 10.3389/fphys.2018.01399 (PMC6243039; doi:10.3389/fphys.2018.01399)
Supplement: TABLE S2 — Protein accession and description of 3,349 identified proteins in proteomics analysis of GH1 and GH2 under different temperature treatments. [file Data_Sheet_2.XLSX]

## Sheet: Sheet1
Protein accession	Protein description	MW [kDa]	GH2-28-1	GH2-28-2	GH2-16-1	GH2-16-2	GH2-R-1	GH2-R-2	GH1-28-1	GH1-28-2	GH1-16-1	GH1-16-2	GH1-R-1	GH1-R-2	Subcellular Location	Biological Process	Cellular Component	Molecular Function	KEGG KO No.	KEGG Gene	KEGG pathway	IPR ID	Domain description
CL10011Contig1_orf1	40S ribosomal protein S26-like	16.01	0.828629	1.14864	1.41901	1.18821	1.17607	1.17612	0.705341	0.727933	0.750873	0.71363	0.780435	0.76458	cytosol	cellular protein metabolic process; biosynthetic process; primary metabolic process; cellular metabolic process; organic substance biosynthetic process; cellular biosynthetic process; organic substance metabolic process; metabolic process; cellular macromolecule biosynthetic process; cellular macromolecule metabolic process; gene expression; macromolecule metabolic process; protein metabolic proc…	ribosome; organelle; intracellular organelle; intracellular non-membrane-bounded organelle; cell part; intracellular; cytoplasm; macromolecular complex; intracellular part; cell; ribonucleoprotein complex; cytoplasmic part; non-membrane-bounded organelle;	structural constituent of ribosome; structural molecule activity;	K02976	RP-S26e; small subunit ribosomal protein S26e	ko03010 Ribosome;
CL10015Contig1_orf1	ribosomal protein L36	13.543	1.01404	0.970361	1.0978	1.14208	1.24153	1.0898	0.66319	0.788791	0.969519	0.921404	0.83328	0.925539	mitochondria	cellular protein metabolic process; biosynthetic process; primary metabolic process; cellular metabolic process; organic substance biosynthetic process; cellular biosynthetic process; organic substance metabolic process; metabolic process; cellular macromolecule biosynthetic process; cellular macromolecule metabolic process; gene expression; macromolecule metabolic process; protein metabolic proc…	ribosome; organelle; intracellular organelle; intracellular non-membrane-bounded organelle; cell part; intracellular; cytoplasm; macromolecular complex; intracellular part; cell; ribonucleoprotein complex; cytoplasmic part; non-membrane-bounded organelle;	structural constituent of ribosome; structural molecule activity;	K02920	RP-L36e; large subunit ribosomal protein L36e	ko03010 Ribosome;
CL10016Contig2_orf1	hematopoietic prostaglandin D synthase	23.544	1.15932	1.4557	0.81009	0.497138	0.970756	1.34842	1.15086	0.858085	0.793664	0.663659	1.20545	1.14229	cytosol, nuclear			protein binding; binding;	K04097	HPGDS; prostaglandin-H2 D-isomerase / glutathione transferase [EC:5.3.99.2 2.5.1.18]	ko00980 Metabolism of xenobiotics by cytochrome P450; ko00590 Arachidonic acid metabolism; ko00982 Drug metabolism - cytochrome P450; ko00480 Glutathione metabolism; ko01100 Metabolic pathways; ko05204 Chemical carcinogenesis;	IPR004046; IPR010987; IPR012336; IPR004045;	Glutathione S-transferase, C-terminal; Glutathione S-transferase, C-terminal-like; Thioredoxin-like fold; Glutathione S-transferase, N-terminal;
CL10017Contig1_orf1	cytochrome P450 monooxygenase	62.168	0.738305	0.837835	1.28976	1.13794	1.3966	1.09966	0.676294	0.824972	0.829373	1.02788	0.696079	0.774478	cytosol, nuclear	single-organism process; metabolic process; oxidation-reduction process; single-organism metabolic process;		organic cyclic compound binding; heterocyclic compound binding; heme binding; iron ion binding; transition metal ion binding; catalytic activity; binding; ion binding; cation binding; metal ion binding; oxidoreductase activity, acting on paired donors, with incorporation or reduction of molecular oxygen; tetrapyrrole binding; oxidoreductase activity;	K14937	CYP15A1_C1; methyl farnesoate epoxidase / farnesoate epoxidase [EC:1.14.13.202 1.14.13.203]	ko00981 Insect hormone biosynthesis;
CL10027Contig1_orf1	alanine--tRNA ligase, cytoplasmic isoform X1	136.42	1.01961	1.00028	1.22491	1.23548	0.952947	1.01862	0.706227	0.681459	1.01321	1.0536	0.918759	0.83934	mitochondria	cellular aromatic compound metabolic process; cellular protein metabolic process; single-organism process; biosynthetic process; tRNA aminoacylation; cellular metabolic process; organic substance metabolic process; metabolic process; cellular amino acid metabolic process; heterocycle metabolic process; nucleobase-containing compound metabolic process; cellular nitrogen compound metabolic process;…	intracellular part; cell; cell part; intracellular; cytoplasm;	ligase activity, forming aminoacyl-tRNA and related compounds; ATP binding; nucleoside phosphate binding; ligase activity, forming carbon-oxygen bonds; nucleoside binding; ion binding; ligase activity; nucleotide binding; organic cyclic compound binding; heterocyclic compound binding; ribonucleoside binding; carbohydrate derivative binding; catalytic activity; ribonucleotide binding; binding; nuc…	K01872	AARS; alanyl-tRNA synthetase [EC:6.1.1.7]	ko00970 Aminoacyl-tRNA biosynthesis;	IPR018163; IPR004046; IPR018162; IPR018165; IPR012947; IPR018164; IPR003156; IPR010987; IPR012336; IPR009000;	Threonyl/alanyl tRNA synthetase, class II-like, putative editing domain; Glutathione S-transferase, C-terminal; Alanine-tRNA ligase, class IIc, anti-codon-binding domain; Alanyl-tRNA synthetase, class IIc, core domain; Threonyl/alanyl tRNA synthetase, SAD; Alanyl-tRNA synthetase, class IIc, N-terminal; DHHA1 domain; Glutathione S-transferase, C-terminal-like; Thioredoxin-like fold; Translation pr…
CL10028Contig1_orf1	P3 protein, partial	53.89	0.683991	0.747054	0.642129	0.596863	0.799971	0.757534	1.26741	1.21991	1.67043	1.80961	1.24365	1.30143	plasma membrane		membrane;
CL10031Contig1_orf1	mitochondrial MnSOD	26.458	0.699373	0.764644	1.15827	1.06026	1.25714	1.00448	0.752652	0.847177	0.899216	1.11024	1.04164	1.19346	cytosol	superoxide metabolic process; metabolic process; reactive oxygen species metabolic process; oxidation-reduction process; single-organism metabolic process; single-organism process; cellular process; cellular metabolic process;		superoxide dismutase activity; catalytic activity; oxidoreductase activity, acting on superoxide radicals as acceptor; binding; ion binding; antioxidant activity; cation binding; metal ion binding; oxidoreductase activity;	K04564	SOD2; superoxide dismutase, Fe-Mn family [EC:1.15.1.1]	ko04013 MAPK signaling pathway - fly; ko04211 Longevity regulating pathway; ko04068 FoxO signaling pathway; ko04212 Longevity regulating pathway - worm; ko04146 Peroxisome; ko05016 Huntington's disease; ko04213 Longevity regulating pathway - multiple species;	IPR019831; IPR019832;	Manganese/iron superoxide dismutase, N-terminal; Manganese/iron superoxide dismutase, C-terminal;
CL10032Contig1_orf1	hypothetical protein DAPPUDRAFT_231787	39.416	0.866095	0.811805	1.14243	1.10572	1.22949	1.24148	0.714941	0.681429	1.06582	1.04515	0.830834	0.803205	cytosol			hydrolase activity; catalytic activity;	K06269	PPP1C; serine/threonine-protein phosphatase PP1 catalytic subunit [EC:3.1.3.16]	ko04261 Adrenergic signaling in cardiomyocytes; ko05205 Proteoglycans in cancer; ko05034 Alcoholism; ko04810 Regulation of actin cytoskeleton; ko04390 Hippo signaling pathway; ko04270 Vascular smooth muscle contraction; ko04114 Oocyte meiosis; ko04750 Inflammatory mediator regulation of TRP channels; ko04921 Oxytocin signaling pathway; ko03015 mRNA surveillance pathway; ko04720 Long-term potentia…	IPR029052; IPR004843; IPR031675; IPR006186;	Metallo-dependent phosphatase-like; Calcineurin-like phosphoesterase domain, ApaH type; Serine-threonine protein phosphatase, N-terminal; Serine/threonine-specific protein phosphatase/bis(5-nucleosyl)-tetraphosphatase;
CL10037Contig1_orf1	phosphopyruvate hydratase	50.554	0.786528	0.776864	1.19431	1.11577	1.52361	1.42416	0.49269	0.605894	0.652218	0.637511	0.606454	0.795103	cytosol	single-organism carbohydrate catabolic process; glycolytic process; single-organism catabolic process; small molecule metabolic process; single-organism cellular process; single-organism process; carbohydrate metabolic process; primary metabolic process; cellular metabolic process; organic substance metabolic process; carbohydrate catabolic process; single-organism carbohydrate metabolic process;…	catalytic complex; cell part; intracellular; cytoplasm; macromolecular complex; intracellular part; cytosolic part; cell; cytosol; protein complex; phosphopyruvate hydratase complex; cytoplasmic part;	magnesium ion binding; phosphopyruvate hydratase activity; catalytic activity; binding; ion binding; metal ion binding; cation binding; lyase activity; hydro-lyase activity; carbon-oxygen lyase activity;	K01689	ENO; enolase [EC:4.2.1.11]	ko01130 Biosynthesis of antibiotics; ko01110 Biosynthesis of secondary metabolites; ko01230 Biosynthesis of amino acids; ko01100 Metabolic pathways; ko00680 Methane metabolism; ko01120 Microbial metabolism in diverse environments; ko01200 Carbon metabolism; ko00010 Glycolysis / Gluconeogenesis; ko03018 RNA degradation; ko04066 HIF-1 signaling pathway;	IPR029065; IPR020810; IPR029017; IPR020811;	Enolase C-terminal domain-like; Enolase, C-terminal TIM barrel domain; Enolase N-terminal domain-like; Enolase, N-terminal;
CL10038Contig1_orf1	hypothetical protein BRAFLDRAFT_86827	70.774	1.63559	1.64544	0.641109	0.676399	0.667769	0.663241	1.24726	1.29636	1.04518	1.06625	1.00104	1.00174	plasma membrane
CL1003Contig2_orf2	hypothetical protein EAI_16569	59.909	0.963322	0.953103	1.04141	1.00239	0.940774	1.09977	1.04366	0.836907	0.756495	0.748529	1.25235	1.35047	nuclear
CL1003Contig7_orf1	hypothetical protein L798_10429	52.388		0.96691		1.04769		1.15612		0.789669		0.773616		1.11443	nuclear
CL10043Contig1_orf1	ribosomal protein S9	24.074	0.900914	0.947787	0.962839	0.822223	0.933542	1.23556	1.10448	0.630047	1.19342	1.48205	0.976581	0.627018	cytosol	cellular protein metabolic process; biosynthetic process; primary metabolic process; cellular metabolic process; organic substance biosynthetic process; cellular biosynthetic process; organic substance metabolic process; metabolic process; cellular macromolecule biosynthetic process; cellular macromolecule metabolic process; gene expression; macromolecule metabolic process; protein metabolic proc…	intracellular organelle; ribosome; intracellular non-membrane-bounded organelle; small ribosomal subunit; cytoplasm; intracellular organelle part; macromolecular complex; intracellular part; cell; organelle part; non-membrane-bounded organelle; organelle; cell part; intracellular; ribosomal subunit; ribonucleoprotein complex; cytoplasmic part;	organic cyclic compound binding; heterocyclic compound binding; RNA binding; binding; nucleic acid binding; structural molecule activity; structural constituent of ribosome; rRNA binding;	K02997	RP-S9e; small subunit ribosomal protein S9e	ko03010 Ribosome;	IPR001912; IPR002942;	Ribosomal protein S4/S9, N-terminal; RNA-binding S4 domain;
CL10046Contig1_orf1	Phosphoacetylglucosamine mutase	58.926	0.793933	0.89126	1.3773	1.29932	1.1692	1.05006	0.727327	0.75823	0.735884	0.768542	0.92732	1.01576	cytosol	metabolic process; carbohydrate metabolic process; primary metabolic process; organic substance metabolic process;		magnesium ion binding; isomerase activity; phosphoacetylglucosamine mutase activity; catalytic activity; binding; intramolecular transferase activity, phosphotransferases; ion binding; metal ion binding; cation binding; intramolecular transferase activity;	K01836	PGM3; phosphoacetylglucosamine mutase [EC:5.4.2.3]	ko01130 Biosynthesis of antibiotics; ko01100 Metabolic pathways; ko00520 Amino sugar and nucleotide sugar metabolism;	IPR005843; IPR016055; IPR005844;	Alpha-D-phosphohexomutase, C-terminal; Alpha-D-phosphohexomutase, alpha/beta/alpha I/II/III; Alpha-D-phosphohexomutase, alpha/beta/alpha domain I;
CL10059Contig1_orf1	endoplasmic reticulum lectin 1 isoform X2	64.786	0.822699	0.752356	1.46118	1.46239	1.39969	1.53457	0.446259	0.502917	0.88096	0.624683	0.565972	0.451706	endoplasmic reticulum				K14008	ERLEC1; endoplasmic reticulum lectin 1	ko04141 Protein processing in endoplasmic reticulum;	IPR009011; IPR012913;	Mannose-6-phosphate receptor binding domain; Glucosidase II beta subunit-like;
CL10063Contig1_orf1	ester hydrolase C11orf54 homolog	33.781	0.846449	0.870824	0.922505	0.906504	1.31483	1.30723	0.778151	0.782701	0.796661	0.803028	1.16256	1.17237	cytosol		organelle; intracellular membrane-bounded organelle; intracellular organelle; nucleus; cell part; intracellular; intracellular part; membrane-bounded organelle; cell;					IPR015021;	Domain of unknown function DUF1907;
CL10067Contig1_orf1	mitochondrial cytochrome c oxidase subunit Vb	16.502	1.08753	0.980743	1.39852	1.45527	1.23257	1.17013	0.423721	0.645095	0.589418	0.67839	0.547919	0.719234	extracellular		intracellular organelle; mitochondrial part; organelle envelope; intracellular organelle part; cytoplasm; intracellular part; cell; mitochondrion; organelle part; intracellular membrane-bounded organelle; mitochondrial envelope; organelle; cell part; intracellular; envelope; membrane-bounded organelle; cytoplasmic part;	ion transmembrane transporter activity; substrate-specific transporter activity; monovalent inorganic cation transmembrane transporter activity; oxidoreductase activity, acting on a heme group of donors, oxygen as acceptor; oxidoreductase activity, acting on a heme group of donors; hydrogen ion transmembrane transporter activity; heme-copper terminal oxidase activity; oxidoreductase activity; sub…	K02265	COX5B; cytochrome c oxidase subunit 5b	ko04260 Cardiac muscle contraction; ko05010 Alzheimer's disease; ko00190 Oxidative phosphorylation; ko01100 Metabolic pathways; ko05016 Huntington's disease; ko04932 Non-alcoholic fatty liver disease (NAFLD); ko05012 Parkinson's disease;
CL10068Contig1_orf1	snare protein sec22	27.651	0.966453	0.899408	0.992702	1.19376	0.91902	1.13251	0.980599	0.825092	0.931978	0.766468	1.24146	0.979684	cytosol	transport; localization; vesicle-mediated transport; establishment of localization;	intrinsic component of membrane; membrane; integral component of membrane; membrane part;		K08517	SEC22; vesicle transport protein SEC22	ko04145 Phagosome; ko05134 Legionellosis; ko04130 SNARE interactions in vesicular transport;	IPR010908; IPR011012; IPR001388;	Longin domain; Longin-like domain; Synaptobrevin;
CL10079Contig1_orf1	C-type lectin	24.729	1.79344	1.74628	0.452875	0.443803	0.749842	0.674133	1.82726	1.97196	0.597026	0.689842	0.918695	0.955408	cytosol							IPR001304; IPR016187; IPR016186;	C-type lectin-like; C-type lectin fold; C-type lectin-like/link domain;
CL10080Contig2_orf1	Equilibrative nucleoside transporter 3	46.72	1.05499	0.957155	1.0411	1.04926	1.10323	1.15302	0.856025	0.794029	0.934193	0.87502	0.904991	1.01499	plasma membrane	transport; localization; establishment of localization;	intrinsic component of membrane; membrane; integral component of membrane; membrane part;	carbohydrate derivative transporter activity; substrate-specific transporter activity; nucleoside transmembrane transporter activity; transporter activity; transmembrane transporter activity; substrate-specific transmembrane transporter activity; nucleobase-containing compound transmembrane transporter activity;	K15014			IPR020846;	Major facilitator superfamily domain;
CL10081Contig1_orf1	protein disulfide isomerase 1	46.225	0.869482	0.831787	1.46004	1.39256	1.19059	1.12361	0.632531	0.712731	0.731181	0.858864	0.787768	0.901374	extracellular	regulation of cellular process; homeostatic process; regulation of biological quality; regulation of biological process; cell redox homeostasis; single-organism cellular process; cellular homeostasis; single-organism process; cellular process; biological regulation;		isomerase activity; catalytic activity;	K13984	TXNDC5; thioredoxin domain-containing protein 5	ko04141 Protein processing in endoplasmic reticulum;	IPR005788; IPR013766; IPR012336;	Disulphide isomerase; Thioredoxin domain; Thioredoxin-like fold;
CL10082Contig1_orf1	Heat shock protein 67B2, partial	21.24	1.10132	1.10952	1.76618	2.07699	0.955448	1.0668	0.513707	0.228233	0.615102	0.43303	0.650814	0.313198	mitochondria							IPR001763;	Rhodanese-like domain;
CL10083Contig1_orf1	OTU domain ubiquitin aldehyde binding protein	33.154	0.919523	0.877153	1.20104	1.34039	1.26673	1.3087	0.814894	0.667023	0.722214	0.625638	0.852467	0.763326	cytosol	protein modification by small protein removal; metabolic process; cellular protein metabolic process; cellular macromolecule metabolic process; cellular protein modification process; macromolecule metabolic process; protein metabolic process; protein modification by small protein conjugation or removal; macromolecule modification; protein modification process; primary metabolic process; protein d…		hydrolase activity; catalytic activity;	K09602			IPR003323;	OTU domain;
CL10088Contig1_orf1	GTP-binding protein SAR1B, putative	24.028	1.12315	0.908651	0.96992	1.11822	1.41529	1.26737	0.587011	0.720855	1.08173	0.812282	0.619565	0.861662	cytosol	establishment of protein localization; transport; intracellular transport; cellular macromolecule localization; establishment of localization in cell; intracellular protein transport; organic substance transport; protein localization; macromolecule localization; cellular protein localization; localization; protein transport; establishment of localization; cellular localization;	cell; intracellular; cell part;	nucleoside phosphate binding; nucleoside binding; ion binding; nucleotide binding; organic cyclic compound binding; heterocyclic compound binding; ribonucleoside binding; carbohydrate derivative binding; ribonucleotide binding; binding; purine ribonucleoside binding; anion binding; purine ribonucleotide binding; purine nucleoside binding; guanyl ribonucleotide binding; guanyl nucleotide binding; …	K07953	SAR1; GTP-binding protein SAR1 [EC:3.6.5.-]	ko04141 Protein processing in endoplasmic reticulum; ko05134 Legionellosis;	IPR005225; IPR027417;	Small GTP-binding protein domain; P-loop containing nucleoside triphosphate hydrolase;
CL10095Contig1_orf1	methyltransferase-like protein 7A	32.494	1.04207	1.09473	0.88591	1.01634	0.826181	0.964663	1.2197	0.981741	1.34675	1.11601	0.898662	0.76318	plasma membrane	metabolic process;		transferase activity, transferring one-carbon groups; methyltransferase activity; catalytic activity; transferase activity;				IPR029063; IPR013216;	S-adenosyl-L-methionine-dependent methyltransferase; Methyltransferase type 11;
CL10102Contig1_orf1	NADH dehydrogenase	24.661	1.05599	1.05682	1.29414	1.20675	0.975036	0.987012	0.836194	0.824353	0.787088	0.895788	0.899761	0.888377	extracellular	single-organism process; metabolic process; oxidation-reduction process; single-organism metabolic process;		oxidoreductase activity, acting on NAD(P)H; NADH dehydrogenase activity; catalytic activity; binding; iron-sulfur cluster binding; NADH dehydrogenase (quinone) activity; 4 iron, 4 sulfur cluster binding; cofactor binding; quinone binding; oxidoreductase activity, acting on NAD(P)H, quinone or similar compound as acceptor; NADH dehydrogenase (ubiquinone) activity; oxidoreductase activity; metal cl…	K03940	NDUFS7; NADH dehydrogenase (ubiquinone) Fe-S protein 7 [EC:1.6.5.3 1.6.99.3]	ko05010 Alzheimer's disease; ko00190 Oxidative phosphorylation; ko01100 Metabolic pathways; ko05016 Huntington's disease; ko04932 Non-alcoholic fatty liver disease (NAFLD); ko05012 Parkinson's disease;	IPR006137;	NADH:ubiquinone oxidoreductase-like, 20kDa subunit;
CL1010Contig3_orf1	AP-1 complex subunit beta-1 isoform X3	103.87	0.961037	0.972674	1.05365	1.01454	1.2624	1.1423	0.960471	1.05382	0.804706	0.78209	0.791073	0.932692	cytosol	establishment of protein localization; transport; intracellular transport; cellular macromolecule localization; establishment of localization in cell; vesicle-mediated transport; intracellular protein transport; organic substance transport; protein localization; macromolecule localization; cellular protein localization; localization; protein transport; establishment of localization; cellular loca…	membrane; AP-type membrane coat adaptor complex; membrane part; cell part; intracellular; clathrin adaptor complex; coated membrane; cytoplasm; clathrin coat; macromolecular complex; intracellular part; membrane coat; protein complex; cell; cytoplasmic part;	substrate-specific transporter activity; protein transporter activity; binding; transporter activity;	K12392	AP1B1; AP-1 complex subunit beta-1	ko04142 Lysosome;	IPR008152; IPR011989; IPR002553; IPR013037; IPR015151; IPR012295; IPR016024; IPR009028; IPR013041;	Clathrin adaptor, alpha/beta/gamma-adaptin, appendage, Ig-like subdomain; Armadillo-like helical; Clathrin/coatomer adaptor, adaptin-like, N-terminal; Clathrin adaptor, beta-adaptin, appendage, Ig-like subdomain; Beta-adaptin appendage, C-terminal subdomain; Beta2-adaptin/TBP, C-terminal domain; Armadillo-type fold; Coatomer/calthrin adaptor appendage, C-terminal subdomain; Coatomer/clathrin adap…
CL10111Contig1_orf1	malignant T-cell-amplified sequence 1 homolog	23.751	0.733733	0.664122	1.60196	1.4836	1.31639	1.3243	0.654304	0.708249	0.616706	0.636891	0.636925	0.713693	extracellular			organic cyclic compound binding; heterocyclic compound binding; RNA binding; binding; nucleic acid binding;	K07575			IPR015947; IPR002478; IPR004521;	PUA-like domain; PUA domain; Uncharacterised domain CHP00451;
CL10112Contig1_orf1	fatty acids binding protein	15.072	1.35426	1.56582	0.710876	0.580013	0.58963	0.598991	0.892307	0.787002	0.975104	0.903161	1.61318	1.85917	cytosol	transport; localization; establishment of localization;		lipid binding; binding; transporter activity;				IPR000463; IPR012674; IPR011038;	Cytosolic fatty-acid binding; Calycin; Calycin-like;
CL10117Contig1_orf1	ribonucleoside-diphosphate reductase subunit M2 isoform X1	44.545	1.08193		1.05068		1.36774		0.800986		0.715299		0.766705		cytosol	nucleotide biosynthetic process; cellular aromatic compound metabolic process; nucleotide metabolic process; single-organism process; biosynthetic process; deoxyribonucleotide metabolic process; cellular metabolic process; phosphate-containing compound metabolic process; organic substance metabolic process; deoxyribonucleotide biosynthetic process; metabolic process; carbohydrate derivative biosy…		catalytic activity; oxidoreductase activity;	K10808	RRM2; ribonucleoside-diphosphate reductase subunit M2 [EC:1.17.4.1]	ko04115 p53 signaling pathway; ko00230 Purine metabolism; ko00480 Glutathione metabolism; ko01100 Metabolic pathways; ko00240 Pyrimidine metabolism;	IPR012348; IPR009078;	Ribonucleotide reductase-related; Ferritin-like superfamily;
CL10122Contig1_orf1	very long-chain specific acyl-CoA dehydrogenase, mitochondrial	69.154	0.781836	0.778373	0.850567	0.809756	0.748797	0.824196	1.10351	1.09161	1.35795	1.41862	1.21447	1.19252	mitochondria	single-organism process; metabolic process; oxidation-reduction process; single-organism metabolic process;		nucleoside phosphate binding; flavin adenine dinucleotide binding; ion binding; nucleotide binding; cofactor binding; oxidoreductase activity; oxidoreductase activity, acting on the CH-CH group of donors; heterocyclic compound binding; organic cyclic compound binding; catalytic activity; binding; anion binding; acyl-CoA dehydrogenase activity; coenzyme binding; small molecule binding;	K09479	ACADVL; very long chain acyl-CoA dehydrogenase [EC:1.3.8.9]	ko00071 Fatty acid degradation; ko01212 Fatty acid metabolism; ko01100 Metabolic pathways;	IPR009100; IPR013786; IPR006091; IPR009075;	Acyl-CoA dehydrogenase/oxidase, N-terminal and middle domain; Acyl-CoA dehydrogenase/oxidase, N-terminal; Acyl-CoA oxidase/dehydrogenase, central domain; Acyl-CoA dehydrogenase/oxidase C-terminal;
CL10141Contig1_orf1	26S proteasome non-ATPase regulatory subunit 12	56.978	0.730707	0.696132	1.38411	1.36422	1.59343	1.55083	0.607788	0.531261	0.623636	0.621657	0.597147	0.620776	cytosol, nuclear			protein binding; binding;	K03035	PSMD12; 26S proteasome regulatory subunit N5	ko05169 Epstein-Barr virus infection; ko03050 Proteasome;	IPR011991; IPR000717;	Winged helix-turn-helix DNA-binding domain; Proteasome component (PCI) domain;
CL10142Contig1_orf1	mitotic checkpoint protein	39.07	0.72063	1.04193	1.46859	1.03578	1.5702	1.33033	0.598762	0.905891	0.562618	0.546504	0.584456	0.885008	cytosol			protein binding; binding;	K02180	BUB3; cell cycle arrest protein BUB3	ko04110 Cell cycle; ko05166 HTLV-I infection; ko04111 Cell cycle - yeast;	IPR017986; IPR015943;	WD40-repeat-containing domain; WD40/YVTN repeat-like-containing domain;
CL10145Contig1_orf1	eukaryotic translation initiation factor 3 subunit C	103.46	0.885463	0.904999	1.55285	1.56173	1.25387	1.17549	0.601544	0.585291	0.682564	0.664072	0.55183	0.611004	nuclear	cellular protein metabolic process; biosynthetic process; primary metabolic process; organic substance biosynthetic process; cellular metabolic process; cellular biosynthetic process; organic substance metabolic process; metabolic process; cellular macromolecule biosynthetic process; translational initiation; cellular macromolecule metabolic process; gene expression; macromolecule metabolic proce…	cell part; intracellular; cytoplasm; macromolecular complex; intracellular part; protein complex; cell; cytoplasmic part; eukaryotic translation initiation factor 3 complex;	organic cyclic compound binding; heterocyclic compound binding; RNA binding; translation factor activity, nucleic acid binding; translation initiation factor binding; binding; nucleic acid binding; translation initiation factor activity; protein binding;	K03252	EIF3C; translation initiation factor 3 subunit C	ko03013 RNA transport;	IPR011991; IPR000717; IPR008905;	Winged helix-turn-helix DNA-binding domain; Proteasome component (PCI) domain; Eukaryotic translation initiation factor 3 subunit C, N-terminal domain;
CL10148Contig1_orf1	low molecular weight phosphotyrosine protein phosphatase-like	18.028	0.878996	0.844649	1.26011	1.34615	1.05945	1.09599	0.870433	0.709104	0.900455	0.857486	0.87876	0.874753	cytosol	cellular protein metabolic process; primary metabolic process; protein dephosphorylation; dephosphorylation; cellular metabolic process; phosphate-containing compound metabolic process; organic substance metabolic process; metabolic process; phosphorus metabolic process; cellular macromolecule metabolic process; cellular protein modification process; protein metabolic process; macromolecule metab…	intracellular part; cell; cell part; intracellular; cytoplasm;	non-membrane spanning protein tyrosine phosphatase activity; hydrolase activity; phosphoprotein phosphatase activity; acid phosphatase activity; catalytic activity; phosphoric ester hydrolase activity; protein tyrosine phosphatase activity; phosphatase activity; hydrolase activity, acting on ester bonds;	K14394	ACP1; low molecular weight phosphotyrosine protein phosphatase [EC:3.1.3.2 3.1.3.48]	ko01100 Metabolic pathways; ko00730 Thiamine metabolism;	IPR023485;	Phosphotyrosine protein phosphatase I superfamily;
CL10149Contig1_orf1	arp2/3 complex 20 kd subunit	20.71	2.28596	1.82676	1.04137	1.03663	0.979433	0.975913	0.475437	0.686795	0.579211	0.657677	0.479629	0.63705	mitochondria	cellular component biogenesis; regulation of actin filament polymerization; regulation of cellular process; cellular component organization; Arp2/3 complex-mediated actin nucleation; regulation of biological quality; positive regulation of protein polymerization; regulation of actin cytoskeleton organization; actin filament organization; single-organism process; regulation of cellular component b…	intracellular organelle; intracellular non-membrane-bounded organelle; cytoskeletal part; intracellular organelle part; macromolecular complex; intracellular part; cell; actin cytoskeleton; organelle part; non-membrane-bounded organelle; organelle; cytoskeleton; Arp2/3 protein complex; cell part; intracellular; protein complex;		K05755	ARPC4; actin related protein 2/3 complex, subunit 4	ko05100 Bacterial invasion of epithelial cells; ko05132 Salmonella infection; ko04810 Regulation of actin cytoskeleton; ko05131 Shigellosis; ko05130 Pathogenic Escherichia coli infection; ko04666 Fc gamma R-mediated phagocytosis; ko04144 Endocytosis;
CL1014Contig4_orf1	Protein YIF1B-A	38.508	0.985383	0.997888	1.02865	1.03827	1.0531	1.0714	0.855892	0.804583	0.964581	0.946369	1.06135	1.04765	plasma membrane				K20362
CL10150Contig1_orf1	uncharacterized protein LOC105227403 isoform X2	9.9123	0.892873	0.916175	1.01136	1.00977	1.00583	0.954268	1.0616	1.10103	1.01579	0.951096	1.01831	1.08209	cytosol
CL10155Contig1_orf1	hypothetical protein YQE_12337, partial	20.191	0.796913	0.724298	0.950514	0.958876	1.19681	1.24622	0.988265	0.941029	1.19546	1.33178	0.827186	0.714187	plasma membrane
CL10156Contig1_orf1	integrin alpha-PS2-like	52.935	1.14314	0.967129	1.05779	1.22492	1.04898	1.08627	0.953482	0.70901	0.764949	0.879462	0.959292	0.916517	nuclear							IPR032695; IPR013649;	Integrin domain; Integrin alpha-2;
CL10174Contig1_orf1	Nodal modulator 3, partial	126.43	0.930354	0.888294	1.13928	1.13968	1.25024	1.26574	0.667071	0.685833	0.906216	0.826787	0.961924	0.90503	plasma membrane			carbohydrate binding; binding;				IPR013783; IPR014766; IPR013784;	Immunoglobulin-like fold; Carboxypeptidase, regulatory domain; Carbohydrate-binding-like fold;
CL10189Contig1_orf1	trafficking protein particle complex subunit 3	21.555	1.1784	1.16916	1.05845	1.03154	1.25807	1.10687	0.714129	0.863289	0.834703	0.842403	0.774435	0.847956	cytosol	transport; intracellular transport; establishment of localization in cell; single-organism localization; vesicle-mediated transport; single-organism process; Golgi vesicle transport; localization; single-organism intracellular transport; single-organism transport; establishment of localization; cellular localization;	cell part; intracellular; TRAPP complex; macromolecular complex; intracellular part; protein complex; cell;		K20302			IPR024096;	NO signalling/Golgi transport ligand-binding domain;
CL10191Contig1_orf1	glycine--tRNA ligase	85.531	0.916112	0.973093	1.27008	1.06022	1.1335	0.91819	0.804085	0.996122	0.917259	1.05222	0.783667	1.02311	mitochondria	glycyl-tRNA aminoacylation; cellular aromatic compound metabolic process; cellular protein metabolic process; single-organism process; biosynthetic process; tRNA aminoacylation; cellular metabolic process; organic substance metabolic process; metabolic process; cellular amino acid metabolic process; heterocycle metabolic process; nucleobase-containing compound metabolic process; cellular nitrogen…	intracellular part; cell; cell part; intracellular; cytoplasm;	ligase activity, forming aminoacyl-tRNA and related compounds; ATP binding; nucleoside phosphate binding; ligase activity, forming carbon-oxygen bonds; nucleoside binding; ion binding; ligase activity; nucleotide binding; organic cyclic compound binding; heterocyclic compound binding; glycine-tRNA ligase activity; ribonucleoside binding; carbohydrate derivative binding; ribonucleotide binding; ca…	K01880	GARS; glycyl-tRNA synthetase [EC:6.1.1.14]	ko00970 Aminoacyl-tRNA biosynthesis;	IPR033731; IPR002314; IPR009068; IPR004154; IPR000738; IPR006195;	Glycyl-tRNA synthetase-like core domain; Aminoacyl-tRNA synthetase, class II (G/ P/ S/T); S15/NS1, RNA-binding; Anticodon-binding; WHEP-TRS domain; Aminoacyl-tRNA synthetase, class II;
CL10200Contig1_orf1	innexin inx2	42.381	0.936553	0.97725	1.32496	1.2472	1.07466	1.09352	0.814514	0.828608	0.757123	0.751301	0.837754	0.815059	cytosol		gap junction; cell-cell junction; cell junction;
CL10220Contig1_orf1	ribosomal protein P1	11.825	0.72188	0.710655	1.1026	1.18612	1.27509	1.21946	0.805199	0.837238	0.950236	0.869447	0.992416	0.939962	extracellular	translational elongation; cellular protein metabolic process; biosynthetic process; primary metabolic process; cellular metabolic process; organic substance biosynthetic process; cellular biosynthetic process; organic substance metabolic process; metabolic process; cellular macromolecule biosynthetic process; cellular macromolecule metabolic process; gene expression; macromolecule metabolic proce…	ribosome; organelle; intracellular organelle; intracellular non-membrane-bounded organelle; cell part; intracellular; cytoplasm; macromolecular complex; intracellular part; cell; ribonucleoprotein complex; cytoplasmic part; non-membrane-bounded organelle;	structural constituent of ribosome; structural molecule activity;	K02942	RP-LP1; large subunit ribosomal protein LP1	ko03010 Ribosome;
CL10223Contig1_orf1	ribophorin I	69.014	0.959682	0.885555	1.34651	1.36765	1.47891	1.38192	0.579704	0.632207	0.665281	0.635992	0.63524	0.650169	plasma membrane	protein glycosylation; macromolecule glycosylation; glycoprotein biosynthetic process; single-organism cellular process; cellular protein metabolic process; glycoprotein metabolic process; single-organism process; biosynthetic process; primary metabolic process; carbohydrate metabolic process; cellular metabolic process; organic substance biosynthetic process; cellular biosynthetic process; organ…	membrane; intracellular organelle; endoplasmic reticulum; cytoplasm; intrinsic component of membrane; endomembrane system; intracellular part; cell; integral component of membrane; intracellular membrane-bounded organelle; organelle; intracellular; cell part; membrane part; membrane-bounded organelle; cytoplasmic part;	dolichyl-diphosphooligosaccharide-protein glycotransferase activity; transferase activity, transferring glycosyl groups; transferase activity, transferring hexosyl groups; catalytic activity; transferase activity; oligosaccharyl transferase activity;	K12666	OST1; oligosaccharyltransferase complex subunit alpha (ribophorin I)	ko04141 Protein processing in endoplasmic reticulum; ko00513 Various types of N-glycan biosynthesis; ko01100 Metabolic pathways; ko00510 N-Glycan biosynthesis;
CL10229Contig1_orf1	hypothetical protein DAPPUDRAFT_301077	49.931	1.09131		1.17693		0.791222		1.06384		0.754188		1.11804		mitochondria	metabolic process;		catalytic activity; oxidoreductase activity, acting on the aldehyde or oxo group of donors, disulfide as acceptor; oxidoreductase activity; oxidoreductase activity, acting on the aldehyde or oxo group of donors;	K00166	BCKDHA; 2-oxoisovalerate dehydrogenase E1 component alpha subunit [EC:1.2.4.4]	ko00280 Valine, leucine and isoleucine degradation; ko01130 Biosynthesis of antibiotics; ko01110 Biosynthesis of secondary metabolites; ko01100 Metabolic pathways; ko00640 Propanoate metabolism;	IPR001017; IPR029061;	Dehydrogenase, E1 component; Thiamin diphosphate-binding fold;
CL10238Contig1_orf1	serine/threonine-protein phosphatase 6 regulatory subunit 3 isoform X2	66.147													cytosol			binding;	K15501			IPR016024;	Armadillo-type fold;
CL10249Contig1_orf1	40S ribosomal protein S17-like	15.359	0.960555	0.995543	1.27373	1.22774	1.46136	1.36561	0.516933	0.534322	0.738401	0.69946	0.673902	0.73791	cytosol	cellular protein metabolic process; biosynthetic process; primary metabolic process; cellular metabolic process; organic substance biosynthetic process; cellular biosynthetic process; organic substance metabolic process; metabolic process; cellular macromolecule biosynthetic process; cellular macromolecule metabolic process; gene expression; macromolecule metabolic process; protein metabolic proc…	ribosome; organelle; intracellular organelle; intracellular non-membrane-bounded organelle; cell part; intracellular; cytoplasm; macromolecular complex; intracellular part; cell; ribonucleoprotein complex; cytoplasmic part; non-membrane-bounded organelle;	structural constituent of ribosome; structural molecule activity;	K02962	RP-S17e; small subunit ribosomal protein S17e	ko03010 Ribosome;
CL10250Contig1_orf1	ribosomal protein rpl6	37.884	1.04387	1.17376	1.1016	0.917994	0.975703	0.937874	1.02222	0.978775	0.689557	0.906289	1.11365	1.11403	nuclear	cellular protein metabolic process; biosynthetic process; primary metabolic process; cellular metabolic process; organic substance biosynthetic process; cellular biosynthetic process; organic substance metabolic process; metabolic process; cellular macromolecule biosynthetic process; cellular macromolecule metabolic process; gene expression; macromolecule metabolic process; protein metabolic proc…	ribosome; organelle; intracellular organelle; intracellular non-membrane-bounded organelle; cell part; intracellular; cytoplasm; macromolecular complex; intracellular part; cell; ribonucleoprotein complex; cytoplasmic part; non-membrane-bounded organelle;	structural constituent of ribosome; structural molecule activity;	K02934	RP-L6e; large subunit ribosomal protein L6e	ko03010 Ribosome;	IPR008991; IPR014722;	Translation protein SH3-like domain; Ribosomal protein L2 domain 2;
CL10252Contig1_orf1	ubiquinol-cytochrome c reductase, Rieske iron-sulfur polypeptide 1	25.943	0.780211	0.833442	1.33957	1.26195	1.3069	1.15615	0.737245	0.885221	0.753	0.65324	0.776558	0.931639	nuclear	single-organism process; metabolic process; oxidation-reduction process; single-organism metabolic process;	membrane;	2 iron, 2 sulfur cluster binding; ubiquinol-cytochrome-c reductase activity; ion transmembrane transporter activity; oxidoreductase activity, acting on diphenols and related substances as donors; substrate-specific transporter activity; monovalent inorganic cation transmembrane transporter activity; hydrogen ion transmembrane transporter activity; oxidoreductase activity, acting on diphenols and …	K00411	UQCRFS1; ubiquinol-cytochrome c reductase iron-sulfur subunit [EC:1.10.2.2]	ko01100 Metabolic pathways; ko04932 Non-alcoholic fatty liver disease (NAFLD); ko02020 Two-component system; ko04260 Cardiac muscle contraction; ko05010 Alzheimer's disease; ko00190 Oxidative phosphorylation; ko05016 Huntington's disease; ko05012 Parkinson's disease;	IPR006317; IPR017941; IPR015248; IPR005805; IPR004192;	Ubiquinol-cytochrome c reductase, iron-sulphur subunit; Rieske [2Fe-2S] iron-sulphur domain; Ubiquinol-cytochrome c reductase 8kDa, N-terminal; Rieske iron-sulphur protein, C-terminal; Ubiquinol cytochrome reductase, transmembrane domain;
CL10255Contig1_orf1	amylase	79.698	0.71191		1.34985		1.17787		0.748167		0.862311		0.903566		extracellular	metabolic process; carbohydrate metabolic process; primary metabolic process; organic substance metabolic process;		cation binding; catalytic activity; binding; ion binding;				IPR013780; IPR031319; IPR017853; IPR006047; IPR013781;	Glycosyl hydrolase, all-beta; Alpha-amylase, C-terminal domain; Glycoside hydrolase superfamily; Glycosyl hydrolase, family 13, catalytic domain; Glycoside hydrolase, catalytic domain;
CL10259Contig1_orf1	NADH dehydrogenase	11.234	0.935535	0.90085	1.66305	1.71025	1.1077	1.02056	0.563525	0.562427	0.475048	0.498353	0.845597	0.849871	cytosol, nuclear				K03946	NDUFA2; NADH dehydrogenase (ubiquinone) 1 alpha subcomplex subunit 2	ko05010 Alzheimer's disease; ko00190 Oxidative phosphorylation; ko01100 Metabolic pathways; ko05016 Huntington's disease; ko04932 Non-alcoholic fatty liver disease (NAFLD); ko05012 Parkinson's disease;	IPR007741; IPR012336;	Ribosomal protein/NADH dehydrogenase domain; Thioredoxin-like fold;
CL10262Contig1_orf1	serine--pyruvate aminotransferase-like	48.85		1.02467		0.88837		0.985206		1.00986		1.09587		1.06614	nuclear			catalytic activity;	K00830	AGXT; alanine-glyoxylate transaminase / serine-glyoxylate transaminase / serine-pyruvate transaminase [EC:2.6.1.44 2.6.1.45 2.6.1.51]	ko01130 Biosynthesis of antibiotics; ko01110 Biosynthesis of secondary metabolites; ko00260 Glycine, serine and threonine metabolism; ko01100 Metabolic pathways; ko00680 Methane metabolism; ko01120 Microbial metabolism in diverse environments; ko04146 Peroxisome; ko00250 Alanine, aspartate and glutamate metabolism; ko01200 Carbon metabolism; ko00630 Glyoxylate and dicarboxylate metabolism;	IPR015424; IPR000192; IPR015422; IPR015421;	Pyridoxal phosphate-dependent transferase; Aminotransferase class V domain; Pyridoxal phosphate-dependent transferase, major region, subdomain 2; Pyridoxal phosphate-dependent transferase, major region, subdomain 1;
CL10286Contig1_orf1	JHE-like carboxylesterase 1	66.707													extracellular							IPR029058; IPR002018;	Alpha/Beta hydrolase fold; Carboxylesterase, type B;
CL10298Contig1_orf1	predicted protein	85.684	0.856247	0.800989	1.1627	1.25306	1.08657	1.10464	0.787096	0.70979	1.19613	1.00227	0.821583	0.849296	mitochondria	proteolysis; metabolic process; macromolecule metabolic process; protein metabolic process; primary metabolic process; organic substance metabolic process;		endopeptidase activity; metalloendopeptidase activity; peptidase activity; catalytic activity; peptidase activity, acting on L-amino acid peptides; hydrolase activity; metallopeptidase activity;	K01392	THOP1; thimet oligopeptidase [EC:3.4.24.15]	ko05143 African trypanosomiasis; ko04614 Renin-angiotensin system;	IPR024077; IPR001567; IPR024080; IPR024079;	Neurolysin/Thimet oligopeptidase, domain 2; Peptidase M3A/M3B catalytic domain; Neurolysin/Thimet oligopeptidase, N-terminal; Metallopeptidase, catalytic domain;
CL10299Contig1_orf1	hypothetical protein DAPPUDRAFT_58801	75.396	1.4302	1.46406	0.564358	0.572547	0.708097	0.71823	1.48849	1.59823	1.10628	1.10565	0.958575	0.949247	extracellular	metabolic process; carbohydrate metabolic process; primary metabolic process; organic substance metabolic process;		hydrolase activity, hydrolyzing O-glycosyl compounds; beta-galactosidase activity; hydrolase activity; galactosidase activity; catalytic activity; hydrolase activity, acting on glycosyl bonds;				IPR031330; IPR017853; IPR008979; IPR013781;	Glycoside hydrolase 35, catalytic domain; Glycoside hydrolase superfamily; Galactose-binding domain-like; Glycoside hydrolase, catalytic domain;
CL10305Contig1_orf1	proteasome subunit beta type-1	30.879	0.508073	0.616196	0.360476	0.499373	0.315744	0.425863	1.153	1.12705	3.36092	3.01648	1.05053	1.04659	nuclear	proteolysis involved in cellular protein catabolic process; cellular macromolecule catabolic process; cellular protein catabolic process; cellular protein metabolic process; primary metabolic process; cellular metabolic process; organic substance metabolic process; organic substance catabolic process; metabolic process; protein catabolic process; macromolecule catabolic process; cellular macromol…	proteasome complex; cell part; intracellular; proteasome core complex; macromolecular complex; intracellular part; protein complex; cell;	endopeptidase activity; threonine-type endopeptidase activity; peptidase activity; threonine-type peptidase activity; catalytic activity; peptidase activity, acting on L-amino acid peptides; hydrolase activity;	K02732	PSMB1; 20S proteasome subunit beta 6 [EC:3.4.25.1]	ko03050 Proteasome;	IPR029055;	Nucleophile aminohydrolases, N-terminal;
CL10306Contig1_orf1	NADH:ubiquinone oxidoreductase, NDUFC2/B14.5B subunit, putative	14.166	1.10557	0.954317	0.932638	1.03128	0.97597	1.09434	1.04643	1.03302	0.932276	0.946059	1.0417	0.873851	nuclear	phosphorylation; nucleoside metabolic process; purine nucleoside metabolic process; cellular aromatic compound metabolic process; purine ribonucleoside monophosphate metabolic process; ATP synthesis coupled electron transport; ribonucleotide metabolic process; nucleotide metabolic process; single-organism process; respiratory electron transport chain; cellular metabolic process; phosphate-contain…	membrane; intracellular organelle; mitochondrial part; organelle membrane; organelle envelope; intracellular organelle part; cytoplasm; intracellular part; cell; organelle part; mitochondrion; mitochondrial envelope; intracellular membrane-bounded organelle; organelle; cell part; intracellular; envelope; organelle inner membrane; membrane-bounded organelle; mitochondrial inner membrane; mitochond…	NADH dehydrogenase (quinone) activity; oxidoreductase activity, acting on NAD(P)H; NADH dehydrogenase activity; catalytic activity; oxidoreductase activity, acting on NAD(P)H, quinone or similar compound as acceptor; NADH dehydrogenase (ubiquinone) activity; oxidoreductase activity;	K03968	NDUFC2; NADH dehydrogenase (ubiquinone) 1 subunit C2	ko05010 Alzheimer's disease; ko00190 Oxidative phosphorylation; ko01100 Metabolic pathways; ko05016 Huntington's disease; ko04932 Non-alcoholic fatty liver disease (NAFLD); ko05012 Parkinson's disease;
CL1030Contig1_orf1	collagen alpha chain, type IV, putative	147.23	0.855411	0.857568	1.1654	1.1554	1.03172	1.04808	1.07871	1.02042	0.900886	0.833212	0.927393	0.924394	nuclear		macromolecular complex; protein complex; collagen trimer;	extracellular matrix structural constituent; structural molecule activity;	K06237	COL4A; collagen, type IV, alpha	ko04512 ECM-receptor interaction; ko04510 Focal adhesion; ko05200 Pathways in cancer; ko05222 Small cell lung cancer; ko04933 AGE-RAGE signaling pathway in diabetic complications; ko04974 Protein digestion and absorption; ko05146 Amoebiasis; ko04151 PI3K-Akt signaling pathway;	IPR016187;	C-type lectin fold;
CL10311Contig1_orf1	intracellular fatty acid binding protein	17.632	0.823602	0.784351	1.68401	1.54815	0.747483	0.936992	0.516834	0.676526	0.668694	0.779555	1.10907	1.0678	mitochondria	transport; localization; establishment of localization;		lipid binding; binding; transporter activity;	K08756	FABP7; fatty acid-binding protein 7, brain	ko03320 PPAR signaling pathway;	IPR000463; IPR000566; IPR012674; IPR011038;	Cytosolic fatty-acid binding; Lipocalin/cytosolic fatty-acid binding domain; Calycin; Calycin-like;
CL10313Contig1_orf1	beta-N-acetylglucosaminidase	72.456	0.916838	0.943301	0.90772	0.867767	1.70846	1.72311	0.74181	0.729209	0.63007	0.665366	0.71222	0.711904	plasma membrane	metabolic process; carbohydrate metabolic process; primary metabolic process; organic substance metabolic process;		beta-N-acetylhexosaminidase activity; hydrolase activity, hydrolyzing O-glycosyl compounds; hydrolase activity; catalytic activity; hexosaminidase activity; hydrolase activity, acting on glycosyl bonds;	K12373	HEXA_B; hexosaminidase [EC:3.2.1.52]	ko00604 Glycosphingolipid biosynthesis - ganglio series; ko00603 Glycosphingolipid biosynthesis - globo and isoglobo series; ko00531 Glycosaminoglycan degradation; ko00511 Other glycan degradation; ko00513 Various types of N-glycan biosynthesis; ko01100 Metabolic pathways; ko04142 Lysosome; ko00520 Amino sugar and nucleotide sugar metabolism;	IPR029018; IPR029019; IPR015883; IPR017853; IPR013781;	Chitobiase/beta-hexosaminidase domain 2-like; Beta-hexosaminidase, eukaryotic type, N-terminal; Glycoside hydrolase family 20, catalytic domain; Glycoside hydrolase superfamily; Glycoside hydrolase, catalytic domain;
CL10333Contig1_orf1	glutathione S-transferase	30.636	1.13894	1.13196	1.71682	1.7742	1.07268	0.960538	0.568572	0.57731	0.672611	0.623277	0.483547	0.438897	cytosol			protein binding; binding;	K00799	GST; glutathione S-transferase [EC:2.5.1.18]	ko00980 Metabolism of xenobiotics by cytochrome P450; ko00982 Drug metabolism - cytochrome P450; ko00480 Glutathione metabolism; ko05204 Chemical carcinogenesis; ko01524 Platinum drug resistance;	IPR010987; IPR004045; IPR012336;	Glutathione S-transferase, C-terminal-like; Glutathione S-transferase, N-terminal; Thioredoxin-like fold;
CL10343Contig1_orf1	hypothetical protein BRAFLDRAFT_119025	70.218	0.773675	0.736624	1.11455	1.05418	1.35037	1.23821	0.62614	0.753154	1.00054	1.01789	0.943099	0.942341	endoplasmic reticulum	single-organism process; metabolic process; oxidation-reduction process; single-organism metabolic process;		catalytic activity; oxidoreductase activity;				IPR023753;	FAD/NAD(P)-binding domain;
CL10345Contig1_orf1	coatomer subunit delta	62.035	0.90969	1.05813	1.28449	1.00194	1.24167	1.26443	0.773854	0.834388	0.665842	0.78541	0.861322	0.861107	mitochondria	transport; localization; establishment of localization;			K20471			IPR028565; IPR011012; IPR022775;	Mu homology domain; Longin-like domain; AP complex, mu/sigma subunit;
CL10346Contig1_orf1	leucine-rich repeat-containing protein 59	55.363	0.775527	0.834349	1.18272	1.02628	1.78652	1.54626	0.587878	0.58126	0.723983	0.745063	0.490368	0.697018	mitochondria			protein binding; binding;				IPR032675;	Leucine-rich repeat domain, L domain-like;
CL10347Contig1_orf1	hypothetical protein L798_03032	13.778	0.962394		1.0209		0.973543		1.0491		1.00613		0.997235		mitochondria				K03938	NDUFS5; NADH dehydrogenase (ubiquinone) Fe-S protein 5	ko05010 Alzheimer's disease; ko00190 Oxidative phosphorylation; ko01100 Metabolic pathways; ko05016 Huntington's disease; ko04932 Non-alcoholic fatty liver disease (NAFLD); ko05012 Parkinson's disease;
CL10350Contig1_orf1	hypothetical protein DAPPUDRAFT_303125	85.94	1.41014	1.33874	0.567996	0.627798	0.587088	0.614271	1.62339	1.58572	1.12009	1.1379	0.962232	0.986561	plasma membrane				K01301			IPR003137; IPR007484; IPR007365;	PA domain; Peptidase M28; Transferrin receptor-like, dimerisation domain;
CL10359Contig1_orf1	endoplasmic reticulum protein 57	60.026	0.791668	0.768753	1.4513	1.41255	1.55214	1.46933	0.535092	0.478226	0.600279	0.6304	0.633838	0.687522	cytosol	regulation of cellular process; homeostatic process; regulation of biological quality; regulation of biological process; cell redox homeostasis; single-organism cellular process; cellular homeostasis; single-organism process; cellular process; biological regulation;	organelle; intracellular membrane-bounded organelle; intracellular organelle; endoplasmic reticulum; cell part; intracellular; cytoplasm; endomembrane system; intracellular part; membrane-bounded organelle; cell; cytoplasmic part;	isomerase activity; catalytic activity;	K08056	PDIA3; protein disulfide isomerase family A, member 3 [EC:5.3.4.1]	ko04612 Antigen processing and presentation; ko04141 Protein processing in endoplasmic reticulum;	IPR005788; IPR012336; IPR013766;	Disulphide isomerase; Thioredoxin-like fold; Thioredoxin domain;
CL10364Contig1_orf1	hypothetical protein CAPTEDRAFT_162084	21.826	0.936256		1.01306		0.858056		0.563956		1.89552		0.797993		cytosol	cellular protein metabolic process; biosynthetic process; primary metabolic process; cellular metabolic process; organic substance biosynthetic process; cellular biosynthetic process; organic substance metabolic process; metabolic process; cellular macromolecule biosynthetic process; cellular macromolecule metabolic process; gene expression; macromolecule metabolic process; protein metabolic proc…	ribosome; intracellular organelle; intracellular non-membrane-bounded organelle; small ribosomal subunit; intracellular organelle part; cytoplasm; macromolecular complex; intracellular part; cell; organelle part; non-membrane-bounded organelle; organelle; ribosomal subunit; intracellular; cell part; ribonucleoprotein complex; cytoplasmic part;	organic cyclic compound binding; heterocyclic compound binding; RNA binding; binding; nucleic acid binding; structural molecule activity; structural constituent of ribosome;	K02958	RP-S15e; small subunit ribosomal protein S15e	ko03010 Ribosome;	IPR023575;	Ribosomal protein S19, superfamily;
CL10364Contig1_orf2	hypothetical protein CAPTEDRAFT_162084	23.28	1.01655	1.02925	0.863725	0.907588	0.613789	0.65532	1.33254	1.3528	1.25558	1.22027	1.1945	1.19592	mitochondria				K05687	PARK7; protein DJ-1	ko05012 Parkinson's disease;	IPR002818; IPR029062;	DJ-1/PfpI; Class I glutamine amidotransferase-like;
CL10368Contig1_orf1	retinoid-inducible serine carboxypeptidase-like	60.438	1.08178	1.122	0.64975	0.619059	0.682811	0.676705	1.35308	1.43273	1.31115	1.38158	1.18813	1.16673	endoplasmic reticulum	proteolysis; metabolic process; macromolecule metabolic process; protein metabolic process; primary metabolic process; organic substance metabolic process;		carboxypeptidase activity; peptidase activity; exopeptidase activity; catalytic activity; serine hydrolase activity; serine-type peptidase activity; peptidase activity, acting on L-amino acid peptides; hydrolase activity; serine-type carboxypeptidase activity; serine-type exopeptidase activity;	K09646			IPR029058;	Alpha/Beta hydrolase fold;
CL10374Contig1_orf1	hypothetical protein DAPPUDRAFT_305996	82.18	0.896279	0.918046	1.07695	0.973145	1.24053	1.21381	0.657737	0.704314	1.07326	0.982491	0.677659	0.826096	nuclear	proteolysis; metabolic process; macromolecule metabolic process; protein metabolic process; primary metabolic process; organic substance metabolic process;	intracellular part; cell; cell part; intracellular; cytoplasm;	peptidase activity; exopeptidase activity; catalytic activity; dipeptidyl-peptidase activity; peptidase activity, acting on L-amino acid peptides; hydrolase activity; aminopeptidase activity;	K01277
CL10378Contig1_orf1	6-phosphogluconate dehydrogenase, decarboxylating isoform X1	57.562	0.985646	0.921317	0.975763	1.02169	1.41067	1.58004	0.730102	0.536105	0.838815	0.835468	0.669864	0.504502	mitochondria	NADP metabolic process; pyridine nucleotide metabolic process; cellular aromatic compound metabolic process; nicotinamide nucleotide metabolic process; organophosphate catabolic process; nucleotide metabolic process; single-organism process; cellular metabolic process; pyridine-containing compound metabolic process; phosphate-containing compound metabolic process; organic substance metabolic proc…		oxidoreductase activity, acting on CH-OH group of donors; oxidoreductase activity, acting on the CH-OH group of donors, NAD or NADP as acceptor; phosphogluconate dehydrogenase (decarboxylating) activity; catalytic activity; oxidoreductase activity;	K00033	PGD; 6-phosphogluconate dehydrogenase [EC:1.1.1.44 1.1.1.343]	ko00030 Pentose phosphate pathway; ko01120 Microbial metabolism in diverse environments; ko01130 Biosynthesis of antibiotics; ko01200 Carbon metabolism; ko01110 Biosynthesis of secondary metabolites; ko00480 Glutathione metabolism; ko01100 Metabolic pathways;	IPR006115; IPR013328; IPR008927; IPR006114; IPR016040; IPR012284;	6-phosphogluconate dehydrogenase, NADP-binding; 6-phosphogluconate dehydrogenase, domain 2; 6-phosphogluconate dehydrogenase C-terminal domain-like; 6-phosphogluconate dehydrogenase, C-terminal; NAD(P)-binding domain; 6-phosphogluconate dehydrogenase, domain 3;
CL10380Contig1_orf1	S-formylglutathione hydrolase-like	35.19	1.00633	0.989543	1.229	1.20275	1.21224	1.21342	0.821781	0.668986	0.826488	0.752271	0.766508	0.738329	cytosol	single-organism catabolic process; small molecule metabolic process; single-organism cellular process; cellular aldehyde metabolic process; single-organism process; small molecule catabolic process; cellular metabolic process; organic substance metabolic process; organic substance catabolic process; metabolic process; aldehyde catabolic process; single-organism metabolic process; cellular catabol…		hydrolase activity; thiolester hydrolase activity; catalytic activity; S-formylglutathione hydrolase activity; hydrolase activity, acting on ester bonds;	K01070	frmB; S-formylglutathione hydrolase [EC:3.1.2.12]	ko01120 Microbial metabolism in diverse environments; ko01200 Carbon metabolism; ko00680 Methane metabolism;	IPR029058;	Alpha/Beta hydrolase fold;
CL10383Contig1_orf1	Signal recognition particle 9 kDa protein	10.176		0.95962		1.30292		0.964669		0.739179		0.879342		0.977605	extracellular	establishment of protein localization to organelle; posttranscriptional regulation of gene expression; single-organism process; protein transport; establishment of localization; protein targeting; protein targeting to membrane; establishment of localization in cell; protein localization to endoplasmic reticulum; negative regulation of macromolecule biosynthetic process; protein localization to or…	cell part; intracellular; signal recognition particle; cytoplasm; macromolecular complex; intracellular part; ribonucleoprotein complex; cell; cytoplasmic part;	organic cyclic compound binding; heterocyclic compound binding; RNA binding; binding; 7S RNA binding; nucleic acid binding;	K03109	SRP9; signal recognition particle subunit SRP9	ko03060 Protein export;	IPR009018;	Signal recognition particle, SRP9/SRP14 subunit;
CL10397Contig1_orf1	hypothetical protein DAPPUDRAFT_223058	47.436	0.956525	0.999294	0.796627	0.825066	1.07778	1.00845	1.13188	1.16123	0.824265	0.836095	1.23943	1.22664	endoplasmic reticulum				K03662	ATPeVS1; V-type H+-transporting ATPase S1 subunit	ko04145 Phagosome; ko01100 Metabolic pathways; ko05161 Hepatitis B; ko05323 Rheumatoid arthritis; ko05120 Epithelial cell signaling in Helicobacter pylori infection; ko00190 Oxidative phosphorylation; ko04142 Lysosome; ko05152 Tuberculosis; ko05110 Vibrio cholerae infection;
CL10400Contig1_orf1	lectin B isoform 3	26.567	1.07124	1.06301	1.10667	1.09805	0.679879	0.788613	0.966448	1.19294	0.968517	0.906529	1.01586	1.06421	plasma membrane							IPR001304; IPR016187; IPR016186;	C-type lectin-like; C-type lectin fold; C-type lectin-like/link domain;
CL10405Contig2_orf1	delta-9 acyl-CoA desaturase	41.423	0.628088	0.722894	1.64624	1.44343	0.76497	0.82154	0.506476	0.732374	1.40408	1.33995	0.639892	0.781379	plasma membrane	metabolic process; oxidation-reduction process; single-organism metabolic process; single-organism process; primary metabolic process; organic substance metabolic process; lipid metabolic process;		oxidoreductase activity, acting on paired donors, with incorporation or reduction of molecular oxygen; catalytic activity; oxidoreductase activity, acting on paired donors, with oxidation of a pair of donors resulting in the reduction of molecular oxygen to two molecules of water; oxidoreductase activity;	K00507	SCD; stearoyl-CoA desaturase (Delta-9 desaturase) [EC:1.14.19.1]	ko04212 Longevity regulating pathway - worm; ko01212 Fatty acid metabolism; ko03320 PPAR signaling pathway; ko04152 AMPK signaling pathway; ko01040 Biosynthesis of unsaturated fatty acids;	IPR005804;	Fatty acid desaturase domain;
CL1042Contig3_orf1	polypyrimidine tract-binding protein 2 isoform X6	58.686	0.942765	0.954496	1.11767	1.69181	1.11198	1.48167	0.856498	0.299721	0.878647	0.502821	0.832226	0.279961	nuclear	RNA processing; cellular aromatic compound metabolic process; organic cyclic compound metabolic process; nitrogen compound metabolic process; primary metabolic process; cellular metabolic process; organic substance metabolic process; mRNA processing; RNA metabolic process; metabolic process; nucleic acid metabolic process; heterocycle metabolic process; nucleobase-containing compound metabolic pr…	organelle; intracellular membrane-bounded organelle; intracellular organelle; nucleus; cell part; intracellular; intracellular part; membrane-bounded organelle; cell;	organic cyclic compound binding; heterocyclic compound binding; RNA binding; nucleoside phosphate binding; binding; nucleic acid binding; nucleotide binding; small molecule binding;	K13218			IPR000504; IPR012677;	RNA recognition motif domain; Nucleotide-binding alpha-beta plait domain;
CL10430Contig1_orf1	heat shock protein cognate 5	74.736	0.585847	0.632779	1.55145	1.44032	1.47784	1.45536	0.392964	0.417999	0.428716	0.440006	1.02247	1.00819	mitochondria	protein folding; metabolic process; cellular protein metabolic process; cellular macromolecule metabolic process; macromolecule metabolic process; protein metabolic process; primary metabolic process; cellular process; cellular metabolic process; organic substance metabolic process;		ATP binding; nucleoside phosphate binding; nucleoside binding; ion binding; protein binding; nucleotide binding; organic cyclic compound binding; heterocyclic compound binding; ribonucleoside binding; carbohydrate derivative binding; ribonucleotide binding; binding; purine ribonucleoside binding; anion binding; purine ribonucleotide binding; unfolded protein binding; adenyl ribonucleotide binding…	K04043	dnaK; molecular chaperone DnaK	ko04212 Longevity regulating pathway - worm; ko03018 RNA degradation; ko05152 Tuberculosis;	IPR029048; IPR029047;	Heat shock protein 70kD, C-terminal domain; Heat shock protein 70kD, peptide-binding domain;
CL10435Contig1_orf1	pancreatic lipase-related protein	45.093	1.25162	1.28557	0.846714	0.871373	0.674727	0.68592	1.40484	1.45546	0.927325	0.884972	1.12106	1.20573	plasma membrane	single-organism process; metabolic process; primary metabolic process; single-organism metabolic process; lipid metabolic process; organic substance metabolic process;		hydrolase activity; carboxylic ester hydrolase activity; catalytic activity; hydrolase activity, acting on ester bonds;				IPR029058; IPR013818; IPR033906;	Alpha/Beta hydrolase fold; Lipase/vitellogenin; Lipase, N-terminal;
CL10443Contig1_orf1	hypothetical protein DAPPUDRAFT_240263	77.414	1.55007	1.62126	0.694313	0.753852	0.798606	0.779883	1.20667	1.20063	0.852095	0.891652	1.04939	1.01571	peroxisome							IPR029058; IPR002018;	Alpha/Beta hydrolase fold; Carboxylesterase, type B;
CL10445Contig1_orf1	NFX1-type zinc finger-containing protein 1	238.35	0.924045	0.803589	1.20397	1.26391	1.46423	1.49269	0.630384	0.629944	0.609875	0.616348	0.642526	0.614835	nuclear	regulation of cellular process; regulation of gene expression; regulation of transcription, DNA-templated; regulation of cellular biosynthetic process; regulation of primary metabolic process; regulation of macromolecule metabolic process; regulation of nucleobase-containing compound metabolic process; regulation of macromolecule biosynthetic process; regulation of cellular metabolic process; reg…	organelle; intracellular membrane-bounded organelle; intracellular organelle; nucleus; cell part; intracellular; intracellular part; membrane-bounded organelle; cell;	transition metal ion binding; binding; nucleic acid binding transcription factor activity; ion binding; metal ion binding; cation binding; zinc ion binding; sequence-specific DNA binding transcription factor activity;				IPR000967; IPR027417;	Zinc finger, NF-X1-type; P-loop containing nucleoside triphosphate hydrolase;
CL10447Contig1_orf1	NADH-cytochrome b5 reductase	91.267	0.954184	0.92555	1.48602	1.67126	0.865801	0.884423	0.677502	0.752657	0.750277	0.775671	0.742197	0.748969	mitochondria	single-organism process; metabolic process; oxidation-reduction process; single-organism metabolic process;		organic cyclic compound binding; heterocyclic compound binding; oxidoreductase activity, acting on the CH-CH group of donors; nucleoside phosphate binding; flavin adenine dinucleotide binding; catalytic activity; binding; ion binding; anion binding; nucleotide binding; cofactor binding; small molecule binding; coenzyme binding; oxidoreductase activity;				IPR001433; IPR017927; IPR008333; IPR009100; IPR013786; IPR017938; IPR009075;	Oxidoreductase FAD/NAD(P)-binding; Ferredoxin reductase-type FAD-binding domain; Oxidoreductase, FAD-binding domain; Acyl-CoA dehydrogenase/oxidase, N-terminal and middle domain; Acyl-CoA dehydrogenase/oxidase, N-terminal; Riboflavin synthase-like beta-barrel; Acyl-CoA dehydrogenase/oxidase C-terminal;
CL10448Contig1_orf1	conserved hypothetical protein	55.242	0.985303	0.981246	1.05145	1.16734	0.924337	0.942698	1.03165	0.922757	0.97324	0.907074	1.02678	0.950211	plasma membrane		intrinsic component of membrane; membrane; integral component of membrane; membrane part;
CL10453Contig1_orf1	Rab14	27.313	0.777824	0.721271	0.992519	0.972473	1.78233	1.74587	0.687349	0.653913	0.672128	0.666353	0.727121	0.7696	cytoskeleton	regulation of cellular process; single organism signaling; cellular response to stimulus; signal transduction; regulation of biological process; cell communication; intracellular signal transduction; single-organism cellular process; single-organism process; small GTPase mediated signal transduction; signaling; response to stimulus; cellular process; biological regulation;		nucleoside phosphate binding; nucleoside binding; ion binding; nucleotide binding; organic cyclic compound binding; heterocyclic compound binding; ribonucleoside binding; carbohydrate derivative binding; ribonucleotide binding; binding; purine ribonucleoside binding; anion binding; purine ribonucleotide binding; purine nucleoside binding; guanyl ribonucleotide binding; guanyl nucleotide binding; …	K07881	RAB14; Ras-related protein Rab-14	ko04152 AMPK signaling pathway;	IPR005225; IPR027417;	Small GTP-binding protein domain; P-loop containing nucleoside triphosphate hydrolase;
CL10466Contig1_orf1	baiser CG11785-PA protein	24.761	0.876062	0.86542	1.54579	1.51028	1.21621	1.32388	0.597588	0.527634	0.63515	0.62727	0.669057	0.602143	plasma membrane	transport; localization; establishment of localization;	intrinsic component of membrane; membrane; integral component of membrane; membrane part;		K20352			IPR009038;	GOLD domain;
CL10476Contig2_orf1	multidrug resistance-associated protein 1 isoform X4	173.27	1.03981	1.02571	1.12996	1.02323	1.14038	1.0282	0.736051	0.860158	0.811713	0.924566	0.942284	1.08869	plasma membrane	transport; transmembrane transport; single-organism localization; single-organism cellular process; single-organism process; localization; cellular process; single-organism transport; establishment of localization;	intrinsic component of membrane; membrane; integral component of membrane; membrane part;	nucleoside phosphate binding; primary active transmembrane transporter activity; hydrolase activity, acting on acid anhydrides; hydrolase activity; ATPase activity; organic cyclic compound binding; heterocyclic compound binding; pyrophosphatase activity; catalytic activity; ribonucleotide binding; ATPase activity, coupled to movement of substances; binding; purine ribonucleoside binding; hydrolas…	K05665	ABCC1; ATP-binding cassette, subfamily C (CFTR/MRP), member 1	ko05206 MicroRNAs in cancer; ko02010 ABC transporters; ko04977 Vitamin digestion and absorption; ko01523 Antifolate resistance; ko04071 Sphingolipid signaling pathway;	IPR003593; IPR003439; IPR027417; IPR011527;	AAA+ ATPase domain; ABC transporter-like; P-loop containing nucleoside triphosphate hydrolase; ABC transporter type 1, transmembrane domain;
CL10482Contig1_orf1	solute carrier organic anion transporter family member 4C1 isoform X1	82.343	1.05691		0.76669		0.816686		1.26772		0.840299		1.44505		plasma membrane	transport; localization; establishment of localization;	membrane;	protein binding; binding; transporter activity;				IPR020846; IPR002350;	Major facilitator superfamily domain; Kazal domain;
CL10491Contig1_orf1	26S proteasome non-ATPase regulatory subunit 8	32.787		0.879888		1.17842		1.40221		0.660346		0.720015		0.77096	cytoskeleton				K03031	PSMD8; 26S proteasome regulatory subunit N12	ko05169 Epstein-Barr virus infection; ko03050 Proteasome;	IPR011991; IPR033464;	Winged helix-turn-helix DNA-binding domain; CSN8/PSMD8/EIF3K;
CL10506Contig1_orf1	ribosomal protein S18	19.477	1.2072	0.943005	1.21344	1.30719	1.1502	1.20645	0.658795	0.733238	0.83047	0.652702	0.727068	0.823043	cytosol	cellular protein metabolic process; biosynthetic process; primary metabolic process; cellular metabolic process; organic substance biosynthetic process; cellular biosynthetic process; organic substance metabolic process; metabolic process; cellular macromolecule biosynthetic process; cellular macromolecule metabolic process; gene expression; macromolecule metabolic process; protein metabolic proc…	ribosome; organelle; intracellular organelle; intracellular non-membrane-bounded organelle; cell part; intracellular; cytoplasm; macromolecular complex; intracellular part; cell; ribonucleoprotein complex; cytoplasmic part; non-membrane-bounded organelle;	organic cyclic compound binding; heterocyclic compound binding; RNA binding; binding; nucleic acid binding; structural molecule activity; structural constituent of ribosome;	K02964	RP-S18e; small subunit ribosomal protein S18e	ko03010 Ribosome;	IPR010979; IPR027437;	Ribosomal protein S13-like, H2TH; 30s ribosomal protein S13, C-terminal;
CL10510Contig1_orf1	fasciclin-2 isoform X4	89.212	0.840843	0.843744	1.39126	1.29601	1.23174	1.19353	0.744952	0.836268	0.751617	0.706623	0.791116	0.932471	plasma membrane	cell adhesion; biological adhesion;	membrane;	protein binding; binding;	K06491	NCAM; neural cell adhesion molecule	ko04514 Cell adhesion molecules (CAMs); ko05020 Prion diseases;	IPR003598; IPR007110; IPR013783; IPR003599; IPR003961; IPR013151; IPR013098;	Immunoglobulin subtype 2; Immunoglobulin-like domain; Immunoglobulin-like fold; Immunoglobulin subtype; Fibronectin type III; Immunoglobulin; Immunoglobulin I-set;
CL10512Contig1_orf1	hypothetical protein DAPPUDRAFT_314000	82.874	1.1225	1.1155	0.651833	0.695722	0.89315	0.953712	1.51571	1.48837	0.902293	0.893376	1.23711	1.18538	plasma membrane			transferase activity, transferring acyl groups; transferase activity, transferring acyl groups other than amino-acyl groups; catalytic activity; transferase activity;				IPR002656; IPR006621;	Acyltransferase 3; Nose resistant-to-fluoxetine protein, N-terminal;
CL10515Contig1_orf1	glucan pattern-recognition lipoprotein	10.161	1.43595	1.18712	0.943915	1.00437	1.26724	1.02685	0.717256	1.07627	0.907886	0.87766	0.583429	0.788127	mitochondria
CL1051Contig1_orf1	chitinase precursor	7.2451	0.702753	0.672413	0.793078	0.838274	0.64424	0.670296	1.35643	1.42514	1.20252	1.20196	1.6521	1.62397	cytosol	metabolic process; carbohydrate metabolic process; primary metabolic process; organic substance metabolic process;		hydrolase activity, hydrolyzing O-glycosyl compounds; hydrolase activity; catalytic activity; hydrolase activity, acting on glycosyl bonds;				IPR001223; IPR017853; IPR013781;	Glycoside hydrolase family 18, catalytic domain; Glycoside hydrolase superfamily; Glycoside hydrolase, catalytic domain;
CL1051Contig2_orf1	chitinase precursor	61.513	1.13082	1.09771	0.814859	0.853287	0.675434	0.661021	1.37937	1.42752	0.890522	0.87999	1.28531	1.3319	extracellular	glucosamine-containing compound metabolic process; chitin metabolic process; aminoglycan catabolic process; carbohydrate derivative catabolic process; nitrogen compound metabolic process; chitin catabolic process; carbohydrate metabolic process; primary metabolic process; glucosamine-containing compound catabolic process; organic substance metabolic process; organic substance catabolic process; m…	extracellular region;	hydrolase activity, hydrolyzing O-glycosyl compounds; chitin binding; carbohydrate derivative binding; hydrolase activity; chitinase activity; catalytic activity; binding; hydrolase activity, acting on glycosyl bonds;	K01183	E3.2.1.14; chitinase [EC:3.2.1.14]	ko01100 Metabolic pathways; ko00520 Amino sugar and nucleotide sugar metabolism;	IPR001223; IPR011583; IPR029070; IPR002557; IPR017853; IPR013781;	Glycoside hydrolase family 18, catalytic domain; Chitinase II; Chitinase insertion domain; Chitin binding domain; Glycoside hydrolase superfamily; Glycoside hydrolase, catalytic domain;
CL1051Contig3_orf1	chitinase precursor	54.768	0.680939	0.662061	0.865878	0.837681	0.682102	0.631927	1.30594	1.45802	1.11419	1.16412	1.46724	1.68287	extracellular	glucosamine-containing compound metabolic process; chitin metabolic process; aminoglycan catabolic process; carbohydrate derivative catabolic process; nitrogen compound metabolic process; chitin catabolic process; carbohydrate metabolic process; primary metabolic process; glucosamine-containing compound catabolic process; organic substance metabolic process; organic substance catabolic process; m…	extracellular region;	hydrolase activity, hydrolyzing O-glycosyl compounds; chitin binding; carbohydrate derivative binding; hydrolase activity; chitinase activity; catalytic activity; binding; hydrolase activity, acting on glycosyl bonds;	K01183	E3.2.1.14; chitinase [EC:3.2.1.14]	ko01100 Metabolic pathways; ko00520 Amino sugar and nucleotide sugar metabolism;	IPR001223; IPR011583; IPR029070; IPR002557; IPR017853; IPR013781;	Glycoside hydrolase family 18, catalytic domain; Chitinase II; Chitinase insertion domain; Chitin binding domain; Glycoside hydrolase superfamily; Glycoside hydrolase, catalytic domain;
CL1051Contig4_orf1	chitinase precursor	61.476													mitochondria	glucosamine-containing compound metabolic process; chitin metabolic process; aminoglycan catabolic process; carbohydrate derivative catabolic process; nitrogen compound metabolic process; chitin catabolic process; carbohydrate metabolic process; primary metabolic process; glucosamine-containing compound catabolic process; organic substance metabolic process; organic substance catabolic process; m…	extracellular region;	hydrolase activity, hydrolyzing O-glycosyl compounds; chitin binding; carbohydrate derivative binding; hydrolase activity; chitinase activity; catalytic activity; binding; hydrolase activity, acting on glycosyl bonds;	K01183	E3.2.1.14; chitinase [EC:3.2.1.14]	ko01100 Metabolic pathways; ko00520 Amino sugar and nucleotide sugar metabolism;	IPR001223; IPR029070; IPR011583; IPR002557; IPR017853; IPR013781;	Glycoside hydrolase family 18, catalytic domain; Chitinase insertion domain; Chitinase II; Chitin binding domain; Glycoside hydrolase superfamily; Glycoside hydrolase, catalytic domain;
CL10525Contig1_orf1	hypothetical protein DAPPUDRAFT_200252	45.825	1.19116	1.20447	0.639456	0.537406	0.925006	0.917727	1.67761	1.70359	0.76864	0.900663	1.03423	1.11165	endoplasmic reticulum			catalytic activity; oxidoreductase activity;				IPR016040;	NAD(P)-binding domain;
CL10530Contig1_orf1	ecdysteroid-regulated protein	17.004	1.1799	1.16032	0.774537	0.766873	0.609871	0.640224	1.56039	1.71163	1.12353	1.16117	0.991819	1.03145	extracellular	sterol transport; intracellular transport; organic hydroxy compound transport; lipid transport; cholesterol transport; single-organism process; lipid localization; organic substance transport; intracellular sterol transport; single-organism intracellular transport; establishment of localization; cellular localization; transport; establishment of localization in cell; intracellular lipid transport…			K13443	NPC2; Niemann-Pick C2 protein	ko04142 Lysosome;	IPR033916; IPR014756; IPR003172;	ML domain, Npc2 like; Immunoglobulin E-set; MD-2-related lipid-recognition domain;
CL10533Contig1_orf1	hypothetical protein DAPPUDRAFT_222217	21.607	1.05737	1.01227	1.00535	1.01868	0.833767	0.84406	1.01041	0.998644	1.00183	1.04782	1.1576	1.134	cytosol
CL10535Contig1_orf1	aldehyde dehydrogenase isoform 2	21.24	0.624315	0.603254	0.678816	0.647796	0.904042	0.915636	1.34629	1.40338	1.20266	1.29966	1.50188	1.55606	cytosol, mitochondria	single-organism process; metabolic process; oxidation-reduction process; single-organism metabolic process;		catalytic activity; oxidoreductase activity;				IPR016161; IPR015590; IPR016162;	Aldehyde/histidinol dehydrogenase; Aldehyde dehydrogenase domain; Aldehyde dehydrogenase N-terminal domain;
CL10537Contig2_orf1	hypothetical protein YQE_10512, partial	10.404	0.95047	0.910818	1.15902	1.17691	0.981312	1.02905	0.936643	0.872381	0.932262	0.997238	0.97315	0.869648	cytosol
CL10538Contig1_orf1	thioredoxin-like protein 1	33.102	0.843062	0.93794	1.0783	1.01737	1.34403	1.29187	0.770285	0.800372	0.828549	0.871815	0.933157	0.939797	cytosol	regulation of cellular process; homeostatic process; regulation of biological quality; regulation of biological process; cell redox homeostasis; single-organism cellular process; cellular homeostasis; single-organism process; cellular process; biological regulation;						IPR013766; IPR012336; IPR010400; IPR008979;	Thioredoxin domain; Thioredoxin-like fold; PITH domain; Galactose-binding domain-like;
CL10547Contig1_orf1	reticulon-1-A isoform X4	35.431	1.06429	1.13266	0.876609	0.864627	0.816064	0.657038	0.953733	1.1257	1.23235	1.29526	1.19279	1.2196	plasma membrane				K20721			IPR003388;	Reticulon;
CL10551Contig1_orf1	60S ribosomal protein L37a	13.173	1.04962	0.962269	1.65681	1.18144	0.929538	0.95649	0.616905	0.769521	0.765842	0.887503	0.749928	0.780339	extracellular	cellular protein metabolic process; biosynthetic process; primary metabolic process; cellular metabolic process; organic substance biosynthetic process; cellular biosynthetic process; organic substance metabolic process; metabolic process; cellular macromolecule biosynthetic process; cellular macromolecule metabolic process; gene expression; macromolecule metabolic process; protein metabolic proc…	ribosome; organelle; intracellular organelle; intracellular non-membrane-bounded organelle; cell part; intracellular; cytoplasm; macromolecular complex; intracellular part; cell; ribonucleoprotein complex; cytoplasmic part; non-membrane-bounded organelle;	structural constituent of ribosome; structural molecule activity;	K02921	RP-L37Ae; large subunit ribosomal protein L37Ae	ko03010 Ribosome;	IPR011332; IPR011331;	Zinc-binding ribosomal protein; Ribosomal protein L37ae/L37e;
CL10563Contig1_orf1	uncharacterized protein LOC102383910	63.623	1.07063	1.12488	0.735452	0.827927	1.57599	1.81675	0.842204	0.649132	0.661976	0.542887	0.940212	0.748599	cytosol			nucleoside phosphate binding; nucleoside binding; ion binding; nucleotide binding; organic cyclic compound binding; heterocyclic compound binding; ribonucleoside binding; carbohydrate derivative binding; ribonucleotide binding; binding; purine ribonucleoside binding; anion binding; purine ribonucleotide binding; purine nucleoside binding; guanyl ribonucleotide binding; guanyl nucleotide binding; …				IPR006073; IPR027417;	GTP binding domain; P-loop containing nucleoside triphosphate hydrolase;
CL10566Contig1_orf1	Threonyl-tRNA synthetase, cytoplasmic, putative	81.215	0.9217	0.913583	1.35202	1.24152	1.12035	1.04336	0.61706	0.729951	0.800605	0.792375	0.79455	0.841556	nuclear	cellular aromatic compound metabolic process; cellular protein metabolic process; single-organism process; biosynthetic process; tRNA aminoacylation; cellular metabolic process; threonyl-tRNA aminoacylation; organic substance metabolic process; metabolic process; cellular amino acid metabolic process; heterocycle metabolic process; nucleobase-containing compound metabolic process; cellular nitrog…	intracellular part; cell; cell part; intracellular; cytoplasm;	ligase activity, forming aminoacyl-tRNA and related compounds; threonine-tRNA ligase activity; ATP binding; nucleoside phosphate binding; ligase activity, forming carbon-oxygen bonds; nucleoside binding; ion binding; ligase activity; nucleotide binding; organic cyclic compound binding; heterocyclic compound binding; ribonucleoside binding; carbohydrate derivative binding; catalytic activity; ribo…	K01868	TARS; threonyl-tRNA synthetase [EC:6.1.1.3]	ko00970 Aminoacyl-tRNA biosynthesis;	IPR033728; IPR012947; IPR018163; IPR012676; IPR002314; IPR004095; IPR004154; IPR012675; IPR006195;	Threonine-tRNA ligase catalytic core domain; Threonyl/alanyl tRNA synthetase, SAD; Threonyl/alanyl tRNA synthetase, class II-like, putative editing domain; TGS-like; Aminoacyl-tRNA synthetase, class II (G/ P/ S/T); TGS; Anticodon-binding; Beta-grasp domain; Aminoacyl-tRNA synthetase, class II;
CL1056Contig4_orf1	Vacuolar protein sorting-associated protein 35	94.921	1.09566	1.12059	1.01991	1.02523	1.24472	1.17231	0.928866	0.822112	0.873307	0.832553	0.745487	0.732925	cytosol	intracellular transport; vesicle-mediated transport; single-organism process; organic substance transport; protein transport; single-organism intracellular transport; establishment of localization; cellular localization; endosomal transport; transport; establishment of protein localization; establishment of localization in cell; single-organism localization; retrograde transport, endosome to Golg…	membrane; retromer complex; membrane part; cell part; endomembrane system; macromolecular complex; protein complex; cell;	substrate-specific transporter activity; protein transporter activity; transporter activity;	K18468	VPS35; vacuolar protein sorting-associated protein 35	ko04144 Endocytosis;
CL10585Contig1_orf1	Beta-crystallin A1	28.585	1.36501	1.3282	0.73315	0.737992	1.00696	0.929545	0.83245	0.850596	1.09105	1.16865	1.0539	0.958668	extracellular							IPR011024; IPR001064;	Gamma-crystallin-related; Beta/gamma crystallin;
CL10588Contig1_orf1	ADP ribosylation factor 4	22.626	1.17228	1.14533	1.15601	1.16623	1.17588	1.17471	0.801675	0.79098	0.621017	0.601864	0.929036	0.840159	cytosol	regulation of cellular process; single organism signaling; cellular response to stimulus; signal transduction; regulation of biological process; cell communication; intracellular signal transduction; single-organism cellular process; single-organism process; small GTPase mediated signal transduction; signaling; response to stimulus; cellular process; biological regulation;	cell; intracellular; cell part;	nucleoside phosphate binding; nucleoside binding; ion binding; nucleotide binding; organic cyclic compound binding; heterocyclic compound binding; ribonucleoside binding; carbohydrate derivative binding; ribonucleotide binding; binding; purine ribonucleoside binding; anion binding; purine ribonucleotide binding; purine nucleoside binding; guanyl ribonucleotide binding; guanyl nucleotide binding; …	K07977			IPR005225; IPR027417;	Small GTP-binding protein domain; P-loop containing nucleoside triphosphate hydrolase;
CL10589Contig1_orf1	hypothetical protein LOTGIDRAFT_229502	214.22	0.799651	0.876046	1.25808	1.05765	0.984749	0.952601	0.64431	0.736622	1.07167	1.196	1.11227	1.20096	plasma membrane			ATP binding; nucleoside phosphate binding; nucleoside binding; ion binding; hydrolase activity, acting on acid anhydrides; hydrolase activity; nucleotide binding; nucleoside-triphosphatase activity; ATPase activity; organic cyclic compound binding; heterocyclic compound binding; ribonucleoside binding; carbohydrate derivative binding; pyrophosphatase activity; catalytic activity; ribonucleotide b…	K05643	ABCA3; ATP-binding cassette, subfamily A (ABC1), member 3	ko02010 ABC transporters;	IPR003593; IPR003439; IPR027417;	AAA+ ATPase domain; ABC transporter-like; P-loop containing nucleoside triphosphate hydrolase;
CL10590Contig1_orf1	anti-lipopolysaccharide factor isoform 2	14.53	0.721706	0.629162	0.922308	0.98188	1.50911	1.6557	0.720881	0.654956	0.600901	0.552882	1.31008	1.13004	extracellular
CL10591Contig1_orf1	Gamma-crystallin A	28.483	1.13917	1.04631	0.77137	0.828726	0.709107	0.808781	1.59723	1.4367	1.18059	1.25192	0.934654	1.00421	extracellular							IPR011024;	Gamma-crystallin-related;
CL10604Contig1_orf1	peritrophin-44-like protein	30.958	0.94433	0.928125	0.616074	0.545208	0.731169	0.658039	0.907281	0.909845	2.40733	2.59438	0.859634	0.805633	extracellular	glucosamine-containing compound metabolic process; metabolic process; chitin metabolic process; carbohydrate derivative metabolic process; nitrogen compound metabolic process; amino sugar metabolic process; macromolecule metabolic process; aminoglycan metabolic process; organonitrogen compound metabolic process; organic substance metabolic process;	extracellular region;	chitin binding; carbohydrate derivative binding; binding;				IPR002557;	Chitin binding domain;
CL10611Contig1_orf1	glucose-6-phosphate isomerase	63.043	0.862773	0.811359	1.0582	1.05849	1.24532	1.29118	0.703634	0.56715	0.986203	0.998926	0.78132	0.779508	cytosol	carbohydrate biosynthetic process; glycolytic process; hexose biosynthetic process; single-organism process; biosynthetic process; monosaccharide biosynthetic process; cellular metabolic process; organic substance metabolic process; glucose metabolic process; pyruvate metabolic process; metabolic process; gluconeogenesis; generation of precursor metabolites and energy; monosaccharide metabolic pr…		glucose-6-phosphate isomerase activity; isomerase activity; intramolecular oxidoreductase activity; catalytic activity; intramolecular oxidoreductase activity, interconverting aldoses and ketoses;	K01810	GPI; glucose-6-phosphate isomerase [EC:5.3.1.9]	ko00030 Pentose phosphate pathway; ko01130 Biosynthesis of antibiotics; ko00500 Starch and sucrose metabolism; ko01110 Biosynthesis of secondary metabolites; ko01100 Metabolic pathways; ko01120 Microbial metabolism in diverse environments; ko01200 Carbon metabolism; ko00010 Glycolysis / Gluconeogenesis; ko00520 Amino sugar and nucleotide sugar metabolism;	IPR023096;	Phosphoglucose isomerase, C-terminal;
CL10613Contig1_orf1	60S acidic ribosomal protein P2-like protein	11.246	0.811864	0.830605	1.17292	1.16154	1.17455	1.14025	0.791393	0.75179	1.00945	0.940449	0.962484	0.999671	cytosol	translational elongation; cellular protein metabolic process; biosynthetic process; primary metabolic process; cellular metabolic process; organic substance biosynthetic process; cellular biosynthetic process; organic substance metabolic process; metabolic process; cellular macromolecule biosynthetic process; cellular macromolecule metabolic process; gene expression; macromolecule metabolic proce…	ribosome; organelle; intracellular organelle; intracellular non-membrane-bounded organelle; cell part; intracellular; cytoplasm; macromolecular complex; intracellular part; cell; ribonucleoprotein complex; cytoplasmic part; non-membrane-bounded organelle;	structural constituent of ribosome; structural molecule activity;	K02943	RP-LP2; large subunit ribosomal protein LP2	ko03010 Ribosome;
CL10614Contig1_orf1	Polyadenylate-binding protein-interacting protein 1	52.711	0.847641	0.846059	1.55728	1.63316	1.20408	1.22028	0.655911	0.56314	0.622911	0.605748	0.732612	0.597172	nuclear			organic cyclic compound binding; heterocyclic compound binding; RNA binding; protein binding; binding; nucleic acid binding;	K14322	PAIP1; polyadenylate-binding protein-interacting protein 1	ko03013 RNA transport;	IPR016024; IPR003890; IPR016021;	Armadillo-type fold; MIF4G-like, type 3; MIF4G-like domain;
CL10619Contig1_orf1	GF10219	30.962	0.876915	0.85734	1.58257	1.54041	1.2833	1.3331	0.545986	0.601595	0.651238	0.617154	0.625241	0.731651	cytosol	single-organism process; metabolic process; oxidation-reduction process; single-organism metabolic process;		oxidoreductase activity, acting on NAD(P)H; NADH dehydrogenase activity; catalytic activity; NADH dehydrogenase (quinone) activity; NADH dehydrogenase (ubiquinone) activity; oxidoreductase activity, acting on NAD(P)H, quinone or similar compound as acceptor; oxidoreductase activity;	K03936	NDUFS3; NADH dehydrogenase (ubiquinone) Fe-S protein 3 [EC:1.6.5.3 1.6.99.3]	ko05010 Alzheimer's disease; ko00190 Oxidative phosphorylation; ko01100 Metabolic pathways; ko05016 Huntington's disease; ko04932 Non-alcoholic fatty liver disease (NAFLD); ko05012 Parkinson's disease;	IPR001268;	NADH:ubiquinone oxidoreductase, 30kDa subunit;
CL10620Contig2_orf1	hypothetical protein BRAFLDRAFT_206907	52.472		1.20231		0.798927		1.08472		1.08746		0.940116		0.924332	extracellular	metabolic process;		hydrolase activity; sulfuric ester hydrolase activity; catalytic activity; hydrolase activity, acting on ester bonds;				IPR017849; IPR017850; IPR000917;	Alkaline phosphatase-like, alpha/beta/alpha; Alkaline-phosphatase-like, core domain; Sulfatase, N-terminal;
CL10626Contig1_orf1	conserved hypothetical protein	54.162													nuclear				K18411			IPR009071; IPR024970;	High mobility group box domain; Maelstrom domain;
CL10627Contig1_orf1	cytochrome b-c1 complex subunit 2, mitochondrial	47.869	0.711294	0.847784	2.10867	1.30727	1.157	1.12822	0.298869	0.670224	0.401854	0.653409	0.67673	0.839544	nuclear			metal ion binding; cation binding; catalytic activity; binding; ion binding;	K00415	QCR2; ubiquinol-cytochrome c reductase core subunit 2	ko04260 Cardiac muscle contraction; ko05010 Alzheimer's disease; ko00190 Oxidative phosphorylation; ko01100 Metabolic pathways; ko05016 Huntington's disease; ko04932 Non-alcoholic fatty liver disease (NAFLD); ko05012 Parkinson's disease;	IPR007863; IPR011765; IPR011249; IPR011237;	Peptidase M16, C-terminal; Peptidase M16, N-terminal; Metalloenzyme, LuxS/M16 peptidase-like; Peptidase M16 domain;
CL10629Contig1_orf1	lectin B isoform 2	21.439	1.12637	1.09582	1.49174	1.23878	0.648527	0.618165	0.924362	1.02	0.815941	0.946865	0.896755	1.09099	mitochondria							IPR001304; IPR016187; IPR016186;	C-type lectin-like; C-type lectin fold; C-type lectin-like/link domain;
CL1062Contig1_orf1	hypothetical protein DAPPUDRAFT_328375	44.719	0.897802	0.840297	0.812625	0.850251	1.20331	1.23329	0.811267	0.781739	1.42905	1.37412	0.807244	0.848836	extracellular							IPR000716;	Thyroglobulin type-1;
CL10632Contig1_orf1	putative aminopeptidase W07G4.4-like	55.853	0.947214	0.987708	1.14079	1.12115	1.30234	1.40738	0.786278	0.62772	0.744728	0.632369	0.840703	0.849011	cytosol	proteolysis; metabolic process; macromolecule metabolic process; protein metabolic process; primary metabolic process; organic substance metabolic process;	intracellular part; cell; intracellular; cell part; cytoplasm;	peptidase activity; exopeptidase activity; transition metal ion binding; catalytic activity; binding; metalloexopeptidase activity; ion binding; cation binding; peptidase activity, acting on L-amino acid peptides; metal ion binding; metallopeptidase activity; hydrolase activity; aminopeptidase activity; manganese ion binding;	K01255	CARP; leucyl aminopeptidase [EC:3.4.11.1]	ko00480 Glutathione metabolism; ko01100 Metabolic pathways;	IPR000819;	Peptidase M17, leucyl aminopeptidase, C-terminal;
CL10636Contig1_orf1	hypothetical protein DAPPUDRAFT_303718	59.314	1.07563	1.0999	1.15207	1.28832	1.06116	1.09815	0.89181	0.703018	0.802236	0.73766	0.814166	0.808676	mitochondria	single-organism process; metabolic process; oxidation-reduction process; single-organism metabolic process;		oxidoreductase activity, acting on the aldehyde or oxo group of donors, NAD or NADP as acceptor; methylmalonate-semialdehyde dehydrogenase (acylating) activity; catalytic activity; oxidoreductase activity; oxidoreductase activity, acting on the aldehyde or oxo group of donors;	K00140	mmsA; malonate-semialdehyde dehydrogenase (acetylating) / methylmalonate-semialdehyde dehydrogenase [EC:1.2.1.18 1.2.1.27]	ko00280 Valine, leucine and isoleucine degradation; ko01200 Carbon metabolism; ko01100 Metabolic pathways; ko00410 beta-Alanine metabolism; ko00562 Inositol phosphate metabolism; ko00640 Propanoate metabolism;	IPR016161; IPR015590; IPR016162; IPR016163;	Aldehyde/histidinol dehydrogenase; Aldehyde dehydrogenase domain; Aldehyde dehydrogenase N-terminal domain; Aldehyde dehydrogenase, C-terminal;
CL10642Contig1_orf1	60S ribosomal protein L18a	23.262	1.02492	1.01395	1.03776	1.08522	1.12012	1.16908	0.889133	0.776744	0.864195	0.863635	0.894696	0.897097	mitochondria	cellular protein metabolic process; biosynthetic process; primary metabolic process; cellular metabolic process; organic substance biosynthetic process; cellular biosynthetic process; organic substance metabolic process; metabolic process; cellular macromolecule biosynthetic process; cellular macromolecule metabolic process; gene expression; macromolecule metabolic process; protein metabolic proc…	ribosome; organelle; intracellular organelle; intracellular non-membrane-bounded organelle; cell part; intracellular; cytoplasm; macromolecular complex; intracellular part; cell; ribonucleoprotein complex; cytoplasmic part; non-membrane-bounded organelle;	structural constituent of ribosome; structural molecule activity;	K02882	RP-L18Ae; large subunit ribosomal protein L18Ae	ko03010 Ribosome;	IPR023573;	Ribosomal protein 50S-L18Ae/60S-L20/60S-L18A;
CL10643Contig1_orf1	cytochrome c oxidase assembly protein COX15	45.297	1.13984	1.14745	0.998232	1.0083	0.946042	0.958581	0.898684	0.898143	0.956773	0.911634	1.04846	1.02695	plasma membrane	cofactor biosynthetic process; pigment biosynthetic process; heme a biosynthetic process; cellular aromatic compound metabolic process; heme biosynthetic process; single-organism process; biosynthetic process; organonitrogen compound biosynthetic process; heme metabolic process; cellular metabolic process; organic substance metabolic process; metabolic process; porphyrin-containing compound metab…	intrinsic component of membrane; membrane; integral component of membrane; membrane part;	oxidoreductase activity, acting on the CH-CH group of donors; catalytic activity; oxidoreductase activity;	K02259	COX15; cytochrome c oxidase assembly protein subunit 15	ko01110 Biosynthesis of secondary metabolites; ko00190 Oxidative phosphorylation; ko01100 Metabolic pathways; ko00860 Porphyrin and chlorophyll metabolism; ko02020 Two-component system;
CL10647Contig1_orf1	lysosome membrane protein 2-like	58.644	0.967194	0.985769	0.795576	0.868666	0.921089	0.894493	1.0781	1.16485	1.09407	1.12002	1.28183	1.13318	plasma membrane		membrane;
CL10654Contig1_orf1	vanin-like protein 1	60.321	1.14832	1.12219	0.631897	0.685362	0.740081	0.794272	1.18776	1.13606	1.36529	1.34853	1.26257	1.17071	plasma membrane	nitrogen compound metabolic process; metabolic process;		hydrolase activity; catalytic activity; hydrolase activity, acting on carbon-nitrogen (but not peptide) bonds;	K08069	VNN; pantetheine hydrolase [EC:3.5.1.92]	ko00770 Pantothenate and CoA biosynthesis;	IPR003010;	Carbon-nitrogen hydrolase;
CL10661Contig1_orf1	ATP synthase subunit g	16.481	0.783383	0.74509	1.2628	1.31563	1.10034	1.20679	0.920788	0.851654	0.754243	0.738594	0.9552	0.868979	endoplasmic reticulum	nucleoside metabolic process; purine nucleoside metabolic process; purine ribonucleoside monophosphate metabolic process; nucleotide metabolic process; single-organism process; purine ribonucleoside biosynthetic process; nucleoside biosynthetic process; biosynthetic process; ribonucleoside monophosphate biosynthetic process; cellular metabolic process; phosphate-containing compound metabolic proc…	intracellular organelle; membrane; mitochondrial part; organelle membrane; organelle envelope; intracellular organelle part; cytoplasm; macromolecular complex; intracellular part; mitochondrial proton-transporting ATP synthase complex, coupling factor F(o); cell; mitochondrial membrane part; proton-transporting ATP synthase complex; mitochondrion; organelle part; intracellular membrane-bounded or…	ion transmembrane transporter activity; substrate-specific transporter activity; monovalent inorganic cation transmembrane transporter activity; inorganic cation transmembrane transporter activity; hydrogen ion transmembrane transporter activity; cation transmembrane transporter activity; substrate-specific transmembrane transporter activity; transporter activity; transmembrane transporter activi…	K02140	ATPeFG; F-type H+-transporting ATPase subunit g	ko00190 Oxidative phosphorylation; ko01100 Metabolic pathways;
CL10662Contig1_orf1	CDGSH iron sulfur domain-containing protein 2-like protein	18.209	1.5346	1.40473	1.21527	1.21182	0.929101	0.91793	0.912677	0.887773	0.725805	0.662386	0.679596	0.794543	plasma membrane		intracellular membrane-bounded organelle; organelle; intracellular organelle; cell part; intracellular; intracellular part; membrane-bounded organelle; cell;	2 iron, 2 sulfur cluster binding; binding; iron-sulfur cluster binding; metal cluster binding;				IPR018967;	Iron sulphur-containing domain, CDGSH-type;
CL10673Contig1_orf1	dolichyl-diphosphooligosaccharide--protein glycosyltransferase subunit STT3B	88.43	0.787425	0.74781	1.50469	1.4595	1.31685	1.34382	0.72265	0.622276	0.598807	0.521587	0.675297	0.798475	plasma membrane	protein glycosylation; macromolecule glycosylation; glycoprotein biosynthetic process; single-organism cellular process; cellular protein metabolic process; glycoprotein metabolic process; single-organism process; biosynthetic process; primary metabolic process; carbohydrate metabolic process; cellular metabolic process; organic substance biosynthetic process; cellular biosynthetic process; organ…	membrane;	transferase activity, transferring glycosyl groups; transferase activity, transferring hexosyl groups; catalytic activity; transferase activity; oligosaccharyl transferase activity;	K07151	STT3; dolichyl-diphosphooligosaccharide--protein glycosyltransferase [EC:2.4.99.18]	ko04141 Protein processing in endoplasmic reticulum; ko00513 Various types of N-glycan biosynthesis; ko01100 Metabolic pathways; ko00510 N-Glycan biosynthesis;
CL10675Contig1_orf1	glycogen synthase kinase-3 beta isoform X3	46.546	1.02226		1.04012		1.04275		1.04313		0.850485		0.960284		nuclear	phosphorylation; cellular protein metabolic process; primary metabolic process; cellular metabolic process; phosphate-containing compound metabolic process; organic substance metabolic process; metabolic process; protein phosphorylation; phosphorus metabolic process; cellular macromolecule metabolic process; cellular protein modification process; protein metabolic process; macromolecule metabolic…		ATP binding; nucleoside phosphate binding; phosphotransferase activity, alcohol group as acceptor; nucleoside binding; ion binding; protein kinase activity; nucleotide binding; organic cyclic compound binding; heterocyclic compound binding; ribonucleoside binding; carbohydrate derivative binding; kinase activity; catalytic activity; ribonucleotide binding; binding; purine ribonucleoside binding; …	K03083	GSK3B; glycogen synthase kinase 3 beta [EC:2.7.11.26]	ko04711 Circadian rhythm - fly; ko04722 Neurotrophin signaling pathway; ko04390 Hippo signaling pathway; ko04151 PI3K-Akt signaling pathway; ko05200 Pathways in cancer; ko05217 Basal cell carcinoma; ko05210 Colorectal cancer; ko04110 Cell cycle; ko04916 Melanogenesis; ko04062 Chemokine signaling pathway; ko04932 Non-alcoholic fatty liver disease (NAFLD); ko05166 HTLV-I infection; ko04341 Hedgehog…	IPR000719; IPR011009;	Protein kinase domain; Protein kinase-like domain;
CL10677Contig1_orf1	Membrane magnesium transporter 1-B	14.376	0.816751	0.779676	1.57678	1.60619	1.568	1.47103	0.509545	0.38743	0.448657	0.427325	0.517555	0.633189	plasma membrane
CL10684Contig1_orf1	hypothetical protein HELRODRAFT_186162	59.453	0.591251	0.608062	1.67141	1.58044	1.65965	1.57389	0.504471	0.539827	0.490317	0.525148	0.45491	0.473369	cytosol	protein folding; metabolic process; cellular protein metabolic process; cellular macromolecule metabolic process; macromolecule metabolic process; protein metabolic process; primary metabolic process; cellular process; cellular metabolic process; organic substance metabolic process;		ATP binding; nucleoside phosphate binding; nucleoside binding; ion binding; protein binding; nucleotide binding; organic cyclic compound binding; heterocyclic compound binding; ribonucleoside binding; carbohydrate derivative binding; ribonucleotide binding; binding; purine ribonucleoside binding; anion binding; purine ribonucleotide binding; unfolded protein binding; adenyl ribonucleotide binding…	K09496			IPR027410; IPR027409; IPR027413;	TCP-1-like chaperonin intermediate domain; GroEL-like apical domain; GroEL-like equatorial domain;
CL10685Contig1_orf1	stromal cell-derived factor 2	24.862	0.858026	0.915092	1.12484	1.15531	1.09704	1.05161	0.990981	1.0528	0.845256	0.741308	0.986275	1.07275	extracellular		membrane;					IPR016093;	MIR motif;
CL10689Contig1_orf1AF425673_1	lysozyme	21.268													mitochondria			lysozyme activity; hydrolase activity, hydrolyzing O-glycosyl compounds; hydrolase activity; catalytic activity; hydrolase activity, acting on glycosyl bonds;	K13915	LYZ; lysozyme C [EC:3.2.1.17]	ko04970 Salivary secretion;	IPR023346;	Lysozyme-like domain;
CL10696Contig1_orf1	proteoliaisin	26.883	0.844135	0.985476	0.737441	1.1107	0.739705	0.860094	1.3802	0.864531	1.61358	1.14581	0.960038	1.04613	extracellular			protein binding; binding;
CL10697Contig2_orf1	GA17416	82.51	1.32839		0.855218		1.11175		0.90779		0.758241		1.01402		plasma membrane	transport; localization; establishment of localization;	membrane;	protein binding; binding; transporter activity;				IPR020846; IPR002350;	Major facilitator superfamily domain; Kazal domain;
CL10713Contig1_orf1	hypothetical protein DAPPUDRAFT_308310	119.45	0.827196	0.854586	1.37154	1.0532	1.18977	1.08655	0.73929	0.93311	0.835544	0.949996	0.767219	0.831523	cytosol	sulfur compound metabolic process; cofactor biosynthetic process; tricarboxylic acid metabolic process; acyl-CoA biosynthetic process; small molecule metabolic process; thioester metabolic process; single-organism cellular process; single-organism process; coenzyme metabolic process; biosynthetic process; acetyl-CoA metabolic process; organic substance biosynthetic process; cellular metabolic pro…		ATP binding; nucleoside phosphate binding; transferase activity, transferring acyl groups, acyl groups converted into alkyl on transfer; nucleoside binding; ion binding; nucleotide binding; cofactor binding; ATP citrate synthase activity; organic cyclic compound binding; heterocyclic compound binding; ribonucleoside binding; transferase activity, transferring acyl groups; carbohydrate derivative …	K01648	ACLY; ATP citrate (pro-S)-lyase [EC:2.3.3.8]	ko00020 Citrate cycle (TCA cycle); ko00720 Carbon fixation pathways in prokaryotes; ko01120 Microbial metabolism in diverse environments; ko01130 Biosynthesis of antibiotics; ko01110 Biosynthesis of secondary metabolites; ko01100 Metabolic pathways;	IPR013650; IPR016143; IPR016142; IPR005811; IPR032263; IPR016040; IPR013816; IPR003781; IPR016102;	ATP-grasp fold, succinyl-CoA synthetase-type; Citrate synthase-like, small alpha subdomain; Citrate synthase-like, large alpha subdomain; ATP-citrate lyase/succinyl-CoA ligase; ATP-citrate synthase, citrate-binding domain; NAD(P)-binding domain; ATP-grasp fold, subdomain 2; CoA-binding; Succinyl-CoA synthetase-like;
CL10714Contig1_orf1	FAD-dependent oxidoreductase domain-containing protein 1	64.685													nuclear	single-organism process; metabolic process; oxidation-reduction process; single-organism metabolic process;		catalytic activity; oxidoreductase activity;	K18166			IPR006076; IPR023753;	FAD dependent oxidoreductase; FAD/NAD(P)-binding domain;
CL10716Contig1_orf1	H+ transporting ATP synthase O subunit	23.662	0.751593	0.749437	1.28441	1.32378	1.92023	1.85721	0.504686	0.466892	0.472161	0.444833	0.491329	0.387262	cytosol	nucleoside metabolic process; purine nucleoside metabolic process; purine ribonucleoside monophosphate metabolic process; nucleotide metabolic process; single-organism process; purine ribonucleoside biosynthetic process; nucleoside biosynthetic process; biosynthetic process; ribonucleoside monophosphate biosynthetic process; cellular metabolic process; phosphate-containing compound metabolic proc…		active transmembrane transporter activity; ATPase activity, coupled to transmembrane movement of ions; ion transmembrane transporter activity; primary active transmembrane transporter activity; ATPase activity, coupled to transmembrane movement of ions, rotational mechanism; hydrolase activity, acting on acid anhydrides; substrate-specific transporter activity; monovalent inorganic cation transme…	K02137	ATPeF0O; F-type H+-transporting ATPase subunit O	ko05010 Alzheimer's disease; ko00190 Oxidative phosphorylation; ko01100 Metabolic pathways; ko05016 Huntington's disease; ko05012 Parkinson's disease;	IPR026015;	F1F0 ATP synthase OSCP/delta subunit, N-terminal domain;
CL10731Contig1_orf1	vacuolar-H-ATPase H	55.782	1.08314	1.12839	1.24799	1.25351	1.00827	1.00954	0.891809	0.883495	0.888306	0.807875	0.741757	0.77864	cytosol	ion transmembrane transport; cation transmembrane transport; inorganic ion transmembrane transport; single-organism cellular process; energy coupled proton transmembrane transport, against electrochemical gradient; single-organism process; hydrogen transport; proton transport; establishment of localization; transport; transmembrane transport; single-organism localization; cation transport; ion tr…	membrane; intracellular organelle; bounding membrane of organelle; organelle membrane; cytoplasm; intracellular organelle part; macromolecular complex; intracellular part; proton-transporting V-type ATPase complex; cell; organelle part; proton-transporting V-type ATPase, V1 domain; vacuolar proton-transporting V-type ATPase complex; intracellular membrane-bounded organelle; organelle; intracellul…	active transmembrane transporter activity; ATPase activity, coupled to transmembrane movement of ions; ion transmembrane transporter activity; primary active transmembrane transporter activity; substrate-specific transporter activity; ATPase activity, coupled to transmembrane movement of ions, rotational mechanism; hydrolase activity, acting on acid anhydrides; monovalent inorganic cation transme…	K02144	ATPeV1H; V-type H+-transporting ATPase subunit H	ko04721 Synaptic vesicle cycle; ko04145 Phagosome; ko01100 Metabolic pathways; ko05323 Rheumatoid arthritis; ko05120 Epithelial cell signaling in Helicobacter pylori infection; ko04150 mTOR signaling pathway; ko00190 Oxidative phosphorylation; ko04142 Lysosome; ko05152 Tuberculosis; ko05110 Vibrio cholerae infection;	IPR011987; IPR011989; IPR016024;	ATPase, V1 complex, subunit H, C-terminal; Armadillo-like helical; Armadillo-type fold;
CL10732Contig1_orf1	ribosomal protein L17 isoform B	21.441	1.07642	1.02359	1.31285	1.40033	1.07052	1.17784	0.620132	0.538644	0.693458	0.60544	0.860837	0.736659	cytosol	cellular protein metabolic process; biosynthetic process; primary metabolic process; cellular metabolic process; organic substance biosynthetic process; cellular biosynthetic process; organic substance metabolic process; metabolic process; cellular macromolecule biosynthetic process; cellular macromolecule metabolic process; gene expression; macromolecule metabolic process; protein metabolic proc…	ribosome; intracellular organelle; intracellular non-membrane-bounded organelle; intracellular organelle part; cytoplasm; macromolecular complex; intracellular part; cell; organelle part; non-membrane-bounded organelle; organelle; large ribosomal subunit; intracellular; cell part; ribosomal subunit; ribonucleoprotein complex; cytoplasmic part;	structural constituent of ribosome; structural molecule activity;	K02880	RP-L17e; large subunit ribosomal protein L17e	ko03010 Ribosome;
CL10757Contig1_orf1	proteasome subunit alpha type-1-like	35.851	0.854189	0.80683	0.898181	1.0768	0.909983	1.28085	0.975681	0.673835	1.13073	1.01	0.900581	0.913521	mitochondria	modification-dependent macromolecule catabolic process; proteolysis involved in cellular protein catabolic process; cellular macromolecule catabolic process; cellular protein catabolic process; modification-dependent protein catabolic process; cellular protein metabolic process; ubiquitin-dependent protein catabolic process; primary metabolic process; cellular metabolic process; organic substance…	proteasome core complex, alpha-subunit complex; proteasome complex; cell part; intracellular; proteasome core complex; macromolecular complex; intracellular part; cell; protein complex;	endopeptidase activity; threonine-type endopeptidase activity; peptidase activity; threonine-type peptidase activity; catalytic activity; peptidase activity, acting on L-amino acid peptides; hydrolase activity;	K02725	PSMA1; 20S proteasome subunit alpha 6 [EC:3.4.25.1]	ko03050 Proteasome;	IPR029055; IPR000426;	Nucleophile aminohydrolases, N-terminal; Proteasome alpha-subunit, N-terminal domain;
CL10775Contig1_orf1	estradiol 17-beta-dehydrogenase 12	36.53	0.929307		1.10678		1.37859		0.670651		0.930845		0.745613		cytosol			catalytic activity; oxidoreductase activity;	K10251	HSD17B12; 17beta-estradiol 17-dehydrogenase / very-long-chain 3-oxoacyl-CoA reductase [EC:1.1.1.62 1.1.1.330]	ko01110 Biosynthesis of secondary metabolites; ko01212 Fatty acid metabolism; ko01100 Metabolic pathways; ko00062 Fatty acid elongation; ko00140 Steroid hormone biosynthesis; ko01040 Biosynthesis of unsaturated fatty acids;	IPR016040;	NAD(P)-binding domain;
CL10794Contig1_orf1	Similar to CG4692	14.043	0.86523	0.87134	1.23979	1.2498	1.07892	1.03395	0.920658	0.882561	0.731111	0.748641	0.984505	0.929656	cytosol, nuclear				K02130	ATPeF0F; F-type H+-transporting ATPase subunit f	ko00190 Oxidative phosphorylation; ko01100 Metabolic pathways;
CL10816Contig1_orf1	putative ribosomal protein S23e	17.777	1.08308	1.03216	1.1599	1.22937	1.08308	1.00546	0.711218	0.856329	0.701245	0.833614	0.901342	0.885522	cytosol	cellular protein metabolic process; biosynthetic process; primary metabolic process; cellular metabolic process; organic substance biosynthetic process; cellular biosynthetic process; organic substance metabolic process; metabolic process; cellular macromolecule biosynthetic process; cellular macromolecule metabolic process; gene expression; macromolecule metabolic process; protein metabolic proc…	ribosome; intracellular organelle; intracellular non-membrane-bounded organelle; small ribosomal subunit; intracellular organelle part; cytoplasm; macromolecular complex; intracellular part; cell; organelle part; non-membrane-bounded organelle; organelle; ribosomal subunit; intracellular; cell part; ribonucleoprotein complex; cytoplasmic part;	structural constituent of ribosome; structural molecule activity;	K02973	RP-S23e; small subunit ribosomal protein S23e	ko03010 Ribosome;	IPR012340;	Nucleic acid-binding, OB-fold;
CL10821Contig1_orf1	Puromycin-sensitive aminopeptidase	99.783	1.09653	1.06877	0.940176	1.0424	1.05419	1.08842	0.85057	0.884669	0.988328	0.997109	0.818977	0.83023	cytosol			peptidase activity; transition metal ion binding; catalytic activity; binding; ion binding; peptidase activity, acting on L-amino acid peptides; metal ion binding; cation binding; hydrolase activity; metallopeptidase activity; zinc ion binding;	K08776			IPR014782; IPR024571;	Peptidase M1, membrane alanine aminopeptidase, N-terminal; ERAP1-like C-terminal domain;
CL10824Contig1_orf1	T-complex protein subunit gamma	62.843		0.738509		1.11698		1.57113		0.61774		0.632594		0.876571	mitochondria	protein folding; metabolic process; cellular protein metabolic process; cellular macromolecule metabolic process; macromolecule metabolic process; protein metabolic process; primary metabolic process; cellular process; cellular metabolic process; organic substance metabolic process;		ATP binding; nucleoside phosphate binding; nucleoside binding; ion binding; protein binding; nucleotide binding; organic cyclic compound binding; heterocyclic compound binding; ribonucleoside binding; carbohydrate derivative binding; ribonucleotide binding; binding; purine ribonucleoside binding; anion binding; purine ribonucleotide binding; unfolded protein binding; adenyl ribonucleotide binding…	K09495			IPR027410; IPR027409; IPR027413;	TCP-1-like chaperonin intermediate domain; GroEL-like apical domain; GroEL-like equatorial domain;
CL10845Contig1_orf1	lectin 3	36.904	0.942961	0.968044	0.684572	0.655497	0.783831	0.783589	1.26161	1.28925	1.63435	1.65858	0.949963	0.911083	extracellular							IPR001304; IPR016187; IPR016186;	C-type lectin-like; C-type lectin fold; C-type lectin-like/link domain;
CL10847Contig1_orf1	hypothetical protein DAPPUDRAFT_215063	75.393	1.62987	1.79142	0.999952	1.02289	0.809363	0.833061	1.32602	1.12515	0.668048	0.655136	0.626102	0.557862	plasma membrane	transport; transmembrane transport; single-organism localization; single-organism cellular process; single-organism process; localization; cellular process; single-organism transport; establishment of localization;	membrane;	transporter activity;
CL10849Contig1_orf1	ribose-phosphate pyrophosphokinase 1 isoform X2	40.77	1.01915	0.955332	1.16158	1.21252	1.00916	0.90737	0.981287	0.896361	0.817705	0.966532	0.922453	0.99526	cytosol, nuclear	nucleoside metabolic process; nucleotide biosynthetic process; cellular aromatic compound metabolic process; nucleotide metabolic process; single-organism process; biosynthetic process; ribonucleoside monophosphate biosynthetic process; cellular metabolic process; phosphate-containing compound metabolic process; organic substance metabolic process; metabolic process; heterocycle metabolic process…		magnesium ion binding; ribose phosphate diphosphokinase activity; catalytic activity; binding; ion binding; metal ion binding; cation binding; diphosphotransferase activity; transferase activity; transferase activity, transferring phosphorus-containing groups;	K00948	PRPS; ribose-phosphate pyrophosphokinase [EC:2.7.6.1]	ko00030 Pentose phosphate pathway; ko00230 Purine metabolism; ko01120 Microbial metabolism in diverse environments; ko01130 Biosynthesis of antibiotics; ko01200 Carbon metabolism; ko01110 Biosynthesis of secondary metabolites; ko01230 Biosynthesis of amino acids; ko01100 Metabolic pathways;	IPR000836; IPR029099; IPR029057;	Phosphoribosyltransferase domain; Ribose-phosphate pyrophosphokinase, N-terminal domain; Phosphoribosyltransferase-like;
CL10858Contig1_orf1	cytosolic purine 5&apos	65.752	1.03046	0.966882	1.21834	1.18952	1.01769	1.17717	0.873065	0.773301	1.05329	0.986375	0.765218	0.660156	nuclear				K01081	E3.1.3.5; 5'-nucleotidase [EC:3.1.3.5]	ko00230 Purine metabolism; ko01110 Biosynthesis of secondary metabolites; ko01100 Metabolic pathways; ko00240 Pyrimidine metabolism; ko00760 Nicotinate and nicotinamide metabolism;	IPR023214;	HAD-like domain;
CL10861Contig1_orf1	hypothetical protein DAPPUDRAFT_300984	41.184	1.05895	1.02524	1.49107	1.3069	0.839332	0.820916	0.774775	0.889041	0.918986	0.901245	0.736209	0.980593	mitochondria	metabolic process;		catalytic activity;	K00167	BCKDHB; 2-oxoisovalerate dehydrogenase E1 component beta subunit [EC:1.2.4.4]	ko00280 Valine, leucine and isoleucine degradation; ko01130 Biosynthesis of antibiotics; ko01110 Biosynthesis of secondary metabolites; ko01100 Metabolic pathways; ko00640 Propanoate metabolism;	IPR009014; IPR033248; IPR029061; IPR005475;	Transketolase C-terminal/Pyruvate-ferredoxin oxidoreductase domain II; Transketolase, C-terminal domain; Thiamin diphosphate-binding fold; Transketolase-like, pyrimidine-binding domain;
CL10872Contig1_orf1	laminin receptor	35.06	1.09546	0.999194	1.06806	1.16573	0.999954	1.10689	0.848627	0.829463	0.923514	0.928923	0.970096	0.879663	cytosol	cellular protein metabolic process; biosynthetic process; primary metabolic process; cellular metabolic process; organic substance biosynthetic process; cellular biosynthetic process; organic substance metabolic process; metabolic process; cellular macromolecule biosynthetic process; cellular macromolecule metabolic process; gene expression; macromolecule metabolic process; protein metabolic proc…	ribosome; intracellular organelle; intracellular non-membrane-bounded organelle; small ribosomal subunit; intracellular organelle part; cytoplasm; macromolecular complex; intracellular part; cell; organelle part; non-membrane-bounded organelle; organelle; ribosomal subunit; intracellular; cell part; ribonucleoprotein complex; cytoplasmic part;	structural constituent of ribosome; structural molecule activity;	K02998	RP-SAe; small subunit ribosomal protein SAe	ko03010 Ribosome;	IPR023591;	Ribosomal protein S2, flavodoxin-like domain;
CL10875Contig1_orf1	mitochondrial cytochrome c oxidase subunit VIb	13.286	0.967899	0.964883	1.29314	1.19628	1.22924	1.24573	0.656225	0.753692	0.706504	0.747578	0.771887	0.786955	extracellular		organelle; intracellular membrane-bounded organelle; intracellular organelle; cell part; intracellular; cytoplasm; intracellular part; membrane-bounded organelle; cell; mitochondrion; cytoplasmic part;	ion transmembrane transporter activity; substrate-specific transporter activity; monovalent inorganic cation transmembrane transporter activity; oxidoreductase activity, acting on a heme group of donors, oxygen as acceptor; oxidoreductase activity, acting on a heme group of donors; hydrogen ion transmembrane transporter activity; heme-copper terminal oxidase activity; oxidoreductase activity; sub…	K02267	COX6B; cytochrome c oxidase subunit 6b	ko04260 Cardiac muscle contraction; ko05010 Alzheimer's disease; ko00190 Oxidative phosphorylation; ko01100 Metabolic pathways; ko05016 Huntington's disease; ko04932 Non-alcoholic fatty liver disease (NAFLD); ko05012 Parkinson's disease;
CL10883Contig1_orf1	hypothetical protein DAPPUDRAFT_231749	17.452	0.868262	0.949838	1.69504	1.41362	1.49004	1.1609	0.445069	0.707567	0.440584	0.617668	0.468635	0.780973	cytosol	protein folding; metabolic process; cellular protein metabolic process; cellular macromolecule metabolic process; macromolecule metabolic process; protein metabolic process; primary metabolic process; cellular process; cellular metabolic process; organic substance metabolic process;			K09568			IPR001179;	FKBP-type peptidyl-prolyl cis-trans isomerase domain;
CL10892Contig1_orf1	proliferation-associated protein 2G4	43.644	0.957008	0.878314	1.21444	1.33706	1.18481	1.14328	0.754044	0.619413	0.804725	0.752201	0.82199	0.775145	nuclear							IPR011991; IPR000994;	Winged helix-turn-helix DNA-binding domain; Peptidase M24;
CL10898Contig1_orf1	hypothetical protein DAPPUDRAFT_327039	73.868	1.21172	1.20036	0.952385	0.938928	0.853203	0.84234	0.714812	0.781767	1.23493	1.21837	1.05162	1.06732	endoplasmic reticulum			peptidase activity; exopeptidase activity; catalytic activity; metalloaminopeptidase activity; metalloexopeptidase activity; peptidase activity, acting on L-amino acid peptides; aminopeptidase activity; hydrolase activity; metallopeptidase activity;	K01262			IPR029149; IPR000994; IPR033740; IPR028980; IPR000587; IPR032416;	Creatinase/Aminopeptidase P/Spt16, N-terminal; Peptidase M24; Aminopeptidase P; Creatinase/Aminopeptidase P, N-terminal; Creatinase, N-terminal; Peptidase M24, C-terminal domain;
CL108Contig5_orf1	hypothetical protein X975_10684, partial	43.979	0.918593	1.05318	0.918539	0.872178	1.01701	1.07498	0.960368	1.11329	1.11364	0.841157	1.10759	1.07498	extracellular							IPR007484;	Peptidase M28;
CL10900Contig1_orf1	transketolase-like protein 2 isoform X1	71.504	0.771301	0.712666	1.40327	1.40276	1.14768	1.35611	0.703236	0.508471	0.842018	0.747124	0.834796	0.805303	cytosol	metabolic process;		catalytic activity;	K00615	E2.2.1.1; transketolase [EC:2.2.1.1]	ko00030 Pentose phosphate pathway; ko01130 Biosynthesis of antibiotics; ko01110 Biosynthesis of secondary metabolites; ko00710 Carbon fixation in photosynthetic organisms; ko01230 Biosynthesis of amino acids; ko01100 Metabolic pathways; ko01120 Microbial metabolism in diverse environments; ko01200 Carbon metabolism; ko01051 Biosynthesis of ansamycins;	IPR005474; IPR009014; IPR033248; IPR005475; IPR029061;	Transketolase, N-terminal; Transketolase C-terminal/Pyruvate-ferredoxin oxidoreductase domain II; Transketolase, C-terminal domain; Transketolase-like, pyrimidine-binding domain; Thiamin diphosphate-binding fold;
CL10926Contig1_orf1	translation initiation factor 2 gamma subunit	51.805	1.08628	1.04158	0.974884	1.01473	1.04879	0.993608	0.903811	0.930303	1.00673	0.987902	1.09574	1.03178	cytosol			nucleoside phosphate binding; nucleoside binding; ion binding; hydrolase activity, acting on acid anhydrides; hydrolase activity; nucleotide binding; nucleoside-triphosphatase activity; organic cyclic compound binding; heterocyclic compound binding; ribonucleoside binding; carbohydrate derivative binding; pyrophosphatase activity; catalytic activity; ribonucleotide binding; binding; GTPase activi…	K11419	SUV39H; histone-lysine N-methyltransferase SUV39H [EC:2.1.1.43]	ko00310 Lysine degradation;	IPR004161; IPR009001; IPR015256; IPR027417; IPR000795; IPR009000;	Translation elongation factor EFTu-like, domain 2; Translation elongation factor EF1A/initiation factor IF2gamma, C-terminal; Translation initiation factor 2, gamma subunit, C-terminal; P-loop containing nucleoside triphosphate hydrolase; Transcription factor, GTP-binding domain; Translation protein, beta-barrel domain;
CL1092Contig6_orf1	neurobeachin isoform X10	369.04	1.09258	0.897114	1.05276	1.1696	1.04312	1.08356	0.995754	0.934023	0.869296	0.888823	0.892251	0.970331	plasma membrane			protein binding; binding;				IPR000409; IPR011989; IPR013320; IPR031570; IPR017986; IPR011993; IPR015943; IPR016024; IPR023362; IPR010508;	BEACH domain; Armadillo-like helical; Concanavalin A-like lectin/glucanase domain; Domain of unknown function DUF4704; WD40-repeat-containing domain; PH domain-like; WD40/YVTN repeat-like-containing domain; Armadillo-type fold; PH-BEACH domain; Domain of unknown function DUF1088;
CL10934Contig1_orf1	probable peroxisomal acyl-coenzyme A oxidase 1	76.456	1.00761	0.930609	1.09125	1.09924	1.23658	1.25666	0.777936	0.68094	0.85481	0.746075	0.910738	0.838208	cytosol, nuclear	lipid oxidation; single-organism process; cellular lipid metabolic process; cellular metabolic process; organic substance metabolic process; metabolic process; lipid modification; cellular catabolic process; monocarboxylic acid metabolic process; cellular process; lipid metabolic process; lipid catabolic process; fatty acid oxidation; oxidation-reduction process; single-organism catabolic process…	organelle; intracellular membrane-bounded organelle; intracellular organelle; cell part; intracellular; peroxisome; microbody; cytoplasm; intracellular part; cell; membrane-bounded organelle; cytoplasmic part;	oxidoreductase activity, acting on the CH-CH group of donors, oxygen as acceptor; nucleoside phosphate binding; flavin adenine dinucleotide binding; ion binding; acyl-CoA oxidase activity; nucleotide binding; cofactor binding; oxidoreductase activity; oxidoreductase activity, acting on the CH-CH group of donors; heterocyclic compound binding; organic cyclic compound binding; catalytic activity; b…	K00232	E1.3.3.6; acyl-CoA oxidase [EC:1.3.3.6]	ko00592 alpha-Linolenic acid metabolism; ko00071 Fatty acid degradation; ko01110 Biosynthesis of secondary metabolites; ko01100 Metabolic pathways; ko03320 PPAR signaling pathway; ko04146 Peroxisome; ko01212 Fatty acid metabolism; ko04024 cAMP signaling pathway; ko01040 Biosynthesis of unsaturated fatty acids;	IPR029320; IPR013786; IPR009100; IPR002655; IPR009075;	Acyl-coenzyme A oxidase, N-terminal; Acyl-CoA dehydrogenase/oxidase, N-terminal; Acyl-CoA dehydrogenase/oxidase, N-terminal and middle domain; Acyl-CoA oxidase, C-terminal; Acyl-CoA dehydrogenase/oxidase C-terminal;
CL10941Contig1_orf1	zinc proteinase Mpc1	29.65	0.902487	0.968371	0.48911	0.659353	0.612812	0.714833	1.25726	1.27234	1.9361	1.76913	1.27522	1.03615	extracellular	proteolysis; metabolic process; macromolecule metabolic process; protein metabolic process; primary metabolic process; organic substance metabolic process;		endopeptidase activity; metalloendopeptidase activity; peptidase activity; transition metal ion binding; catalytic activity; binding; ion binding; cation binding; metal ion binding; peptidase activity, acting on L-amino acid peptides; hydrolase activity; metallopeptidase activity; zinc ion binding;				IPR024079; IPR001506; IPR034035; IPR006026;	Metallopeptidase, catalytic domain; Peptidase M12A; Astacin-like metallopeptidase domain; Peptidase, metallopeptidase;
CL10947Contig1_orf1	ribosomal protein S19	21.72	0.818243		0.517045		0.765311		1.0244		2.58929		0.703244		mitochondria	cellular protein metabolic process; biosynthetic process; primary metabolic process; cellular metabolic process; organic substance biosynthetic process; cellular biosynthetic process; organic substance metabolic process; metabolic process; cellular macromolecule biosynthetic process; cellular macromolecule metabolic process; gene expression; macromolecule metabolic process; protein metabolic proc…	ribosome; organelle; intracellular organelle; intracellular non-membrane-bounded organelle; cell part; intracellular; cytoplasm; macromolecular complex; intracellular part; cell; ribonucleoprotein complex; cytoplasmic part; non-membrane-bounded organelle;	structural constituent of ribosome; structural molecule activity;	K02966	RP-S19e; small subunit ribosomal protein S19e	ko03010 Ribosome;	IPR011991;	Winged helix-turn-helix DNA-binding domain;
CL10961Contig1_orf1	signal sequence receptor beta-like protein	25.423	1.05818	1.03311	1.29169	1.26968	1.05739	1.03549	0.920969	0.918553	0.708019	0.772192	0.783055	0.779331	plasma membrane		membrane; intracellular organelle; endoplasmic reticulum; cytoplasm; intrinsic component of membrane; endomembrane system; intracellular part; cell; integral component of membrane; intracellular membrane-bounded organelle; organelle; intracellular; cell part; membrane part; membrane-bounded organelle; cytoplasmic part;		K13250	SSR2; translocon-associated protein subunit beta	ko04141 Protein processing in endoplasmic reticulum;	IPR013783;	Immunoglobulin-like fold;
CL10964Contig1_orf1	neuroplastin isoform X1	32.232	1.08115	1.0096	1.49812	1.36752	1.30448	1.27029	0.397104	0.520263	0.739087	0.77085	0.509796	0.517914	plasma membrane			protein binding; binding;				IPR003598; IPR007110; IPR013783; IPR003599; IPR013151;	Immunoglobulin subtype 2; Immunoglobulin-like domain; Immunoglobulin-like fold; Immunoglobulin subtype; Immunoglobulin;
CL10965Contig1_orf1	PDGF/VEGF-related factor 1	23.687	0.660127	0.54992	1.32803	1.33997	1.46543	1.66733	0.738935	0.643427	0.641863	0.569112	0.798512	0.629132	extracellular							IPR029034;	Cystine-knot cytokine;
CL10969Contig1_orf1	Kazal-type serine proteinase inhibitor 4	21.726	0.989353		0.828051		0.731393		1.10664		1.42824		1.14042		plasma membrane			protein binding; binding;				IPR002350;	Kazal domain;
CL10975Contig1_orf1	glutaredoxin-3	36.517	0.948718	0.966368	1.04483	0.925449	1.20173	1.12619	0.898074	0.90582	0.859695	0.907109	0.92748	1.12175	nuclear	regulation of cellular process; homeostatic process; regulation of biological quality; regulation of biological process; cell redox homeostasis; single-organism cellular process; cellular homeostasis; single-organism process; cellular process; biological regulation;		electron carrier activity; protein disulfide oxidoreductase activity; oxidoreductase activity, acting on a sulfur group of donors; disulfide oxidoreductase activity; catalytic activity; oxidoreductase activity;				IPR033658; IPR002109; IPR013766; IPR012336;	Glutaredoxin, PICOT-like; Glutaredoxin; Thioredoxin domain; Thioredoxin-like fold;
CL10991Contig1_orf1	hypothetical protein DAPPUDRAFT_302804	51.81	1.01779	1.01079	1.00541	1.02184	1.02463	1.00907	0.907526	0.899301	1.12565	1.0556	1.02677	0.970157	cytosol, nuclear		cell part; intracellular; cytoplasm; macromolecular complex; intracellular part; protein complex; cell; cytoplasmic part; eukaryotic translation initiation factor 3 complex;	organic cyclic compound binding; heterocyclic compound binding; RNA binding; translation factor activity, nucleic acid binding; binding; nucleic acid binding; translation initiation factor activity; protein binding;	K03250	EIF3E; translation initiation factor 3 subunit E	ko05160 Hepatitis C; ko03013 RNA transport;	IPR011991; IPR000717; IPR019010;	Winged helix-turn-helix DNA-binding domain; Proteasome component (PCI) domain; Eukaryotic translation initiation factor 3 subunit E, N-terminal;
CL10996Contig1_orf1	metalloreductase STEAP3	52.605	0.818574		0.678388		0.731673		1.25283		1.56187		1.27886		plasma membrane							IPR028939; IPR016040; IPR013130;	Pyrroline-5-carboxylate reductase, catalytic, N-terminal; NAD(P)-binding domain; Ferric reductase transmembrane component-like domain;
CL10999Contig1_orf1	hypothetical protein CAPTEDRAFT_184037	46.094	0.934212	1.06781	0.857392	1.07316	1.30159	0.864165	1.00378	1.09452	0.829405	0.953318	1.00514	0.995566	cytosol	small molecule metabolic process; single-organism cellular process; single-organism process; nitrogen compound metabolic process; primary metabolic process; cellular metabolic process; organic substance metabolic process; metabolic process; cellular amino acid metabolic process; single-organism metabolic process; carboxylic acid metabolic process; proteolysis; macromolecule metabolic process; pro…	intracellular part; cell; cell part; intracellular; cytoplasm;	peptidase activity, acting on L-amino acid peptides; metallopeptidase activity; peptidase activity; hydrolase activity; aminoacylase activity; hydrolase activity, acting on carbon-nitrogen (but not peptide) bonds, in linear amides; catalytic activity; hydrolase activity, acting on carbon-nitrogen (but not peptide) bonds;	K14677	ACY1; aminoacylase [EC:3.5.1.14]	ko01130 Biosynthesis of antibiotics; ko00220 Arginine biosynthesis; ko01110 Biosynthesis of secondary metabolites; ko01230 Biosynthesis of amino acids; ko01100 Metabolic pathways; ko01210 2-Oxocarboxylic acid metabolism;	IPR011650;	Peptidase M20, dimerisation domain;
CL11000Contig1_orf1	dehydrogenase/reductase SDR family member 11	28.175		1.14701		1.17848		1.03117		0.726065		1.11456		0.622296	mitochondria			catalytic activity; oxidoreductase activity;	K15890	FOHSDR; NADP+-dependent farnesol dehydrogenase [EC:1.1.1.216]	ko01130 Biosynthesis of antibiotics; ko00981 Insect hormone biosynthesis; ko00900 Terpenoid backbone biosynthesis;	IPR016040;	NAD(P)-binding domain;
CL11001Contig1_orf1	ES1 protein homolog, mitochondrial precursor	28.327	0.725854	0.752262	1.03477	1.01377	0.992409	0.928975	1.16765	1.16562	1.22337	1.24166	1.06799	1.00569	mitochondria							IPR029062;	Class I glutamine amidotransferase-like;
CL11003Contig1_orf1	GL15894	12.048	0.977345	1.02329	0.944061	0.955916	1.41725	1.3344	0.803187	0.769254	0.857246	0.841473	0.82497	0.848898	cytosol							IPR007667;	Hypoxia induced protein, domain;
CL11009Contig1_orf1	uncharacterized protein LOC105389192	23.99	1.03076	0.976856	0.889684	0.923038	1.11184	0.967102	0.924296	0.911297	0.991137	1.05804	1.04431	1.2202	plasma membrane
CL11022Contig1_orf1	transmembrane protein 208-like	21.182	1.05678	1.03566	0.992118	1.01053	0.984826	0.921664	0.940765	1.02427	1.04348	1.04202	0.985137	1.05651	plasma membrane
CL11042Contig2_orf1	hypothetical protein LOTGIDRAFT_127454	73.634	0.905641	0.924959	1.1424	1.16207	1.08204	1.10784	0.762311	0.737485	1.07586	1.0937	0.765671	0.742515	mitochondria	lipid oxidation; single-organism process; cellular lipid metabolic process; cellular metabolic process; organic substance metabolic process; metabolic process; lipid modification; cellular catabolic process; monocarboxylic acid metabolic process; cellular process; lipid metabolic process; lipid catabolic process; fatty acid oxidation; oxidation-reduction process; single-organism catabolic process…	organelle; intracellular membrane-bounded organelle; intracellular organelle; cell part; intracellular; peroxisome; microbody; cytoplasm; intracellular part; cell; membrane-bounded organelle; cytoplasmic part;	oxidoreductase activity, acting on the CH-CH group of donors, oxygen as acceptor; nucleoside phosphate binding; flavin adenine dinucleotide binding; ion binding; acyl-CoA oxidase activity; nucleotide binding; cofactor binding; oxidoreductase activity; oxidoreductase activity, acting on the CH-CH group of donors; heterocyclic compound binding; organic cyclic compound binding; catalytic activity; b…				IPR009100; IPR006091; IPR002655; IPR009075;	Acyl-CoA dehydrogenase/oxidase, N-terminal and middle domain; Acyl-CoA oxidase/dehydrogenase, central domain; Acyl-CoA oxidase, C-terminal; Acyl-CoA dehydrogenase/oxidase C-terminal;
CL1104Contig3_orf1	uncharacterized protein LOC105698441 isoform X7	94.817													cytosol	regulation of cellular process; single organism signaling; cellular response to stimulus; signal transduction; regulation of biological process; cell communication; intracellular signal transduction; single-organism cellular process; single-organism process; signaling; response to stimulus; cellular process; biological regulation;		protein binding; binding;				IPR002219; IPR000008;	Protein kinase C-like, phorbol ester/diacylglycerol-binding domain; C2 domain;
CL11054Contig1_orf1	hypothetical protein DAPPUDRAFT_308200	48.913	1.27973	1.28153	1.54016	1.47756	0.725693	0.675564	0.539924	0.648651	0.270556	0.306007	1.41266	1.45794	extracellular
CL11058Contig1_orf1	putative GTP cyclohydrolase 1 type 2 NIF3L1	40.91	0.910268	0.931364	1.50304	1.43408	1.36231	1.25708	0.559368	0.575464	0.620066	0.730002	0.610177	0.614319	cytosol
CL11059Contig1_orf1LUCB_OPLGR	RecName: Full=Oplophorus-luciferin 2-monooxygenase non-catalytic subunit	48.803	1.79423	1.90918	0.650398	0.656791	0.686555	0.690878	1.14018	1.08803	1.02209	0.997247	0.870281	0.833791	mitochondria							IPR032675;	Leucine-rich repeat domain, L domain-like;
CL11066Contig1_orf1	mitogen-activated protein kinase kinase	46.943													cytosol	phosphorylation; cellular protein metabolic process; primary metabolic process; cellular metabolic process; phosphate-containing compound metabolic process; organic substance metabolic process; metabolic process; protein phosphorylation; phosphorus metabolic process; cellular macromolecule metabolic process; cellular protein modification process; protein metabolic process; macromolecule metabolic…		ATP binding; nucleoside phosphate binding; phosphotransferase activity, alcohol group as acceptor; nucleoside binding; ion binding; protein kinase activity; nucleotide binding; organic cyclic compound binding; heterocyclic compound binding; ribonucleoside binding; carbohydrate derivative binding; kinase activity; catalytic activity; ribonucleotide binding; binding; purine ribonucleoside binding; …	K04368	MAP2K1; mitogen-activated protein kinase kinase 1 [EC:2.7.12.2]	ko04726 Serotonergic synapse; ko04912 GnRH signaling pathway; ko04722 Neurotrophin signaling pathway; ko04650 Natural killer cell mediated cytotoxicity; ko04810 Regulation of actin cytoskeleton; ko05219 Bladder cancer; ko04320 Dorso-ventral axis formation; ko04666 Fc gamma R-mediated phagocytosis; ko04151 PI3K-Akt signaling pathway; ko04620 Toll-like receptor signaling pathway; ko04914 Progestero…	IPR000719; IPR011009;	Protein kinase domain; Protein kinase-like domain;
CL11070Contig1_orf1	Mitogen-activated protein-binding protein-interacting protein	14.288	0.978609		1.35887		1.15281		0.914999		0.684219		0.66311		extracellular				K20398	LAMTOR2; ragulator complex protein LAMTOR2	ko04150 mTOR signaling pathway;	IPR004942;	Roadblock/LAMTOR2 domain;
CL11071Contig2_orf1	8-lipoxygenase	80.806	0.81052	0.933705	1.27141	1.13356	1.3554	1.13269	0.707748	0.796728	0.700506	0.908112	0.849831	0.845274	cytosol	single-organism process; metabolic process; oxidation-reduction process; single-organism metabolic process;		oxidoreductase activity, acting on single donors with incorporation of molecular oxygen, incorporation of two atoms of oxygen; oxidoreductase activity, acting on single donors with incorporation of molecular oxygen; catalytic activity; binding; dioxygenase activity; ion binding; cation binding; metal ion binding; protein binding; oxidoreductase activity;				IPR001024; IPR013819;	PLAT/LH2 domain; Lipoxygenase, C-terminal;
CL11075Contig1_orf1	dyslexia-associated protein KIAA0319-like protein isoform X1	110.17	0.761157		1.29525		0.880557		0.910847		1.10043		0.981114		plasma membrane							IPR022409; IPR000601; IPR011106;	PKD/Chitinase domain; PKD domain; Seven cysteines, N-terminal;
CL11082Contig1_orf1	Mitochondrial 18 kDa protein-like protein	21.66	0.976446	0.951687	1.02762	1.07414	0.948943	0.880801	0.978642	1.05798	0.987942	0.862806	1.15397	1.15234	cytosol				K17981
CL11086Contig1_orf1	cytosolic MnSOD	32.355	0.962019	0.978288	0.783269	0.79031	0.791658	0.813071	1.28226	1.26944	1.16857	1.17539	1.20668	1.20535	cytosol	superoxide metabolic process; metabolic process; reactive oxygen species metabolic process; oxidation-reduction process; single-organism metabolic process; single-organism process; cellular process; cellular metabolic process;		superoxide dismutase activity; catalytic activity; oxidoreductase activity, acting on superoxide radicals as acceptor; binding; ion binding; antioxidant activity; cation binding; metal ion binding; oxidoreductase activity;				IPR019831; IPR019832;	Manganese/iron superoxide dismutase, N-terminal; Manganese/iron superoxide dismutase, C-terminal;
CL11087Contig1_orf1	mitochondrial acyl carrier protein	18.677	1.01521	0.982669	1.59259	1.39276	1.38369	1.30821	0.367195	0.555034	0.399514	0.552791	0.38785	0.552879	mitochondria	single-organism biosynthetic process; organic acid biosynthetic process; small molecule metabolic process; single-organism cellular process; single-organism process; biosynthetic process; cellular lipid metabolic process; fatty acid metabolic process; primary metabolic process; cellular metabolic process; fatty acid biosynthetic process; organic substance biosynthetic process; cellular biosynthet…			K03955	NDUFAB1; NADH dehydrogenase (ubiquinone) 1 alpha/beta subcomplex 1	ko05010 Alzheimer's disease; ko00190 Oxidative phosphorylation; ko01100 Metabolic pathways; ko05016 Huntington's disease; ko04932 Non-alcoholic fatty liver disease (NAFLD); ko05012 Parkinson's disease;	IPR009081;	Phosphopantetheine binding ACP domain;
CL11096Contig1_orf1	vitelline membrane outer layer 1-like protein	26.682	0.95076	0.955037	0.726875	0.734655	1.13678	1.07908	0.736356	0.712373	0.998989	1.08694	1.44082	1.44255	mitochondria
CL11099Contig1_orf1	lethal 35Di	20.871	1.22941	1.10909	1.15975	1.20104	0.877603	0.99685	0.907216	0.806411	0.841771	0.820158	0.933148	0.927066	cytosol				K03962	NDUFB6; NADH dehydrogenase (ubiquinone) 1 beta subcomplex subunit 6	ko05010 Alzheimer's disease; ko00190 Oxidative phosphorylation; ko01100 Metabolic pathways; ko05016 Huntington's disease; ko04932 Non-alcoholic fatty liver disease (NAFLD); ko05012 Parkinson's disease;
CL11101Contig1_orf1	activating signal cointegrator 1 complex subunit 1	41.248	0.963792		0.959667		0.847853		1.26463		1.01983		1.05573		mitochondria			organic cyclic compound binding; heterocyclic compound binding; RNA binding; binding; nucleic acid binding;	K18666			IPR004087; IPR004088; IPR009097; IPR019510;	K Homology domain; K Homology domain, type 1; RNA ligase/cyclic nucleotide phosphodiesterase; Protein kinase A anchor protein, nuclear localisation signal domain;
CL11103Contig1_orf1	unkown protein	10.113	1.19966	1.1734	1.05108	1.09566	1.04791	1.05038	0.906725	0.928698	0.858344	0.832877	0.796501	0.794976	mitochondria			ion transmembrane transporter activity; substrate-specific transporter activity; monovalent inorganic cation transmembrane transporter activity; oxidoreductase activity, acting on a heme group of donors, oxygen as acceptor; oxidoreductase activity, acting on a heme group of donors; hydrogen ion transmembrane transporter activity; heme-copper terminal oxidase activity; oxidoreductase activity; sub…	K02272	COX7C; cytochrome c oxidase subunit 7c	ko04260 Cardiac muscle contraction; ko05010 Alzheimer's disease; ko00190 Oxidative phosphorylation; ko01100 Metabolic pathways; ko05016 Huntington's disease; ko04932 Non-alcoholic fatty liver disease (NAFLD); ko05012 Parkinson's disease;
CL11137Contig1_orf1	hypothetical protein DAPPUDRAFT_305305	10.714	0.804381	0.789799	1.55405	1.55761	1.23291	1.20965	0.538454	0.579675	0.55535	0.566238	0.788911	0.767652	mitochondria	nucleoside metabolic process; purine nucleoside metabolic process; purine ribonucleoside monophosphate metabolic process; nucleotide metabolic process; single-organism process; purine ribonucleoside biosynthetic process; nucleoside biosynthetic process; biosynthetic process; ribonucleoside monophosphate biosynthetic process; cellular metabolic process; phosphate-containing compound metabolic proc…	intracellular organelle; membrane; mitochondrial part; organelle membrane; organelle envelope; intracellular organelle part; cytoplasm; macromolecular complex; intracellular part; mitochondrial proton-transporting ATP synthase complex, coupling factor F(o); cell; mitochondrial membrane part; proton-transporting ATP synthase complex; mitochondrion; organelle part; intracellular membrane-bounded or…	ion transmembrane transporter activity; substrate-specific transporter activity; monovalent inorganic cation transmembrane transporter activity; inorganic cation transmembrane transporter activity; hydrogen ion transmembrane transporter activity; cation transmembrane transporter activity; substrate-specific transmembrane transporter activity; transporter activity; transmembrane transporter activi…	K02129	ATPeF0E; F-type H+-transporting ATPase subunit e	ko00190 Oxidative phosphorylation; ko01100 Metabolic pathways;
CL1113Contig2_orf1	AAEL005023-PA	49.595													plasma membrane			cation binding; metal ion binding; zinc ion binding; transition metal ion binding; binding; ion binding;	K18932			IPR001594;	Zinc finger, DHHC-type, palmitoyltransferase;
CL11148Contig1_orf1	retinol dehydrogenase 13-like	42.858	0.984604	0.930481	0.880937	0.866685	1.04841	1.08527	0.976678	0.913217	1.10399	1.10081	1.09177	1.15946	plasma membrane				K11153	RDH12; retinol dehydrogenase 12 [EC:1.1.1.300]	ko00830 Retinol metabolism; ko01100 Metabolic pathways;	IPR016040;	NAD(P)-binding domain;
CL11152Contig1_orf1	phosphotriesterase-related protein	41.366	0.993376	0.962095	1.03374	1.0554	0.841878	0.862338	1.17028	1.18556	1.01079	1.00607	0.992516	1.01799	cytosol	metabolic process; catabolic process;		cation binding; metal ion binding; zinc ion binding; transition metal ion binding; binding; ion binding;	K07048			IPR032466;	Metal-dependent hydrolase;
CL11153Contig1_orf1	ORM1-like protein 3	21.526		0.813395		1.68038		0.933901		0.767406		0.74045		0.721802	plasma membrane		intracellular organelle; membrane; endoplasmic reticulum; nuclear outer membrane-endoplasmic reticulum membrane network; bounding membrane of organelle; organelle membrane; cytoplasm; intracellular organelle part; endomembrane system; intrinsic component of membrane; intracellular part; cell; integral component of membrane; organelle part; organelle; intracellular membrane-bounded organelle; endo…
CL11161Contig1_orf1	Cisd3 protein, partial	15.534		0.996159		1.41503		0.924258		0.704121		0.768622		0.967371	extracellular		intracellular membrane-bounded organelle; organelle; intracellular organelle; cell part; intracellular; intracellular part; membrane-bounded organelle; cell;	2 iron, 2 sulfur cluster binding; binding; iron-sulfur cluster binding; metal cluster binding;				IPR018967;	Iron sulphur-containing domain, CDGSH-type;
CL11162Contig1_orf1	GI22277	49.976	0.649884	0.588598	1.29881	1.33525	1.77808	1.77667	0.473393	0.430107	0.576028	0.538364	0.709013	0.626921	nuclear	organic substance catabolic process; metabolic process; protein catabolic process; macromolecule catabolic process; macromolecule metabolic process; protein metabolic process; primary metabolic process; catabolic process; organic substance metabolic process;	intracellular part; cell; cell part; intracellular; cytoplasm;	ATP binding; nucleoside phosphate binding; nucleoside binding; ion binding; hydrolase activity; nucleotide binding; organic cyclic compound binding; heterocyclic compound binding; ribonucleoside binding; carbohydrate derivative binding; catalytic activity; ribonucleotide binding; binding; purine ribonucleoside binding; purine ribonucleotide binding; anion binding; adenyl ribonucleotide binding; a…	K03062	PSMC1; 26S proteasome regulatory subunit T2	ko05169 Epstein-Barr virus infection; ko03050 Proteasome; ko05203 Viral carcinogenesis;	IPR003593; IPR003959; IPR027417;	AAA+ ATPase domain; ATPase, AAA-type, core; P-loop containing nucleoside triphosphate hydrolase;
CL11166Contig1_orf1	Calcyclin-binding protein	30.705	0.741667	0.658459	1.21306	1.14536	1.29869	1.40653	0.575213	0.481855	0.852873	0.824633	1.02116	1.08827	nuclear				K04507	CACYBP; calcyclin binding protein	ko04310 Wnt signaling pathway;	IPR015120; IPR007052; IPR007699; IPR008978;	Siah interacting protein, N-terminal; CS domain; SGS domain; HSP20-like chaperone;
CL11174Contig1_orf1	Coatomer subunit beta	110.87	1.10848	0.989959	1.11541	1.10995	1.04414	1.12814	0.874637	0.860311	0.909737	0.913091	0.749311	0.766821	plasma membrane	establishment of protein localization; transport; intracellular transport; cellular macromolecule localization; establishment of localization in cell; vesicle-mediated transport; intracellular protein transport; organic substance transport; protein localization; macromolecule localization; cellular protein localization; localization; protein transport; establishment of localization; cellular loca…	membrane; cytoplasmic vesicle; organelle membrane; membrane-bounded vesicle; cytoplasmic membrane-bounded vesicle; COPI-coated vesicle; vesicle; Golgi-associated vesicle membrane; cytoplasm; cytoplasmic vesicle part; macromolecular complex; intracellular part; vesicle coat; COPI-coated vesicle membrane; cell; organelle part; coated vesicle membrane; COPI vesicle coat; intracellular; cell part; me…	structural molecule activity; binding;	K17301			IPR011710; IPR011989; IPR016024; IPR029446; IPR002553;	Coatomer beta subunit, C-terminal; Armadillo-like helical; Armadillo-type fold; Coatomer beta subunit, appendage platform domain; Clathrin/coatomer adaptor, adaptin-like, N-terminal;
CL11178Contig1_orf1	probable galactose-1-phosphate uridylyltransferase	40.355	0.982365	1.1272	1.21637	1.01541	1.00816	1.00636	0.932654	0.850396	0.954203	0.82983	0.799117	0.904551	cytosol	single-organism carbohydrate metabolic process; metabolic process; single-organism metabolic process; monosaccharide metabolic process; single-organism process; primary metabolic process; carbohydrate metabolic process; galactose metabolic process; organic substance metabolic process; hexose metabolic process;		UDP-glucose:hexose-1-phosphate uridylyltransferase activity; transition metal ion binding; nucleotidyltransferase activity; catalytic activity; binding; ion binding; metal ion binding; cation binding; zinc ion binding; uridylyltransferase activity; transferase activity; transferase activity, transferring phosphorus-containing groups;	K00965	galT; UDPglucose--hexose-1-phosphate uridylyltransferase [EC:2.7.7.12]	ko04917 Prolactin signaling pathway; ko00052 Galactose metabolism; ko01100 Metabolic pathways; ko00520 Amino sugar and nucleotide sugar metabolism;	IPR005849; IPR011146; IPR005850;	Galactose-1-phosphate uridyl transferase, N-terminal; HIT-like domain; Galactose-1-phosphate uridyl transferase, C-terminal;
CL11179Contig1_orf1	proteasome subunit alpha type-4 isoform X1	31.124	0.714792	0.650589	1.28108	1.43079	1.29278	1.52655	0.698018	0.459714	0.791177	0.708927	0.833155	0.723092	mitochondria	modification-dependent macromolecule catabolic process; cellular macromolecule catabolic process; proteolysis involved in cellular protein catabolic process; cellular protein catabolic process; modification-dependent protein catabolic process; cellular protein metabolic process; ubiquitin-dependent protein catabolic process; primary metabolic process; cellular metabolic process; organic substance…	proteasome core complex, alpha-subunit complex; proteasome complex; cell part; intracellular; proteasome core complex; macromolecular complex; intracellular part; cell; protein complex;	endopeptidase activity; threonine-type endopeptidase activity; peptidase activity; threonine-type peptidase activity; catalytic activity; peptidase activity, acting on L-amino acid peptides; hydrolase activity;	K02728	PSMA4; 20S proteasome subunit alpha 3 [EC:3.4.25.1]	ko03050 Proteasome;	IPR029055; IPR000426;	Nucleophile aminohydrolases, N-terminal; Proteasome alpha-subunit, N-terminal domain;
CL11181Contig1_orf1	signal peptidase 12kDa subunit, putative	13.271	1.27607	1.24702	1.31595	1.20715	0.943714	0.973376	0.694381	0.674049	0.919427	0.841149	0.68344	0.874456	plasma membrane	peptide metabolic process; signal peptide processing; cellular protein metabolic process; nitrogen compound metabolic process; protein processing; cellular amide metabolic process; primary metabolic process; cellular metabolic process; organic substance metabolic process; metabolic process; cellular macromolecule metabolic process; cellular nitrogen compound metabolic process; macromolecule metab…	intracellular organelle; membrane; endoplasmic reticulum; nuclear outer membrane-endoplasmic reticulum membrane network; bounding membrane of organelle; organelle membrane; cytoplasm; intracellular organelle part; endomembrane system; macromolecular complex; intrinsic component of membrane; intracellular part; transferase complex; cell; integral component of membrane; organelle part; organelle; i…	peptidase activity; hydrolase activity; catalytic activity;	K12946	SPCS1; signal peptidase complex subunit 1 [EC:3.4.-.-]	ko03060 Protein export;
CL11187Contig1_orf1	vitelline membrane outer layer 1-like protein	25.697	0.9846	1.00951	0.68087	0.681669	0.769683	0.657044	1.31894	1.42916	1.26698	1.25305	1.23767	1.35704	extracellular
CL11193Contig1_orf1	iron/zinc purple acid phosphatase-like protein	57.164	1.1341	1.13721	0.789603	0.82778	0.634906	0.635606	1.15813	1.20387	0.991497	1.00167	1.57403	1.50344	cytosol			acid phosphatase activity; phosphoric ester hydrolase activity; catalytic activity; phosphatase activity; binding; hydrolase activity, acting on ester bonds; ion binding; cation binding; metal ion binding; hydrolase activity;				IPR029052; IPR015914; IPR004843; IPR025733; IPR008963;	Metallo-dependent phosphatase-like; Purple acid phosphatase, N-terminal; Calcineurin-like phosphoesterase domain, ApaH type; Iron/zinc purple acid phosphatase-like C-terminal domain; Purple acid phosphatase-like, N-terminal;
CL11201Contig1_orf1	Chymotrypsin BII	16.519	1.08466	1.10944	0.70874	0.734824	0.671751	0.681452	1.87657	1.91257	1.03652	1.06861	1.03499	1.08905	nuclear	proteolysis; metabolic process; macromolecule metabolic process; protein metabolic process; primary metabolic process; organic substance metabolic process;		serine-type endopeptidase activity; endopeptidase activity; peptidase activity; catalytic activity; serine hydrolase activity; serine-type peptidase activity; peptidase activity, acting on L-amino acid peptides; hydrolase activity;				IPR009003; IPR001254;	Peptidase S1, PA clan; Serine proteases, trypsin domain;
CL11203Contig1_orf1	thrombospondin	32.672													extracellular	glucosamine-containing compound metabolic process; metabolic process; chitin metabolic process; carbohydrate derivative metabolic process; nitrogen compound metabolic process; amino sugar metabolic process; macromolecule metabolic process; aminoglycan metabolic process; organonitrogen compound metabolic process; organic substance metabolic process;	extracellular region;	chitin binding; carbohydrate derivative binding; binding;				IPR002557;	Chitin binding domain;
CL11205Contig1_orf1	hypothetical protein DAPPUDRAFT_222251	40.671	0.781886	0.754339	1.44914	1.58517	1.45483	1.3912	0.559408	0.55195	0.603	0.442063	0.634859	0.49842	mitochondria	tricarboxylic acid metabolic process; oxidation-reduction process; small molecule metabolic process; single-organism cellular process; tricarboxylic acid cycle; single-organism process; primary metabolic process; cellular respiration; cellular metabolic process; organic substance metabolic process; citrate metabolic process; metabolic process; generation of precursor metabolites and energy; aerob…		magnesium ion binding; nucleoside phosphate binding; ion binding; isocitrate dehydrogenase activity; nucleotide binding; cofactor binding; oxidoreductase activity; oxidoreductase activity, acting on CH-OH group of donors; heterocyclic compound binding; organic cyclic compound binding; oxidoreductase activity, acting on the CH-OH group of donors, NAD or NADP as acceptor; catalytic activity; NAD bi…	K00030	IDH3; isocitrate dehydrogenase (NAD+) [EC:1.1.1.41]	ko00020 Citrate cycle (TCA cycle); ko01120 Microbial metabolism in diverse environments; ko01130 Biosynthesis of antibiotics; ko01200 Carbon metabolism; ko01110 Biosynthesis of secondary metabolites; ko01230 Biosynthesis of amino acids; ko01100 Metabolic pathways; ko01210 2-Oxocarboxylic acid metabolism;	IPR024084;	Isopropylmalate dehydrogenase-like domain;
CL11211Contig1_orf1	hypothetical protein DAPPUDRAFT_305551	14.679													extracellular				K17782			IPR010625;	CHCH;
CL11216Contig1_orf1	hypothetical protein DAPPUDRAFT_324591	116.68	1.05224	1.18755	0.914769	0.902105	0.781442	0.621184	1.31665	1.32521	1.02279	0.893388	1.07166	1.12736	endoplasmic reticulum	single-organism carbohydrate metabolic process; metabolic process; single-organism metabolic process; monosaccharide metabolic process; single-organism process; mannose metabolic process; primary metabolic process; carbohydrate metabolic process; organic substance metabolic process; hexose metabolic process;		mannosidase activity; transition metal ion binding; catalytic activity; binding; ion binding; alpha-mannosidase activity; hydrolase activity, acting on glycosyl bonds; cation binding; metal ion binding; hydrolase activity, hydrolyzing O-glycosyl compounds; carbohydrate binding; hydrolase activity; zinc ion binding;	K12311	MAN2B1; lysosomal alpha-mannosidase [EC:3.2.1.24]	ko00511 Other glycan degradation; ko04142 Lysosome;	IPR027291; IPR028995; IPR000602; IPR011682; IPR015341; IPR011013; IPR011330; IPR013780;	Glycoside hydrolase 38/57, N-terminal domain; Glycoside hydrolase families 57/38, central domain; Glycoside hydrolase family 38, N-terminal domain; Glycosyl hydrolase family 38, C-terminal; Glycoside hydrolase family 38, central domain; Galactose mutarotase-like domain; Glycoside hydrolase/deacetylase, beta/alpha-barrel; Glycosyl hydrolase, all-beta;
CL11216Contig2_orf1	hypothetical protein DAPPUDRAFT_324591	116.65	0.679594	1.15498	0.928387	0.764316	0.489019	0.339939	2.32003	2.50944	0.943155	0.94485	1.03482	1.02445	endoplasmic reticulum	single-organism carbohydrate metabolic process; metabolic process; single-organism metabolic process; monosaccharide metabolic process; single-organism process; mannose metabolic process; primary metabolic process; carbohydrate metabolic process; organic substance metabolic process; hexose metabolic process;		mannosidase activity; transition metal ion binding; catalytic activity; binding; alpha-mannosidase activity; ion binding; hydrolase activity, acting on glycosyl bonds; cation binding; hydrolase activity, hydrolyzing O-glycosyl compounds; carbohydrate binding; metal ion binding; hydrolase activity; zinc ion binding;	K12311	MAN2B1; lysosomal alpha-mannosidase [EC:3.2.1.24]	ko00511 Other glycan degradation; ko04142 Lysosome;	IPR027291; IPR028995; IPR011682; IPR000602; IPR015341; IPR011013; IPR011330; IPR013780;	Glycoside hydrolase 38/57, N-terminal domain; Glycoside hydrolase families 57/38, central domain; Glycosyl hydrolase family 38, C-terminal; Glycoside hydrolase family 38, N-terminal domain; Glycoside hydrolase family 38, central domain; Galactose mutarotase-like domain; Glycoside hydrolase/deacetylase, beta/alpha-barrel; Glycosyl hydrolase, all-beta;
CL11216Contig3_orf1	hypothetical protein DAPPUDRAFT_324591	118.77	1.5872	1.45496	1.41524	1.46262	0.955602	0.935263	0.615492	0.533296	0.510082	0.57121	0.651163	0.688042	plasma membrane	single-organism carbohydrate metabolic process; metabolic process; single-organism metabolic process; monosaccharide metabolic process; single-organism process; mannose metabolic process; primary metabolic process; carbohydrate metabolic process; organic substance metabolic process; hexose metabolic process;		mannosidase activity; transition metal ion binding; catalytic activity; binding; alpha-mannosidase activity; ion binding; hydrolase activity, acting on glycosyl bonds; cation binding; carbohydrate binding; hydrolase activity, hydrolyzing O-glycosyl compounds; metal ion binding; hydrolase activity; zinc ion binding;	K12311	MAN2B1; lysosomal alpha-mannosidase [EC:3.2.1.24]	ko00511 Other glycan degradation; ko04142 Lysosome;	IPR027291; IPR028995; IPR011682; IPR015341; IPR000602; IPR011013; IPR011330; IPR013780;	Glycoside hydrolase 38/57, N-terminal domain; Glycoside hydrolase families 57/38, central domain; Glycosyl hydrolase family 38, C-terminal; Glycoside hydrolase family 38, central domain; Glycoside hydrolase family 38, N-terminal domain; Galactose mutarotase-like domain; Glycoside hydrolase/deacetylase, beta/alpha-barrel; Glycosyl hydrolase, all-beta;
CL11221Contig1_orf1	small ubiquitin-like modifier-1	15.695	0.874382	0.818157	1.54407	1.68413	1.28463	1.32069	0.688427	0.554598	0.63627	0.626538	0.568026	0.371095	extracellular	protein sumoylation; cellular protein metabolic process; protein modification by small protein conjugation or removal; primary metabolic process; cellular metabolic process; organic substance metabolic process; peptidyl-amino acid modification; peptidyl-lysine modification; metabolic process; protein modification by small protein conjugation; cellular macromolecule metabolic process; cellular pro…		protein binding; binding;	K12160	SUMO; small ubiquitin-related modifier	ko03013 RNA transport;	IPR029071; IPR000626; IPR033950; IPR022617;	Ubiquitin-related domain; Ubiquitin domain; Sumo domain; Rad60/SUMO-like domain;
CL11233Contig1_orf1	putative signal peptidase complex subunit 2	27.749	1.06608	1.12042	1.10897	1.19811	0.907682	1.02167	0.793469	0.803011	0.951758	0.883563	1.05605	0.967287	plasma membrane	peptide metabolic process; signal peptide processing; cellular protein metabolic process; nitrogen compound metabolic process; protein processing; cellular amide metabolic process; primary metabolic process; cellular metabolic process; organic substance metabolic process; metabolic process; cellular macromolecule metabolic process; cellular nitrogen compound metabolic process; macromolecule metab…	intracellular organelle; membrane; endoplasmic reticulum; nuclear outer membrane-endoplasmic reticulum membrane network; bounding membrane of organelle; organelle membrane; cytoplasm; intracellular organelle part; endomembrane system; macromolecular complex; intrinsic component of membrane; intracellular part; transferase complex; cell; integral component of membrane; organelle part; organelle; i…	peptidase activity; hydrolase activity; catalytic activity;	K12947	SPCS2; signal peptidase complex subunit 2 [EC:3.4.-.-]	ko03060 Protein export;
CL1123Contig1_orf1	Golgi resident protein GCP60-like isoform X1	54.897	0.825945	0.950112	0.988332	0.996727	1.02495	1.11416	1.12597	1.07404	1.02798	0.782381	1.02588	1.02776	nuclear	transport; localization; establishment of localization;	intrinsic component of membrane; membrane; integral component of membrane; membrane part;	fatty-acyl-CoA binding; binding; ion binding; anion binding; cofactor binding; sulfur compound binding; coenzyme binding;				IPR000582; IPR009038; IPR014352;	Acyl-CoA-binding protein, ACBP; GOLD domain; FERM/acyl-CoA-binding protein, 3-helical bundle;
CL11258Contig1_orf1	conserved hypothetical protein	37.801	1.03421	1.04278	0.898652	1.32644	0.791109	1.10838	1.19911	0.80256	1.09405	0.780533	1.1384	0.651449	extracellular	metabolic process; carbohydrate metabolic process; primary metabolic process; organic substance metabolic process;		carbohydrate binding; isomerase activity; catalytic activity; binding;	K01792	E5.1.3.15; glucose-6-phosphate 1-epimerase [EC:5.1.3.15]	ko01120 Microbial metabolism in diverse environments; ko01130 Biosynthesis of antibiotics; ko00010 Glycolysis / Gluconeogenesis; ko01110 Biosynthesis of secondary metabolites; ko01100 Metabolic pathways;	IPR011013; IPR014718;	Galactose mutarotase-like domain; Glycoside hydrolase-type carbohydrate-binding;
CL11260Contig1_orf1	AGAP004329-PA	13.175	0.821745		1.46723		1.43761		0.658019		0.517576		0.656517		mitochondria
CL11261Contig1_orf1	60S ribosomal protein L5, putative	36.482	1.01086	1.0451	1.03377	1.01876	1.03712	1.17772	0.928269	0.889841	0.86704	0.750267	1.04486	0.970052	mitochondria	cellular protein metabolic process; biosynthetic process; primary metabolic process; cellular metabolic process; organic substance biosynthetic process; cellular biosynthetic process; organic substance metabolic process; metabolic process; cellular macromolecule biosynthetic process; cellular macromolecule metabolic process; gene expression; macromolecule metabolic process; protein metabolic proc…	ribosome; organelle; intracellular organelle; intracellular non-membrane-bounded organelle; cell part; intracellular; cytoplasm; macromolecular complex; intracellular part; cell; ribonucleoprotein complex; cytoplasmic part; non-membrane-bounded organelle;	organic cyclic compound binding; heterocyclic compound binding; RNA binding; 5S rRNA binding; binding; nucleic acid binding; structural constituent of ribosome; structural molecule activity; rRNA binding;	K02932	RP-L5e; large subunit ribosomal protein L5e	ko03010 Ribosome;	IPR025607;	Ribosomal protein L5 eukaryotic/L18 archaeal, C-terminal;
CL11263Contig1_orf1	NADH dehydrogenase	11.529		1.30954		1.19907		1.08626		0.637427		0.699425		0.801718	mitochondria	metabolic process; generation of precursor metabolites and energy; single-organism metabolic process; oxidation-reduction process; single-organism cellular process; electron transport chain; single-organism process; cellular metabolic process; cellular process;	membrane; organelle membrane; cytoplasm; respiratory chain complex I; macromolecular complex; intracellular part; mitochondrial respiratory chain complex I; mitochondrial membrane part; cell; organelle part; mitochondrial envelope; catalytic complex; intracellular; cell part; membrane part; organelle inner membrane; membrane-bounded organelle; mitochondrial inner membrane; intracellular organelle…		K03959	NDUFB3; NADH dehydrogenase (ubiquinone) 1 beta subcomplex subunit 3	ko05010 Alzheimer's disease; ko00190 Oxidative phosphorylation; ko01100 Metabolic pathways; ko05016 Huntington's disease; ko04932 Non-alcoholic fatty liver disease (NAFLD); ko05012 Parkinson's disease;
CL11264Contig1_orf1	eukaryotic translation initiation factor 3 subunit 12	26.134	1.11384	1.03307	1.17226	1.10726	1.24142	1.14541	0.655985	0.731579	0.794018	0.886835	0.792493	0.719693	cytosol	regulation of cellular process; regulation of gene expression; regulation of cellular biosynthetic process; regulation of primary metabolic process; regulation of macromolecule metabolic process; posttranscriptional regulation of gene expression; regulation of macromolecule biosynthetic process; regulation of cellular metabolic process; regulation of biological process; regulation of cellular pro…	cell part; intracellular; cytoplasm; macromolecular complex; intracellular part; protein complex; cell; cytoplasmic part; eukaryotic translation initiation factor 3 complex;	organic cyclic compound binding; heterocyclic compound binding; ribosome binding; RNA binding; translation factor activity, nucleic acid binding; binding; nucleic acid binding; macromolecular complex binding; translation initiation factor activity; ribonucleoprotein complex binding;	K15028			IPR011991; IPR016020; IPR033464; IPR016024;	Winged helix-turn-helix DNA-binding domain; Translation initiation factor 3, subunit 12, N-terminal, eukaryotic; CSN8/PSMD8/EIF3K; Armadillo-type fold;
CL11270Contig1_orf1	hydroxyacid-oxoacid transhydrogenase, mitochondrial	51.028	1.06515	1.05079	1.50965	1.37547	1.39191	1.26626	0.403996	0.461184	0.610115	0.628511	0.544065	0.57185	cytosol	single-organism process; metabolic process; oxidation-reduction process; single-organism metabolic process;		metal ion binding; cation binding; catalytic activity; binding; oxidoreductase activity; ion binding;	K11173			IPR001670;	Alcohol dehydrogenase, iron-type;
CL11275Contig1_orf1	hypothetical protein L798_14186, partial	20.258													cytosol, nuclear	cellular component organization; cellular process; organelle organization; mitochondrion organization; cellular component organization or biogenesis;	membrane; organelle membrane; cytoplasm; integral component of mitochondrial inner membrane; intrinsic component of membrane; intracellular part; mitochondrial membrane part; cell; intrinsic component of mitochondrial inner membrane; organelle part; mitochondrial envelope; integral component of organelle membrane; cell part; membrane part; intracellular; organelle inner membrane; membrane-bounded…
CL11279Contig1_orf1	regucalcin	36.899	0.944247	0.888849	1.05053	1.18026	0.8018	0.791776	1.23564	1.28804	1.00729	1.0449	0.918031	0.866192	mitochondria			enzyme regulator activity; binding; ion binding; metal ion binding; cation binding; calcium ion binding; molecular function regulator;	K01053	E3.1.1.17; gluconolactonase [EC:3.1.1.17]	ko00930 Caprolactam degradation; ko00030 Pentose phosphate pathway; ko01130 Biosynthesis of antibiotics; ko01110 Biosynthesis of secondary metabolites; ko01100 Metabolic pathways; ko00053 Ascorbate and aldarate metabolism; ko01120 Microbial metabolism in diverse environments; ko01200 Carbon metabolism; ko01220 Degradation of aromatic compounds;	IPR013658; IPR011042;	SMP-30/Gluconolactonase/LRE-like region; Six-bladed beta-propeller, TolB-like;
CL11286Contig1_orf1	hypothetical protein DAPPUDRAFT_230075	24.079	0.956305	0.982001	0.834277	0.75152	0.700748	0.755682	1.11388	1.13542	1.36996	1.33058	1.2893	1.21939	cytosol			pigment binding; binding;	K03098			IPR000566; IPR012674; IPR011038;	Lipocalin/cytosolic fatty-acid binding domain; Calycin; Calycin-like;
CL11289Contig1_orf1	tropinone reductase 2-like	28.789	0.772827	0.91164	2.65288	1.72089	0.569189	0.789931	0.501977	0.712122	0.55672	0.706636	0.371575	0.757119	mitochondria			catalytic activity; oxidoreductase activity;				IPR016040;	NAD(P)-binding domain;
CL11297Contig1_orf1	receptor for activated protein kinase c1	35.745	0.94005	0.912902	1.44112	1.41243	1.24303	1.208	0.515148	0.564994	0.701934	0.709818	0.678423	0.674576	cytosol			protein binding; binding;	K14753	RACK1; guanine nucleotide-binding protein subunit beta-2-like 1 protein	ko05162 Measles;	IPR017986; IPR015943;	WD40-repeat-containing domain; WD40/YVTN repeat-like-containing domain;
CL11299Contig1_orf1	L-xylulose reductase-like isoform X1	27.789	0.808212	0.894179	1.50272	1.28649	0.962702	0.877291	0.907525	1.06812	0.800239	0.86151	0.801995	0.956076	mitochondria			catalytic activity; oxidoreductase activity;	K03331	DCXR; L-xylulose reductase [EC:1.1.1.10]	ko01100 Metabolic pathways; ko00040 Pentose and glucuronate interconversions;	IPR016040;	NAD(P)-binding domain;
CL11309Contig1_orf1	probable UDP-glucose 4-epimerase isoform X2	38.961	0.70076	0.885564	1.4264	1.178	1.93647	1.22507	0.292188	0.483449	0.644622	0.682642	0.345858	0.60691	mitochondria	single-organism carbohydrate metabolic process; metabolic process; single-organism metabolic process; monosaccharide metabolic process; single-organism process; primary metabolic process; carbohydrate metabolic process; galactose metabolic process; organic substance metabolic process; hexose metabolic process;		isomerase activity; catalytic activity; racemase and epimerase activity; racemase and epimerase activity, acting on carbohydrates and derivatives; UDP-glucose 4-epimerase activity;	K01784	galE; UDP-glucose 4-epimerase [EC:5.1.3.2]	ko00052 Galactose metabolism; ko01100 Metabolic pathways; ko00520 Amino sugar and nucleotide sugar metabolism;	IPR016040;	NAD(P)-binding domain;
CL1130Contig3_orf1	Na(+)/H(+) exchange regulatory cofactor NHE-RF2, partial	30.824													nuclear			protein binding; binding;	K13358	SLC9A3R2; Na(+)/H(+) exchange regulatory cofactor NHE-RF2	ko04960 Aldosterone-regulated sodium reabsorption;	IPR001478;	PDZ domain;
CL11315Contig1_orf1	tail muscle elongation factor 1 gamma	50.066	0.885213	0.890201	1.12766	1.14509	1.00792	1.13595	0.702787	0.666146	0.95022	0.978177	0.835355	0.801678	mitochondria	translational elongation; cellular protein metabolic process; biosynthetic process; primary metabolic process; cellular metabolic process; organic substance biosynthetic process; cellular biosynthetic process; organic substance metabolic process; metabolic process; cellular macromolecule biosynthetic process; cellular macromolecule metabolic process; gene expression; macromolecule metabolic proce…		organic cyclic compound binding; heterocyclic compound binding; RNA binding; translation factor activity, nucleic acid binding; protein binding; translation elongation factor activity; binding; nucleic acid binding;	K03233	EEF1G; elongation factor 1-gamma	ko05134 Legionellosis;	IPR010987; IPR004046; IPR001662; IPR004045; IPR012336;	Glutathione S-transferase, C-terminal-like; Glutathione S-transferase, C-terminal; Translation elongation factor EF1B, gamma chain, conserved; Glutathione S-transferase, N-terminal; Thioredoxin-like fold;
CL11318Contig1_orf1	vitelline membrane outer layer 1-like protein	23.477	1.07811	1.11965	0.695865	0.764749	0.62872	0.702971	1.53694	1.44788	1.22573	1.18468	1.13422	1.178	extracellular
CL11323Contig1_orf1	hypothetical protein DAPPUDRAFT_99667	30.488	0.771291	0.993878	0.974659	0.931623	0.970117	1.03637	0.84796	1.0405	1.37048	1.43929	1.10763	0.926404	extracellular	proteolysis involved in cellular protein catabolic process; cellular macromolecule catabolic process; cellular protein catabolic process; cellular protein metabolic process; primary metabolic process; cellular metabolic process; organic substance metabolic process; organic substance catabolic process; metabolic process; protein catabolic process; macromolecule catabolic process; cellular macromol…	proteasome complex; cell part; intracellular; proteasome core complex; macromolecular complex; intracellular part; protein complex; cell;	endopeptidase activity; threonine-type endopeptidase activity; peptidase activity; threonine-type peptidase activity; catalytic activity; peptidase activity, acting on L-amino acid peptides; hydrolase activity;	K02736	PSMB4; 20S proteasome subunit beta 7 [EC:3.4.25.1]	ko03050 Proteasome;	IPR029055;	Nucleophile aminohydrolases, N-terminal;
CL11350Contig1_orf1	translocon-associated protein, gamma subunit, putative	25.957	0.701637	0.765883	1.46324	1.33589	1.60871	1.40049	0.368109	0.637493	0.430093	0.534887	0.508025	0.655711	plasma membrane	intracellular transport; cellular component organization; establishment of protein localization to organelle; single-organism process; cotranslational protein targeting to membrane; protein transport; establishment of localization; protein targeting; protein targeting to membrane; establishment of localization in cell; single-organism localization; protein localization to endoplasmic reticulum; i…	intrinsic component of membrane; membrane; integral component of membrane; membrane part;		K13251	SSR3; translocon-associated protein subunit gamma	ko04141 Protein processing in endoplasmic reticulum;
CL11351Contig1_orf1	proteasome subunit beta type-3-like	25.355	0.978974	0.924812	1.0166	1.02492	1.25468	1.28508	0.797286	0.726989	0.979642	0.988622	0.93644	0.853659	extracellular	modification-dependent macromolecule catabolic process; proteolysis involved in cellular protein catabolic process; cellular macromolecule catabolic process; cellular protein catabolic process; modification-dependent protein catabolic process; cellular protein metabolic process; ubiquitin-dependent protein catabolic process; primary metabolic process; cellular metabolic process; proteasomal prote…	proteasome complex; cell part; intracellular; proteasome core complex; macromolecular complex; intracellular part; protein complex; cell; proteasome core complex, beta-subunit complex;	endopeptidase activity; threonine-type endopeptidase activity; peptidase activity; threonine-type peptidase activity; catalytic activity; peptidase activity, acting on L-amino acid peptides; hydrolase activity;	K02735	PSMB3; 20S proteasome subunit beta 3 [EC:3.4.25.1]	ko03050 Proteasome;	IPR029055;	Nucleophile aminohydrolases, N-terminal;
CL11354Contig1_orf1	glutathione S-transferase	26.576	0.736155	0.80741	1.23387	1.26093	0.950607	0.923275	0.744978	0.810868	1.43706	1.36964	0.795419	0.787238	cytosol	metabolic process;		glutathione transferase activity; transferase activity, transferring alkyl or aryl (other than methyl) groups; protein binding; catalytic activity; transferase activity; binding;				IPR004046; IPR010987; IPR004045; IPR012336;	Glutathione S-transferase, C-terminal; Glutathione S-transferase, C-terminal-like; Glutathione S-transferase, N-terminal; Thioredoxin-like fold;
CL11355Contig1_orf1	predicted protein	25.304	0.827369		0.9851		1.4986		0.958189		0.804304		0.720034		cytosol							IPR018997;	PUB domain;
CL11356Contig1_orf1	alkyldihydroxyacetonephosphate synthase, peroxisomal-like	74.488	1.17278	1.22462	0.965074	0.99005	1.0855	1.08292	1.13619	1.00186	0.857697	0.859055	0.726845	0.828805	mitochondria	single-organism process; metabolic process; oxidation-reduction process; single-organism metabolic process;		organic cyclic compound binding; heterocyclic compound binding; oxidoreductase activity, acting on CH-OH group of donors; nucleoside phosphate binding; flavin adenine dinucleotide binding; catalytic activity; binding; ion binding; anion binding; nucleotide binding; cofactor binding; small molecule binding; coenzyme binding; oxidoreductase activity;	K00803	AGPS; alkyldihydroxyacetonephosphate synthase [EC:2.5.1.26]	ko04146 Peroxisome; ko00565 Ether lipid metabolism; ko01100 Metabolic pathways;	IPR016166; IPR016171; IPR004113; IPR016169; IPR016164; IPR016167; IPR006094;	FAD-binding, type 2; Vanillyl-alcohol oxidase, C-terminal subdomain 2; FAD-linked oxidase, C-terminal; CO dehydrogenase flavoprotein-like, FAD-binding, subdomain 2; FAD-linked oxidase-like, C-terminal; FAD-binding, type 2, subdomain 1; FAD linked oxidase, N-terminal;
CL1135Contig1_orf1	PI-PLC X domain-containing protein 1	93.982	0.868284	1.01014	0.607609	0.682009	0.70603	0.717486	1.50581	1.40079	1.32133	1.18467	1.3641	1.13434	plasma membrane	single-organism process; metabolic process; primary metabolic process; single-organism metabolic process; lipid metabolic process; organic substance metabolic process;		phosphoric diester hydrolase activity; hydrolase activity; catalytic activity; phosphoric ester hydrolase activity; hydrolase activity, acting on ester bonds;				IPR000909; IPR017946;	Phosphatidylinositol-specific phospholipase C, X domain; PLC-like phosphodiesterase, TIM beta/alpha-barrel domain;
CL11364Contig1_orf1	hypothetical protein YQE_07146, partial	40.647	0.880491	0.91988	1.38307	1.27756	1.37128	1.13301	0.708917	0.762196	0.620411	0.77121	0.667293	0.812299	mitochondria		cell part; intracellular; cytoplasm; macromolecular complex; intracellular part; protein complex; cell; cytoplasmic part; eukaryotic translation initiation factor 3 complex;	organic cyclic compound binding; heterocyclic compound binding; RNA binding; translation factor activity, nucleic acid binding; binding; nucleic acid binding; translation initiation factor activity; protein binding;	K03247	EIF3H; translation initiation factor 3 subunit H	ko05162 Measles; ko03013 RNA transport;	IPR000555;	JAB1/MPN/MOV34 metalloenzyme domain;
CL11369Contig1_orf1	prohibitin 2	35.144	1.03846	0.904368	1.41355	1.51234	1.29461	1.67348	0.620612	0.38091	0.4941	0.328069	0.649213	0.406546	mitochondria		membrane;		K17081			IPR001107;	Band 7 domain;
CL11376Contig1_orf1	D-beta-hydroxybutyrate dehydrogenase, mitochondrial-like isoform X1	40.41	0.575801	0.575777	0.811367	0.873807	0.878854	0.878881	0.839316	0.720258	1.33985	1.22958	1.779	1.88238	extracellular			catalytic activity; oxidoreductase activity;				IPR016040;	NAD(P)-binding domain;
CL11380Contig1_orf1	hypothetical protein DAPPUDRAFT_303852	30.904	0.726851	0.508871	0.796556	0.577491	0.804355	0.75391	0.844706	0.567777	2.13394	3.1405	0.930712	0.874603	cytosol	proteolysis involved in cellular protein catabolic process; cellular macromolecule catabolic process; cellular protein catabolic process; cellular protein metabolic process; primary metabolic process; cellular metabolic process; organic substance metabolic process; organic substance catabolic process; metabolic process; protein catabolic process; macromolecule catabolic process; cellular macromol…	proteasome complex; cell part; intracellular; proteasome core complex; macromolecular complex; intracellular part; protein complex; cell;	endopeptidase activity; threonine-type endopeptidase activity; peptidase activity; threonine-type peptidase activity; catalytic activity; peptidase activity, acting on L-amino acid peptides; hydrolase activity;	K02737	PSMB5; 20S proteasome subunit beta 5 [EC:3.4.25.1]	ko03050 Proteasome;	IPR029055;	Nucleophile aminohydrolases, N-terminal;
CL11382Contig1_orf1	tsunagi/Y14	19.413		0.686242		1.01586		1.4308		0.907868		0.701257		1.00671	cytosol, nuclear	RNA processing; cellular aromatic compound metabolic process; organic cyclic compound metabolic process; nitrogen compound metabolic process; primary metabolic process; cellular metabolic process; organic substance metabolic process; RNA metabolic process; metabolic process; nucleic acid metabolic process; heterocycle metabolic process; nucleobase-containing compound metabolic process; cellular m…	organelle; intracellular membrane-bounded organelle; intracellular organelle; nucleus; cell part; intracellular; cytoplasm; intracellular part; membrane-bounded organelle; cell;	organic cyclic compound binding; heterocyclic compound binding; mRNA binding; RNA binding; poly(A) RNA binding; nucleoside phosphate binding; binding; nucleic acid binding; nucleotide binding; small molecule binding;	K12876	RBM8A; RNA-binding protein 8A	ko03040 Spliceosome; ko03015 mRNA surveillance pathway; ko03013 RNA transport;	IPR033744; IPR000504; IPR012677;	RBM8, RNA recognition motif; RNA recognition motif domain; Nucleotide-binding alpha-beta plait domain;
CL11383Contig1_orf1	26S proteasome non-ATPase regulatory subunit 1, partial	112.62	0.970786	1.00363	1.09126	1.0042	1.3215	1.5654	0.698865	0.630655	0.854392	0.818676	0.710148	0.667022	cytosol	regulation of cellular process; single organism signaling; cellular response to stimulus; regulation of primary metabolic process; regulation of macromolecule metabolic process; regulation of catabolic process; single-organism cellular process; single-organism process; signaling; response to stimulus; signal transduction; regulation of biological process; cell communication; regulation of protein…	proteasome complex; cell part; intracellular; macromolecular complex; intracellular part; protein complex; cell;	3',5'-cyclic-nucleotide phosphodiesterase activity; cyclic-nucleotide phosphodiesterase activity; enzyme regulator activity; catalytic activity; phosphoric ester hydrolase activity; binding; hydrolase activity, acting on ester bonds; phosphoric diester hydrolase activity; hydrolase activity; molecular function regulator;	K03032	PSMD1; 26S proteasome regulatory subunit N2	ko05169 Epstein-Barr virus infection; ko03050 Proteasome;	IPR002073; IPR011989; IPR016024;	3'5'-cyclic nucleotide phosphodiesterase, catalytic domain; Armadillo-like helical; Armadillo-type fold;
CL11391Contig1_orf1	hypothetical protein DAPPUDRAFT_305570	79.689	1.04992	1.08234	0.902725	0.895871	1.05118	0.987032	1.05697	1.09858	0.872959	0.925979	1.03531	1.04817	plasma membrane				K15377	SLC44A2_4_5; solute carrier family 44 (choline transporter-like protein), member 2/4/5	ko05231 Choline metabolism in cancer;
CL11397Contig1_orf1	ribosomal protein P0	35.518	0.836622	0.813285	1.17901	1.17319	1.26832	1.24935	0.756025	0.784207	0.776841	0.766123	0.887935	0.872154	cytosol	cellular component biogenesis; ribosome biogenesis; ribonucleoprotein complex biogenesis; cellular component organization or biogenesis;	cell; intracellular; cell part;		K02941	RP-LP0; large subunit ribosomal protein LP0	ko03010 Ribosome;
CL11399Contig1_orf1	NADH:ubiquinone oxidoreductase NDUFV2/24 kDa subunit	27.592	1.01897	0.956919	0.956613	1.01217	0.931014	0.917527	1.02888	0.96621	1.07453	1.15894	1.04405	1.03751	mitochondria	single-organism process; metabolic process; oxidation-reduction process; single-organism metabolic process;		catalytic activity; oxidoreductase activity;	K03943	NDUFV2; NADH dehydrogenase (ubiquinone) flavoprotein 2 [EC:1.6.5.3 1.6.99.3]	ko05010 Alzheimer's disease; ko00190 Oxidative phosphorylation; ko01100 Metabolic pathways; ko05016 Huntington's disease; ko04932 Non-alcoholic fatty liver disease (NAFLD); ko05012 Parkinson's disease;	IPR012336;	Thioredoxin-like fold;
CL1139Contig1_orf1	tetraspanin-like protein CD9	29.132	1.11863	1.04693	0.944401	0.957359	0.949125	0.932419	1.1213	1.05364	0.911649	0.969706	0.984421	1.09743	plasma membrane		intrinsic component of membrane; membrane; integral component of membrane; membrane part;					IPR008952;	Tetraspanin, EC2 domain;
CL11401Contig1_orf1	hypothetical protein DAPPUDRAFT_300448	34.618	1.00665	1.00725	0.881896	0.887599	0.795559	0.779591	1.01599	1.07166	1.2641	1.31983	1.12235	1.1345	cytosol	transport; transmembrane transport; single-organism localization; single-organism cellular process; single-organism process; localization; cellular process; single-organism transport; establishment of localization;			K15100			IPR023395;	Mitochondrial carrier domain;
CL11414Contig1_orf1	Mitochondrial 2-oxodicarboxylate carrier	34.022	0.97505	1.01596	0.805685	0.714449	0.743177	0.760957	1.02112	0.826655	1.17566	1.11678	1.36344	1.78948	cytosol				K15110			IPR023395;	Mitochondrial carrier domain;
CL11417Contig1_orf1	protein RTF2 homolog	34.347													nuclear							IPR027799;	Replication termination factor 2, RING-finger;
CL11421Contig1_orf1	G-protein coupled receptor GRL101, partial	35.767	1.23422	1.23412	0.710056	0.673041	0.661052	0.657785	1.34986	1.42426	1.13887	1.18434	1.1336	1.12025	extracellular							IPR032675;	Leucine-rich repeat domain, L domain-like;
CL11427Contig1_orf1	C-type lectin 1	44.621	1.13628	1.14056	0.695691	0.645843	0.675484	0.717622	1.78229	1.85531	1.10406	1.20436	0.917385	0.853199	extracellular			protein binding; binding;	K08399			IPR001304; IPR016187; IPR032675; IPR016186;	C-type lectin-like; C-type lectin fold; Leucine-rich repeat domain, L domain-like; C-type lectin-like/link domain;
CL1142Contig4_orf1	hypothetical protein DAPPUDRAFT_308250	21.109		0.62135		2.00783		1.30402		0.409053		0.39523		0.477269	mitochondria	protein folding; metabolic process; cellular protein metabolic process; cellular macromolecule metabolic process; macromolecule metabolic process; protein metabolic process; primary metabolic process; cellular process; cellular metabolic process; organic substance metabolic process;	prefoldin complex; macromolecular complex; protein complex;	protein binding; unfolded protein binding; binding;	K09549
CL11448Contig1_orf1	hypothetical protein DAPPUDRAFT_305421	19.946	1.03937	1.04464	0.97332	1.08588	1.2199	1.23409	0.899243	0.884774	0.859886	0.794029	0.803246	0.730588	mitochondria	regulation of actin filament polymerization; regulation of cellular process; cellular component organization; Arp2/3 complex-mediated actin nucleation; regulation of biological quality; positive regulation of protein polymerization; regulation of actin cytoskeleton organization; actin filament organization; single-organism process; regulation of cellular component biogenesis; regulation of actin …	intracellular organelle; intracellular non-membrane-bounded organelle; cytoskeletal part; intracellular organelle part; macromolecular complex; intracellular part; cell; actin cytoskeleton; organelle part; non-membrane-bounded organelle; organelle; cytoskeleton; Arp2/3 protein complex; cell part; intracellular; protein complex;		K05754	ARPC5; actin related protein 2/3 complex, subunit 5	ko05100 Bacterial invasion of epithelial cells; ko05132 Salmonella infection; ko04810 Regulation of actin cytoskeleton; ko05131 Shigellosis; ko05130 Pathogenic Escherichia coli infection; ko04666 Fc gamma R-mediated phagocytosis; ko04144 Endocytosis;
CL11450Contig1_orf1	adenine phosphoribosyltransferase-like	22.093													cytosol, nuclear	pigment biosynthetic process; adenine metabolic process; nucleoside metabolic process; cellular aromatic compound metabolic process; single-organism process; biosynthetic process; organonitrogen compound biosynthetic process; adenine biosynthetic process; cellular metabolic process; purine nucleobase salvage; organic substance metabolic process; metabolic process; heterocycle metabolic process; a…	intracellular part; cell; cell part; intracellular; cytoplasm;	adenine phosphoribosyltransferase activity; transferase activity, transferring pentosyl groups; transferase activity, transferring glycosyl groups; catalytic activity; transferase activity;	K00759	APRT; adenine phosphoribosyltransferase [EC:2.4.2.7]	ko00230 Purine metabolism; ko01100 Metabolic pathways;	IPR000836; IPR029057;	Phosphoribosyltransferase domain; Phosphoribosyltransferase-like;
CL11456Contig1_orf1CTRB1_LITVA	RecName: Full=Chymotrypsin BI	26.484	1.52652	1.49023	0.589544	0.610307	0.641994	0.62975	1.1818	1.13273	0.986669	1.04772	1.42241	1.42119	extracellular	proteolysis; metabolic process; macromolecule metabolic process; protein metabolic process; primary metabolic process; organic substance metabolic process;		serine-type endopeptidase activity; endopeptidase activity; peptidase activity; catalytic activity; serine hydrolase activity; serine-type peptidase activity; peptidase activity, acting on L-amino acid peptides; hydrolase activity;				IPR009003; IPR001254;	Peptidase S1, PA clan; Serine proteases, trypsin domain;
CL11457Contig1_orf1	Na+/K+-ATPase alpha subunit	113.09	1.11247	1.06891	1.15659	1.09812	1.05046	1.0321	0.800363	0.930181	0.755653	0.75361	0.90812	0.96838	plasma membrane	transport; potassium ion transport; single-organism localization; cation transport; ion transport; metal ion transport; single-organism process; localization; monovalent inorganic cation transport; sodium ion transport; single-organism transport; establishment of localization;	intrinsic component of membrane; membrane; integral component of membrane; membrane part;	ATPase activity, coupled to transmembrane movement of ions; nucleoside phosphate binding; potassium-transporting ATPase activity; primary active transmembrane transporter activity; sodium:potassium-exchanging ATPase activity; substrate-specific transporter activity; hydrolase activity, acting on acid anhydrides; monovalent inorganic cation transmembrane transporter activity; hydrolase activity; s…	K01539	ATP1A; sodium/potassium-transporting ATPase subunit alpha [EC:3.6.3.9]	ko04976 Bile secretion; ko04261 Adrenergic signaling in cardiomyocytes; ko04970 Salivary secretion; ko04971 Gastric acid secretion; ko04961 Endocrine and other factor-regulated calcium reabsorption; ko04960 Aldosterone-regulated sodium reabsorption; ko04978 Mineral absorption; ko04973 Carbohydrate digestion and absorption; ko04918 Thyroid hormone synthesis; ko04972 Pancreatic secretion; ko04024 c…	IPR004014; IPR023298; IPR023299; IPR008250; IPR023214; IPR006068;	Cation-transporting P-type ATPase, N-terminal; P-type ATPase, transmembrane domain; P-type ATPase, cytoplasmic domain N; P-type ATPase, A domain; HAD-like domain; Cation-transporting P-type ATPase, C-terminal;
CL11464Contig1_orf1	hypothetical protein DAPPUDRAFT_299942	28.951													plasma membrane	biosynthetic process; metabolic process;		organic cyclic compound binding; heterocyclic compound binding; catalytic activity; binding; ion binding; anion binding; cofactor binding; pyridoxal phosphate binding;				IPR015424; IPR004839; IPR015421;	Pyridoxal phosphate-dependent transferase; Aminotransferase, class I/classII; Pyridoxal phosphate-dependent transferase, major region, subdomain 1;
CL11471Contig1_orf1	mitochondrial cytochrome c oxidase subunit IV	21.423	1.37572	1.24454	1.14635	1.0731	0.931231	0.881632	0.853796	0.954164	0.781546	0.807394	0.777057	0.889951	mitochondria			ion transmembrane transporter activity; substrate-specific transporter activity; monovalent inorganic cation transmembrane transporter activity; oxidoreductase activity, acting on a heme group of donors, oxygen as acceptor; oxidoreductase activity, acting on a heme group of donors; hydrogen ion transmembrane transporter activity; heme-copper terminal oxidase activity; oxidoreductase activity; sub…	K02263	COX4; cytochrome c oxidase subunit 4	ko04260 Cardiac muscle contraction; ko05010 Alzheimer's disease; ko00190 Oxidative phosphorylation; ko01100 Metabolic pathways; ko05016 Huntington's disease; ko04932 Non-alcoholic fatty liver disease (NAFLD); ko05012 Parkinson's disease;
CL11473Contig1_orf1	Coiled-coil domain-containing protein 58	19.706	0.92786		1.15407		0.983233		0.985794		0.894714		0.989671		extracellular
CL11477Contig1_orf1	probable cytosolic iron-sulfur protein assembly protein CIAO1	37.833	1.14968	1.02209	1.07307	1.23896	1.22349	1.12182	0.565315	0.615984	0.840091	0.825404	0.960569	0.906778	nuclear	cellular component biogenesis; iron-sulfur cluster assembly; cellular component organization; biosynthetic process; metabolic process; metallo-sulfur cluster assembly; cellular component assembly; cellular component organization or biogenesis;	cell part; intracellular; cytoplasm; macromolecular complex; intracellular part; cytosolic part; protein complex; cytosol; cell; cytoplasmic part; CIA complex;	protein binding; binding;				IPR017986; IPR015943;	WD40-repeat-containing domain; WD40/YVTN repeat-like-containing domain;
CL11482Contig1_orf1	zinc metalloproteinase nas-4-like	29.348	0.999145	1.01181	0.760467	0.744289	0.802298	0.805731	1.07723	1.14763	1.12349	1.13679	1.40261	1.40853	extracellular	proteolysis; metabolic process; macromolecule metabolic process; protein metabolic process; primary metabolic process; organic substance metabolic process;		endopeptidase activity; metalloendopeptidase activity; peptidase activity; transition metal ion binding; catalytic activity; binding; ion binding; cation binding; metal ion binding; peptidase activity, acting on L-amino acid peptides; hydrolase activity; metallopeptidase activity; zinc ion binding;				IPR001506; IPR024079; IPR034035; IPR006026;	Peptidase M12A; Metallopeptidase, catalytic domain; Astacin-like metallopeptidase domain; Peptidase, metallopeptidase;
CL11486Contig1_orf1	peroxiredoxin-2-like	26.072	0.763909	0.722249	1.5254	1.39537	1.09708	0.960592	0.761639	0.863619	1.01387	0.990293	0.700353	0.820412	mitochondria	regulation of cellular process; homeostatic process; regulation of biological quality; metabolic process; regulation of biological process; oxidation-reduction process; single-organism metabolic process; cell redox homeostasis; single-organism cellular process; cellular homeostasis; single-organism process; cellular process; biological regulation;		antioxidant activity; catalytic activity; peroxiredoxin activity; oxidoreductase activity, acting on peroxide as acceptor; oxidoreductase activity;	K20011			IPR019479; IPR000866; IPR013766; IPR012336;	Peroxiredoxin, C-terminal; Alkyl hydroperoxide reductase subunit C/ Thiol specific antioxidant; Thioredoxin domain; Thioredoxin-like fold;
CL11495Contig1_orf1	40S ribosomal protein S4	31.578	1.13822	1.04611	0.941931	1.07721	1.15532	1.1525	0.738251	0.721654	0.802713	0.807664	0.861921	0.792042	mitochondria	cellular protein metabolic process; biosynthetic process; primary metabolic process; cellular metabolic process; organic substance biosynthetic process; cellular biosynthetic process; organic substance metabolic process; metabolic process; cellular macromolecule biosynthetic process; cellular macromolecule metabolic process; gene expression; macromolecule metabolic process; protein metabolic proc…	ribosome; organelle; intracellular organelle; intracellular non-membrane-bounded organelle; cell part; intracellular; cytoplasm; macromolecular complex; intracellular part; cell; ribonucleoprotein complex; cytoplasmic part; non-membrane-bounded organelle;	organic cyclic compound binding; heterocyclic compound binding; RNA binding; binding; nucleic acid binding; structural molecule activity; structural constituent of ribosome;	K02987	RP-S4e; small subunit ribosomal protein S4e	ko03010 Ribosome;	IPR013845; IPR032277; IPR002942; IPR013843;	Ribosomal protein S4e, central region; 40S ribosomal protein S4, C-terminal domain; RNA-binding S4 domain; Ribosomal protein S4e, N-terminal;
CL11500Contig1_orf1	casein kinase II subunit beta isoform X1	28.863	0.943054	0.962049	1.25336	1.20314	0.96522	0.982209	0.983735	0.930667	0.913088	0.978627	0.905137	0.837101	cytosol		protein kinase CK2 complex; cell part; intracellular; macromolecular complex; intracellular part; protein complex; cell;	protein kinase regulator activity; kinase regulator activity; enzyme regulator activity; molecular function regulator;	K03115	CSNK2B; casein kinase II subunit beta	ko04712 Circadian rhythm - plant; ko05168 Herpes simplex infection; ko05169 Epstein-Barr virus infection; ko03008 Ribosome biogenesis in eukaryotes; ko04139 Mitophagy - yeast; ko04530 Tight junction; ko05162 Measles; ko04064 NF-kappa B signaling pathway; ko04520 Adherens junction; ko04310 Wnt signaling pathway;	IPR016149; IPR016150;	Casein kinase II, regulatory subunit, alpha-helical; Casein kinase II, regulatory subunit, beta-sheet;
CL11521Contig1_orf1	peritrophin-44-like protein	25.973	1.47047	1.52552	0.565232	0.583857	0.813856	0.839046	1.13732	0.958623	1.28976	1.3566	0.767845	0.850869	mitochondria	glucosamine-containing compound metabolic process; metabolic process; chitin metabolic process; carbohydrate derivative metabolic process; nitrogen compound metabolic process; amino sugar metabolic process; macromolecule metabolic process; aminoglycan metabolic process; organonitrogen compound metabolic process; organic substance metabolic process;	extracellular region;	chitin binding; carbohydrate derivative binding; binding;				IPR002557;	Chitin binding domain;
CL11522Contig1_orf1	fructose 1,6-bisphosphatase	39.916	1.04761	0.981458	1.22111	1.25605	1.00517	0.969288	0.561876	0.721576	1.17161	0.980509	0.855339	0.728928	cytosol, nuclear	monosaccharide catabolic process; single-organism carbohydrate catabolic process; single-organism catabolic process; single-organism process; primary metabolic process; carbohydrate metabolic process; carbohydrate catabolic process; organic substance metabolic process; organic substance catabolic process; single-organism carbohydrate metabolic process; metabolic process; fructose metabolic proces…		carbohydrate phosphatase activity; phosphoric ester hydrolase activity; catalytic activity; phosphatase activity; hydrolase activity, acting on ester bonds; hydrolase activity; sugar-phosphatase activity; fructose 1,6-bisphosphate 1-phosphatase activity;	K03841	FBP; fructose-1,6-bisphosphatase I [EC:3.1.3.11]	ko00051 Fructose and mannose metabolism; ko00030 Pentose phosphate pathway; ko01130 Biosynthesis of antibiotics; ko01110 Biosynthesis of secondary metabolites; ko00710 Carbon fixation in photosynthetic organisms; ko01100 Metabolic pathways; ko00680 Methane metabolism; ko01120 Microbial metabolism in diverse environments; ko01200 Carbon metabolism; ko00010 Glycolysis / Gluconeogenesis; ko04152 AMP…	IPR033391;	Fructose-1-6-bisphosphatase class I, N-terminal;
CL11536Contig1_orf1	3-oxoacyl-[acyl-carrier-protein] reductase	31.406	0.957255	0.950953	1.29763	1.29798	1.12623	1.10447	0.778551	0.675021	0.887078	0.77678	0.897044	0.75178	cytosol			catalytic activity; oxidoreductase activity;				IPR016040;	NAD(P)-binding domain;
CL11538Contig1_orf1	hypothetical protein DAPPUDRAFT_109556	32.508	0.981936	1.00817	0.826711	0.896044	0.815407	0.757525	1.2865	1.42136	1.20601	1.21493	0.993249	0.902659	mitochondria	metabolic process;		transferase activity, transferring one-carbon groups; methyltransferase activity; catalytic activity; transferase activity;				IPR029063; IPR013216;	S-adenosyl-L-methionine-dependent methyltransferase; Methyltransferase type 11;
CL11539Contig1_orf1	hypothetical protein L798_02394	15.27	1.11163	1.20539	1.00051	1.03986	0.786983	0.782904	1.12628	1.27029	0.831152	0.797799	1.22824	1.10856	nuclear		membrane;
CL11553Contig1_orf1	protocadherin Fat 4-like isoform X1	195.87	1.10812	1.07576	0.773914	0.709614	1.17963	1.14844	1.06361	1.02632	0.860037	0.856784	1.03504	1.07507	plasma membrane	cell-cell adhesion; cell adhesion; biological adhesion; homophilic cell adhesion via plasma membrane adhesion molecules; cell-cell adhesion via plasma-membrane adhesion molecules;	membrane; cell; cell part; cell periphery; plasma membrane;	cation binding; metal ion binding; calcium ion binding; binding; ion binding;				IPR015919; IPR002126;	Cadherin-like; Cadherin;
CL11554Contig1_orf1	mitochondrial malate dehydrogenase	39.014	0.792956	0.797099	1.26759	1.2298	1.55571	1.61307	0.615208	0.537775	0.734563	0.717294	0.593804	0.70108	cytosol	dicarboxylic acid metabolic process; oxidation-reduction process; small molecule metabolic process; single-organism cellular process; single-organism process; carbohydrate metabolic process; primary metabolic process; cellular metabolic process; organic substance metabolic process; metabolic process; single-organism metabolic process; malate metabolic process; carboxylic acid metabolic process; o…		oxidoreductase activity, acting on CH-OH group of donors; oxidoreductase activity, acting on the CH-OH group of donors, NAD or NADP as acceptor; malate dehydrogenase activity; catalytic activity; L-malate dehydrogenase activity; oxidoreductase activity;	K00026	MDH2; malate dehydrogenase [EC:1.1.1.37]	ko00270 Cysteine and methionine metabolism; ko01130 Biosynthesis of antibiotics; ko01110 Biosynthesis of secondary metabolites; ko00710 Carbon fixation in photosynthetic organisms; ko01100 Metabolic pathways; ko00020 Citrate cycle (TCA cycle); ko01120 Microbial metabolism in diverse environments; ko01200 Carbon metabolism; ko00620 Pyruvate metabolism; ko00630 Glyoxylate and dicarboxylate metaboli…	IPR022383; IPR016040; IPR001236; IPR015955;	Lactate/malate dehydrogenase, C-terminal; NAD(P)-binding domain; Lactate/malate dehydrogenase, N-terminal; Lactate dehydrogenase/glycoside hydrolase, family 4, C-terminal;
CL11557Contig1_orf1	C-type lectin-like domain-containing protein PtLP	21.18	0.976122	1.01105	0.559133	0.610716	0.847619	0.836226	1.40021	1.43389	0.89877	1.01825	1.5741	1.45081	extracellular							IPR001304; IPR016187; IPR016186;	C-type lectin-like; C-type lectin fold; C-type lectin-like/link domain;
CL11561Contig1_orf1	organic cation transporter protein	64.961	1.04344	1.03209	0.715829	0.667647	1.23234	1.15871	0.820884	0.899604	0.929563	0.950485	1.26109	1.27628	plasma membrane	transport; transmembrane transport; single-organism localization; single-organism cellular process; single-organism process; localization; cellular process; single-organism transport; establishment of localization;	intrinsic component of membrane; membrane; integral component of membrane; membrane part;	transmembrane transporter activity; transporter activity;	K08202	SLC22A4_5; MFS transporter, OCT family, solute carrier family 22 (organic cation transporter), member 4/5	ko05231 Choline metabolism in cancer;	IPR020846;	Major facilitator superfamily domain;
CL11567Contig1_orf1	cytochrome c oxidase subunit 7A2, mitochondrial	14.292	0.970957	1.09394	0.948968	1.02214	0.883788	0.879344	1.07429	1.03425	1.04742	1.02623	1.12183	1.02034	mitochondria		membrane; intracellular organelle; mitochondrial part; organelle membrane; cytoplasm; intracellular organelle part; organelle envelope; intracellular part; cell; mitochondrial membrane part; organelle part; mitochondrion; mitochondrial respiratory chain; organelle; mitochondrial envelope; intracellular membrane-bounded organelle; intracellular; cell part; membrane part; envelope; organelle inner …	ion transmembrane transporter activity; substrate-specific transporter activity; monovalent inorganic cation transmembrane transporter activity; oxidoreductase activity, acting on a heme group of donors, oxygen as acceptor; oxidoreductase activity, acting on a heme group of donors; hydrogen ion transmembrane transporter activity; heme-copper terminal oxidase activity; oxidoreductase activity; sub…
CL11568Contig1_orf1	hypothetical protein DAPPUDRAFT_231053	35.407	0.926557	0.947074	1.61647	1.69637	1.02318	1.09699	0.555535	0.435119	0.785666	0.665111	0.600447	0.481849	cytosol			catalytic activity; oxidoreductase activity;	K00079	CBR1; carbonyl reductase 1 [EC:1.1.1.184 1.1.1.189 1.1.1.197]	ko00980 Metabolism of xenobiotics by cytochrome P450; ko00590 Arachidonic acid metabolism; ko01100 Metabolic pathways; ko05204 Chemical carcinogenesis;	IPR016040;	NAD(P)-binding domain;
CL11570Contig1_orf1	vacuolar H[+]-ATPase 26kD E subunit	27.417	0.790006	0.848413	1.15742	1.18479	1.60084	1.39082	0.714745	0.654578	0.596744	0.667568	0.771805	0.873504	cytosol	ion transmembrane transport; cation transmembrane transport; inorganic ion transmembrane transport; single-organism cellular process; energy coupled proton transmembrane transport, against electrochemical gradient; single-organism process; hydrogen transport; proton transport; establishment of localization; transport; transmembrane transport; single-organism localization; cation transport; ion tr…	macromolecular complex; membrane; proton-transporting two-sector ATPase complex, catalytic domain; protein complex; membrane part; proton-transporting two-sector ATPase complex;	active transmembrane transporter activity; ATPase activity, coupled to transmembrane movement of ions; ion transmembrane transporter activity; primary active transmembrane transporter activity; ATPase activity, coupled to transmembrane movement of ions, rotational mechanism; hydrolase activity, acting on acid anhydrides; substrate-specific transporter activity; monovalent inorganic cation transme…	K02150	ATPeV1E; V-type H+-transporting ATPase subunit E	ko04721 Synaptic vesicle cycle; ko04145 Phagosome; ko01100 Metabolic pathways; ko05120 Epithelial cell signaling in Helicobacter pylori infection; ko05323 Rheumatoid arthritis; ko04966 Collecting duct acid secretion; ko04150 mTOR signaling pathway; ko00190 Oxidative phosphorylation; ko05110 Vibrio cholerae infection;
CL11571Contig1_orf1	hypothetical protein DAPPUDRAFT_299971	26.089	0.730862	0.724255	0.525468	0.415017	0.743885	0.644183	1.36169	1.54557	2.04269	2.36602	1.02499	0.985571	extracellular							IPR011024; IPR001064;	Gamma-crystallin-related; Beta/gamma crystallin;
CL11584Contig1_orf1	hypothetical protein DAPPUDRAFT_309332	17.611	1.10437		0.812909		1.22788		0.968963		0.964001		0.898782		mitochondria				K10580	UBE2N; ubiquitin-conjugating enzyme E2 N [EC:2.3.2.23]	ko04624 Toll and Imd signaling pathway; ko04120 Ubiquitin mediated proteolysis;	IPR016135; IPR000608;	Ubiquitin-conjugating enzyme/RWD-like; Ubiquitin-conjugating enzyme E2;
CL11588Contig1_orf1	dendritic cell protein	44.791	0.983313	1.08883	1.26456	1.12456	1.18873	1.05015	0.682732	0.845127	0.893899	0.93138	0.702511	0.800064	cytosol		cell part; intracellular; cytoplasm; macromolecular complex; intracellular part; protein complex; cell; cytoplasmic part; eukaryotic translation initiation factor 3 complex;	organic cyclic compound binding; heterocyclic compound binding; RNA binding; translation factor activity, nucleic acid binding; binding; nucleic acid binding; translation initiation factor activity; protein binding;	K15030			IPR000717; IPR011991;	Proteasome component (PCI) domain; Winged helix-turn-helix DNA-binding domain;
CL11589Contig1_orf1	hypothetical protein DAPPUDRAFT_305518	31.652	0.977807	1.01952	1.05109	1.06165	1.07626	1.11161	0.994313	0.858099	0.787965	0.84029	1.04637	0.991353	plasma membrane	single-organism process; metabolic process; primary metabolic process; single-organism metabolic process; lipid metabolic process; organic substance metabolic process;	membrane; cell part; intracellular; membrane part; cytoplasm; intrinsic component of membrane; intracellular part; cell; integral component of membrane;	oxidoreductase activity, acting on the CH-CH group of donors; catalytic activity; oxidoreductase activity;				IPR001104;	3-oxo-5-alpha-steroid 4-dehydrogenase, C-terminal;
CL11597Contig1_orf1	mitochondrial ATP synthase gamma subunit precursor	33.91	0.82171	0.703784	1.67798	1.72165	1.13846	1.29774	0.554572	0.360811	0.692153	0.614233	0.562097	0.438926	mitochondria	nucleoside metabolic process; purine nucleoside metabolic process; purine ribonucleoside monophosphate metabolic process; nucleotide metabolic process; single-organism process; purine ribonucleoside biosynthetic process; nucleoside biosynthetic process; biosynthetic process; ribonucleoside monophosphate biosynthetic process; cellular metabolic process; phosphate-containing compound metabolic proc…	proton-transporting ATP synthase complex, catalytic core F(1); membrane; membrane part; cell part; intracellular; proton-transporting two-sector ATPase complex; macromolecular complex; proton-transporting two-sector ATPase complex, catalytic domain; intracellular part; protein complex; cell; proton-transporting ATP synthase complex;	active transmembrane transporter activity; ATPase activity, coupled to transmembrane movement of ions; ion transmembrane transporter activity; primary active transmembrane transporter activity; ATPase activity, coupled to transmembrane movement of ions, rotational mechanism; hydrolase activity, acting on acid anhydrides; substrate-specific transporter activity; monovalent inorganic cation transme…	K02136	ATPeF1G; F-type H+-transporting ATPase subunit gamma	ko05010 Alzheimer's disease; ko00190 Oxidative phosphorylation; ko01100 Metabolic pathways; ko05016 Huntington's disease; ko05012 Parkinson's disease;
CL11607Contig1_orf1	hypothetical protein DAPPUDRAFT_50141	38.524	0.921502		1.44087		1.20392		0.602001		0.793362		0.710635		plasma membrane	establishment of protein localization; transport; organic substance transport; localization; macromolecule localization; protein localization; protein transport; establishment of localization;	intrinsic component of membrane; membrane; integral component of membrane; membrane part;		K19995
CL11620Contig1_orf1	hypothetical protein CAPTEDRAFT_153512	124.14	1.43345	1.28762	1.06259	0.994636	0.993566	1.08462	0.767118	0.756965	0.84111	0.795406	0.894749	0.893984	mitochondria	cellular aromatic compound metabolic process; cellular protein metabolic process; single-organism process; biosynthetic process; tRNA aminoacylation; cellular metabolic process; organic substance metabolic process; metabolic process; cellular amino acid metabolic process; heterocycle metabolic process; nucleobase-containing compound metabolic process; cellular nitrogen compound metabolic process;…		ligase activity, forming aminoacyl-tRNA and related compounds; aminoacyl-tRNA editing activity; ATP binding; carboxylic ester hydrolase activity; nucleoside phosphate binding; ligase activity, forming carbon-oxygen bonds; ligase activity; nucleoside binding; ion binding; hydrolase activity; nucleotide binding; organic cyclic compound binding; heterocyclic compound binding; ribonucleoside binding;…	K01873	VARS; valyl-tRNA synthetase [EC:6.1.1.9]	ko00970 Aminoacyl-tRNA biosynthesis;	IPR014729; IPR013155; IPR009008; IPR002300; IPR033705; IPR009080;	Rossmann-like alpha/beta/alpha sandwich fold; Methionyl/Valyl/Leucyl/Isoleucyl-tRNA synthetase, anticodon-binding; Valyl/Leucyl/Isoleucyl-tRNA synthetase, editing domain; Aminoacyl-tRNA synthetase, class Ia; Valyl tRNA synthetase, anticodon-binding domain; Aminoacyl-tRNA synthetase, class Ia, anticodon-binding;
CL11623Contig1_orf1	triose-phosphate isomerase	29.756	0.855257	0.836928	1.03202	1.04091	1.20919	1.18392	0.862949	0.832198	0.713792	0.72173	1.19626	1.24412	mitochondria	single-organism carbohydrate catabolic process; glycolytic process; single-organism catabolic process; small molecule metabolic process; single-organism cellular process; single-organism process; primary metabolic process; carbohydrate metabolic process; cellular metabolic process; organic substance metabolic process; carbohydrate catabolic process; single-organism carbohydrate metabolic process;…		isomerase activity; intramolecular oxidoreductase activity; triose-phosphate isomerase activity; catalytic activity; intramolecular oxidoreductase activity, interconverting aldoses and ketoses;	K01803	TPI; triosephosphate isomerase (TIM) [EC:5.3.1.1]	ko00051 Fructose and mannose metabolism; ko01130 Biosynthesis of antibiotics; ko01110 Biosynthesis of secondary metabolites; ko00710 Carbon fixation in photosynthetic organisms; ko01230 Biosynthesis of amino acids; ko01100 Metabolic pathways; ko00562 Inositol phosphate metabolism; ko01120 Microbial metabolism in diverse environments; ko01200 Carbon metabolism; ko00010 Glycolysis / Gluconeogenesis;	IPR013785;	Aldolase-type TIM barrel;
CL11629Contig1_orf1	predicted protein	15.361	1.00489	1.00918	1.00261	1.03547	0.934531	0.944005	0.861902	0.796649	1.08299	1.07078	1.05448	1.04174	cytosol							IPR013813;	Endoribonuclease L-PSP/chorismate mutase-like;
CL11634Contig1_orf1	mitochondrial cytochrome c oxidase subunit VIc	9.2507	1.45372	1.4124	1.32439	1.23053	0.997189	0.986336	0.645999	0.64771	0.613058	0.650209	0.701894	0.767961	mitochondria			ion transmembrane transporter activity; substrate-specific transporter activity; monovalent inorganic cation transmembrane transporter activity; oxidoreductase activity, acting on a heme group of donors, oxygen as acceptor; oxidoreductase activity, acting on a heme group of donors; hydrogen ion transmembrane transporter activity; heme-copper terminal oxidase activity; oxidoreductase activity; sub…	K02268	COX6C; cytochrome c oxidase subunit 6c	ko04260 Cardiac muscle contraction; ko05010 Alzheimer's disease; ko00190 Oxidative phosphorylation; ko01100 Metabolic pathways; ko05016 Huntington's disease; ko04932 Non-alcoholic fatty liver disease (NAFLD); ko05012 Parkinson's disease;
CL11640Contig1_orf1	2,4-dienoyl-CoA reductase, mitochondrial-like	37.805	0.980356	0.992544	1.11338	1.14235	1.072	1.05255	0.808773	0.691715	1.06717	1.05952	0.797047	0.712455	mitochondria				K13236			IPR016040;	NAD(P)-binding domain;
CL11643Contig1_orf1	ribosomal protein S3a	33.176	0.96299	0.75585	1.2689	1.49019	1.23545	1.3291	0.703966	0.596462	0.809124	0.58351	0.835006	0.679582	mitochondria	cellular protein metabolic process; biosynthetic process; primary metabolic process; cellular metabolic process; organic substance biosynthetic process; cellular biosynthetic process; organic substance metabolic process; metabolic process; cellular macromolecule biosynthetic process; cellular macromolecule metabolic process; gene expression; macromolecule metabolic process; protein metabolic proc…	ribosome; organelle; intracellular organelle; intracellular non-membrane-bounded organelle; cell part; intracellular; cytoplasm; macromolecular complex; intracellular part; cell; ribonucleoprotein complex; cytoplasmic part; non-membrane-bounded organelle;	structural constituent of ribosome; structural molecule activity;	K02984	RP-S3Ae; small subunit ribosomal protein S3Ae	ko03010 Ribosome;
CL11658Contig1_orf1	reactive oxygen species modulator 1	9.1375	0.887225	0.906153	0.920703	0.937246	0.903488	0.781069	1.10093	0.942794	1.05574	1.36529	1.22653	1.25272	extracellular
CL11665Contig1_orf1	predicted protein	46.322	0.883568	0.887478	0.860191	0.835174	0.737581	0.721789	1.0307	1.05311	1.38491	1.42936	1.29974	1.31948	extracellular	metabolic process; carbohydrate metabolic process; primary metabolic process; organic substance metabolic process;		hydrolase activity; catalytic activity; hydrolase activity, acting on carbon-nitrogen (but not peptide) bonds;				IPR011330; IPR002509;	Glycoside hydrolase/deacetylase, beta/alpha-barrel; NodB homology domain;
CL11669Contig1_orf1	transmembrane protein 214	78.705	1.14409	1.07383	0.873177	0.960688	1.02675	0.953695	0.826216	0.899652	1.03242	1.09597	1.09185	1.0423	nuclear
CL11672Contig1_orf1	Dynactin subunit 6	20.462		0.850575		1.6158		1.34152		0.546672		0.415437		0.623381	cytosol				K10428	DCTN6; dynactin 6	ko04962 Vasopressin-regulated water reabsorption;	IPR011004;	Trimeric LpxA-like;
CL11678Contig1_orf1	aspartate aminotransferase, cytoplasmic	46.906	0.637915	0.604843	0.768237	0.595435	1.71222	2.07543	0.802908	0.793742	0.996066	0.999073	0.732497	0.690038	mitochondria	small molecule metabolic process; single-organism cellular process; nitrogen compound metabolic process; single-organism process; biosynthetic process; primary metabolic process; cellular metabolic process; organic substance metabolic process; metabolic process; cellular amino acid metabolic process; single-organism metabolic process; carboxylic acid metabolic process; organic acid metabolic proc…		organic cyclic compound binding; heterocyclic compound binding; transferase activity, transferring nitrogenous groups; catalytic activity; binding; ion binding; anion binding; transaminase activity; transferase activity; cofactor binding; pyridoxal phosphate binding;	K14454	GOT1; aspartate aminotransferase, cytoplasmic [EC:2.6.1.1]	ko00270 Cysteine and methionine metabolism; ko01130 Biosynthesis of antibiotics; ko00710 Carbon fixation in photosynthetic organisms; ko00350 Tyrosine metabolism; ko00360 Phenylalanine metabolism; ko01210 2-Oxocarboxylic acid metabolism; ko00250 Alanine, aspartate and glutamate metabolism; ko00330 Arginine and proline metabolism; ko01200 Carbon metabolism; ko01110 Biosynthesis of secondary metabo…	IPR004839; IPR015424; IPR015421;	Aminotransferase, class I/classII; Pyridoxal phosphate-dependent transferase; Pyridoxal phosphate-dependent transferase, major region, subdomain 1;
CL11679Contig1_orf1	hypothetical protein DAPPUDRAFT_50689	51.375	0.844473		1.40692		1.14965		0.901283		0.651919		0.782352		mitochondria	metabolic process;		transferase activity, transferring acyl groups; transferase activity, transferring acyl groups other than amino-acyl groups; catalytic activity; transferase activity;	K07509	HADHB; acetyl-CoA acyltransferase [EC:2.3.1.16]	ko00280 Valine, leucine and isoleucine degradation; ko01130 Biosynthesis of antibiotics; ko00071 Fatty acid degradation; ko01110 Biosynthesis of secondary metabolites; ko01212 Fatty acid metabolism; ko01100 Metabolic pathways; ko00062 Fatty acid elongation;	IPR016039; IPR020616; IPR020617;	Thiolase-like; Thiolase, N-terminal; Thiolase, C-terminal;
CL11681Contig1_orf1	lectin A isoform 1	18.628	0.786891	0.766442	0.769668	0.798607	0.632356	0.584449	1.17538	1.18666	1.79172	1.76656	1.24101	1.27033	extracellular							IPR001304; IPR016187; IPR016186;	C-type lectin-like; C-type lectin fold; C-type lectin-like/link domain;
CL11682Contig1_orf1	hypothetical protein X975_18720, partial	26.709		1.2571		0.93592		0.701787		0.776598		0.968126		1.51867	mitochondria							IPR004302;	Chitin-binding protein, N-terminal;
CL11717Contig1_orf1	estradiol 17-beta-dehydrogenase 8 isoform X1	28.781	0.845686	0.866877	0.929462	0.905922	0.792867	0.83114	0.833371	0.844464	1.69747	1.59885	1.02502	1.06312	extracellular				K13370	HSD17B8; 17beta-estradiol 17-dehydrogenase / 3alpha(17beta)-hydroxysteroid dehydrogenase (NAD+) [EC:1.1.1.62 1.1.1.239]	ko01100 Metabolic pathways; ko00140 Steroid hormone biosynthesis;	IPR016040;	NAD(P)-binding domain;
CL11731Contig1_orf1	translationally controlled tumor protein	23.554	0.903261	0.88482	1.1422	1.14433	1.45547	1.41148	0.639541	0.595772	0.903814	0.843802	0.67392	0.741883	mitochondria							IPR011323; IPR011057;	Mss4/translationally controlled tumour-associated TCTP; Mss4-like;
CL11732Contig1_orf1	protein phosphatase	23.02	0.869037	0.761563	1.1159	1.17699	1.24958	1.34043	0.804515	0.667529	0.94751	0.972503	0.842824	0.754068	extracellular			hydrolase activity; catalytic activity;				IPR029052; IPR004843; IPR006186;	Metallo-dependent phosphatase-like; Calcineurin-like phosphoesterase domain, ApaH type; Serine/threonine-specific protein phosphatase/bis(5-nucleosyl)-tetraphosphatase;
CL11743Contig1_orf1	syntaxin-1A, putative	34.717		1.28848		0.695626		0.993982		1.15161		0.83129		1.1884	plasma membrane	establishment of protein localization; transport; intracellular transport; cellular macromolecule localization; establishment of localization in cell; vesicle-mediated transport; intracellular protein transport; organic substance transport; protein localization; macromolecule localization; cellular protein localization; localization; protein transport; establishment of localization; cellular loca…	membrane;	SNAP receptor activity; protein binding; binding;	K04560	STX1A; syntaxin 1A	ko04911 Insulin secretion; ko04721 Synaptic vesicle cycle; ko05031 Amphetamine addiction; ko04130 SNARE interactions in vesicular transport;	IPR000727; IPR010989; IPR006011;	Target SNARE coiled-coil homology domain; t-SNARE; Syntaxin, N-terminal domain;
CL11744Contig1_orf1	chitinase 1C	47.32	1.40207	1.43377	0.694864	0.741219	0.745277	0.744518	1.34176	1.30323	0.973323	0.992888	1.12734	1.12404	extracellular	glucosamine-containing compound metabolic process; chitin metabolic process; aminoglycan catabolic process; carbohydrate derivative catabolic process; nitrogen compound metabolic process; chitin catabolic process; carbohydrate metabolic process; primary metabolic process; glucosamine-containing compound catabolic process; organic substance metabolic process; organic substance catabolic process; m…		hydrolase activity, hydrolyzing O-glycosyl compounds; hydrolase activity; chitinase activity; catalytic activity; hydrolase activity, acting on glycosyl bonds;				IPR001223; IPR011583; IPR029070; IPR017853; IPR013781;	Glycoside hydrolase family 18, catalytic domain; Chitinase II; Chitinase insertion domain; Glycoside hydrolase superfamily; Glycoside hydrolase, catalytic domain;
CL11751Contig1_orf1	protein phosphatase	16.228		0.877125		1.13505		0.77913		0.932453		1.31882		1.03567	extracellular			hydrolase activity; catalytic activity;				IPR029052; IPR004843; IPR031675; IPR006186;	Metallo-dependent phosphatase-like; Calcineurin-like phosphoesterase domain, ApaH type; Serine-threonine protein phosphatase, N-terminal; Serine/threonine-specific protein phosphatase/bis(5-nucleosyl)-tetraphosphatase;
CL11763Contig1_orf1	zinc proteinase Mpc1	29.668	0.95394	0.96348	0.486917	0.586562	0.603684	0.602628	1.12725	1.15854	1.60166	1.61535	1.42054	1.34613	extracellular	proteolysis; metabolic process; macromolecule metabolic process; protein metabolic process; primary metabolic process; organic substance metabolic process;		endopeptidase activity; metalloendopeptidase activity; peptidase activity; transition metal ion binding; catalytic activity; binding; ion binding; cation binding; metal ion binding; peptidase activity, acting on L-amino acid peptides; hydrolase activity; metallopeptidase activity; zinc ion binding;				IPR001506; IPR024079; IPR034035; IPR006026;	Peptidase M12A; Metallopeptidase, catalytic domain; Astacin-like metallopeptidase domain; Peptidase, metallopeptidase;
CL11767Contig1_orf1	Gamma-crystallin A	29.601	1.17107	1.13779	0.578854	0.757743	0.65608	0.798025	1.6384	1.39778	1.10362	0.898855	1.16918	1.11855	mitochondria							IPR011024;	Gamma-crystallin-related;
CL11769Contig1_orf1	hypothetical protein CAPTEDRAFT_170278	100.91	0.561078	0.763169	2.38342	1.52233	1.23459	1.1484	0.378148	0.807861	0.276096	0.626102	0.377354	0.752698	cytosol	cofactor biosynthetic process; pteridine-containing compound biosynthetic process; cellular aromatic compound metabolic process; organic acid biosynthetic process; cellular modified amino acid biosynthetic process; single-organism process; biosynthetic process; organonitrogen compound biosynthetic process; cellular metabolic process; organic substance metabolic process; metabolic process; cellula…		oxidoreductase activity, acting on the CH-NH group of donors; ATP binding; nucleoside phosphate binding; ligase activity; nucleoside binding; ion binding; methylenetetrahydrofolate dehydrogenase (NADP+) activity; nucleotide binding; oxidoreductase activity; ligase activity, forming carbon-nitrogen bonds; organic cyclic compound binding; heterocyclic compound binding; ribonucleoside binding; carbo…	K00288	MTHFD; methylenetetrahydrofolate dehydrogenase (NADP+) / methenyltetrahydrofolate cyclohydrolase / formyltetrahydrofolate synthetase [EC:1.5.1.5 3.5.4.9 6.3.4.3]	ko00670 One carbon pool by folate; ko01100 Metabolic pathways;	IPR020631; IPR016040; IPR027417; IPR020630;	Tetrahydrofolate dehydrogenase/cyclohydrolase, NAD(P)-binding domain; NAD(P)-binding domain; P-loop containing nucleoside triphosphate hydrolase; Tetrahydrofolate dehydrogenase/cyclohydrolase, catalytic domain;
CL11770Contig1_orf1	Dolichyl-diphosphooligosaccharide--protein glycosyltransferase subunit 2	69.759	0.874744	0.832916	1.35118	1.34244	1.29345	1.26003	0.668113	0.677254	0.690732	0.715685	0.832418	0.788549	plasma membrane	protein glycosylation; macromolecule glycosylation; glycoprotein biosynthetic process; single-organism cellular process; cellular protein metabolic process; glycoprotein metabolic process; single-organism process; biosynthetic process; primary metabolic process; carbohydrate metabolic process; cellular metabolic process; organic substance biosynthetic process; cellular biosynthetic process; organ…	membrane; intracellular organelle; endoplasmic reticulum; nuclear outer membrane-endoplasmic reticulum membrane network; bounding membrane of organelle; organelle membrane; cytoplasm; intracellular organelle part; intrinsic component of membrane; endomembrane system; macromolecular complex; intracellular part; oligosaccharyltransferase complex; transferase complex; cell; integral component of mem…		K12667	SWP1; oligosaccharyltransferase complex subunit delta (ribophorin II)	ko04141 Protein processing in endoplasmic reticulum; ko00513 Various types of N-glycan biosynthesis; ko01100 Metabolic pathways; ko00510 N-Glycan biosynthesis;
CL11772Contig1_orf1	protein YIPF1-like	49.06	0.628663	0.608302	1.7378	1.49256	0.991095	1.46596	0.716359	0.596761	0.75323	0.567191	0.76533	0.697007	plasma membrane		membrane;					IPR006977;	Yip1 domain;
CL11773Contig1_orf1	mitochondrial import inner membrane translocase subunit Tim8 isoform X2	15.732	1.23304	1.18026	0.983896	1.03016	0.877186	0.869688	1.03726	0.957102	0.934395	0.965576	1.08034	1.04647	nuclear				K17780			IPR004217;	Tim10/DDP family zinc finger;
CL11774Contig1_orf1	aconitate mitochondrial-like protein	86.138	1.08303	1.04027	0.9709	1.26397	1.13279	1.22061	1.02787	0.859406	0.7813	0.638026	0.825381	0.660014	mitochondria	tricarboxylic acid metabolic process; oxidation-reduction process; small molecule metabolic process; single-organism cellular process; tricarboxylic acid cycle; single-organism process; primary metabolic process; cellular respiration; cellular metabolic process; organic substance metabolic process; citrate metabolic process; metabolic process; generation of precursor metabolites and energy; aerob…		catalytic activity; binding; iron-sulfur cluster binding; aconitate hydratase activity; lyase activity; hydro-lyase activity; 4 iron, 4 sulfur cluster binding; carbon-oxygen lyase activity; metal cluster binding;	K01681	ACO; aconitate hydratase [EC:4.2.1.3]	ko00720 Carbon fixation pathways in prokaryotes; ko01130 Biosynthesis of antibiotics; ko01110 Biosynthesis of secondary metabolites; ko01230 Biosynthesis of amino acids; ko01100 Metabolic pathways; ko01210 2-Oxocarboxylic acid metabolism; ko00020 Citrate cycle (TCA cycle); ko01120 Microbial metabolism in diverse environments; ko01200 Carbon metabolism; ko00630 Glyoxylate and dicarboxylate metabol…	IPR001030; IPR000573; IPR015932; IPR015928; IPR015931;	Aconitase/3-isopropylmalate dehydratase large subunit, alpha/beta/alpha domain; Aconitase A/isopropylmalate dehydratase small subunit, swivel domain; Aconitase/3-isopropylmalate dehydratase large subunit, alpha/beta/alpha, subdomain 2; Aconitase/3-isopropylmalate dehydratase, swivel; Aconitase/3-isopropylmalate dehydratase large subunit, alpha/beta/alpha, subdomain 1/3;
CL11777Contig2_orf1	40S ribosomal protein S13	19.96	0.933089	0.935471	1.02952	1.00573	1.12166	1.07787	0.866125	0.671806	1.13462	1.50882	0.849478	0.714311	cytosol	cellular protein metabolic process; biosynthetic process; primary metabolic process; cellular metabolic process; organic substance biosynthetic process; cellular biosynthetic process; organic substance metabolic process; metabolic process; cellular macromolecule biosynthetic process; cellular macromolecule metabolic process; gene expression; macromolecule metabolic process; protein metabolic proc…	ribosome; organelle; intracellular organelle; intracellular non-membrane-bounded organelle; cell part; intracellular; cytoplasm; macromolecular complex; intracellular part; cell; ribonucleoprotein complex; cytoplasmic part; non-membrane-bounded organelle;	structural constituent of ribosome; structural molecule activity;	K02953	RP-S13e; small subunit ribosomal protein S13e	ko03010 Ribosome;	IPR012606; IPR009068;	Ribosomal protein S13/S15, N-terminal; S15/NS1, RNA-binding;
CL11779Contig1_orf1	eukaryotic translation initiation factor 4 gamma 1-like isoform X2	129.76	1.08719	0.991954	1.12093	1.07721	1.2647	1.24093	0.750402	0.775472	0.900992	0.798046	0.728169	0.771079	nuclear			organic cyclic compound binding; heterocyclic compound binding; RNA binding; protein binding; binding; nucleic acid binding;	K03260	EIF4G; translation initiation factor 4G	ko05416 Viral myocarditis; ko03013 RNA transport;	IPR003307; IPR003891; IPR016024; IPR003890; IPR016021;	W2 domain; Initiation factor eIF-4 gamma, MA3; Armadillo-type fold; MIF4G-like, type 3; MIF4G-like domain;
CL11783Contig1_orf1	calreticulin	48.558	1.10706	1.08188	1.04823	1.06121	1.10728	1.10455	0.65319	0.619664	1.10251	1.08135	0.855083	0.850992	extracellular	protein folding; metabolic process; cellular protein metabolic process; cellular macromolecule metabolic process; macromolecule metabolic process; protein metabolic process; primary metabolic process; cellular process; cellular metabolic process; organic substance metabolic process;	organelle; intracellular membrane-bounded organelle; intracellular organelle; endoplasmic reticulum; cell part; intracellular; cytoplasm; endomembrane system; intracellular part; membrane-bounded organelle; cell; cytoplasmic part;	cation binding; metal ion binding; protein binding; calcium ion binding; unfolded protein binding; binding; ion binding;	K08057	CALR; calreticulin	ko04612 Antigen processing and presentation; ko04141 Protein processing in endoplasmic reticulum; ko05142 Chagas disease (American trypanosomiasis); ko04145 Phagosome; ko05166 HTLV-I infection;	IPR009033; IPR013320;	Calreticulin/calnexin, P domain; Concanavalin A-like lectin/glucanase domain;
CL11785Contig1_orf1	ecdysteroid regulated-like protein	17.157	1.10316	1.06453	0.650868	0.742146	0.766674	0.892108	1.22039	1.00294	1.18868	1.369	1.36737	1.2296	extracellular				K13443	NPC2; Niemann-Pick C2 protein	ko04142 Lysosome;	IPR014756; IPR003172;	Immunoglobulin E-set; MD-2-related lipid-recognition domain;
CL11788Contig1_orf1	hypothetical protein DAPPUDRAFT_299812	48.362	0.527272		2.04829		1.30482		0.371704		0.614395		0.483795		cytosol	organic substance catabolic process; metabolic process; protein catabolic process; macromolecule catabolic process; macromolecule metabolic process; protein metabolic process; primary metabolic process; catabolic process; organic substance metabolic process;	intracellular part; cell; cell part; intracellular; cytoplasm;	ATP binding; nucleoside phosphate binding; nucleoside binding; ion binding; hydrolase activity; nucleotide binding; organic cyclic compound binding; heterocyclic compound binding; ribonucleoside binding; carbohydrate derivative binding; catalytic activity; ribonucleotide binding; binding; purine ribonucleoside binding; purine ribonucleotide binding; anion binding; adenyl ribonucleotide binding; a…	K03065	PSMC3; 26S proteasome regulatory subunit T5	ko05169 Epstein-Barr virus infection; ko03050 Proteasome;	IPR003593; IPR003959; IPR027417;	AAA+ ATPase domain; ATPase, AAA-type, core; P-loop containing nucleoside triphosphate hydrolase;
CL11789Contig1_orf1	lambda-crystallin homolog	36.322	0.778647	0.803729	1.19831	1.2123	0.822448	0.805575	0.799501	0.772988	1.27389	1.29597	0.94051	1.02747	cytosol	oxidation-reduction process; small molecule metabolic process; single-organism cellular process; single-organism process; cellular lipid metabolic process; fatty acid metabolic process; primary metabolic process; cellular metabolic process; organic substance metabolic process; metabolic process; single-organism metabolic process; carboxylic acid metabolic process; monocarboxylic acid metabolic pr…		oxidoreductase activity, acting on CH-OH group of donors; oxidoreductase activity, acting on the CH-OH group of donors, NAD or NADP as acceptor; 3-hydroxyacyl-CoA dehydrogenase activity; catalytic activity; oxidoreductase activity;	K13247	CRYL1; L-gulonate 3-dehydrogenase [EC:1.1.1.45]	ko01100 Metabolic pathways; ko00040 Pentose and glucuronate interconversions;	IPR008927; IPR013328; IPR016040; IPR006176; IPR006108;	6-phosphogluconate dehydrogenase C-terminal domain-like; 6-phosphogluconate dehydrogenase, domain 2; NAD(P)-binding domain; 3-hydroxyacyl-CoA dehydrogenase, NAD binding; 3-hydroxyacyl-CoA dehydrogenase, C-terminal;
CL11795Contig1_orf1	gamma-interferon-inducible lysosomal thiol reductase	24.929	0.946567	0.970945	0.575687	0.634149	0.567029	0.575232	1.17682	1.16071	1.89589	1.8545	1.30951	1.30805	extracellular				K08059	IFI30; interferon, gamma-inducible protein 30	ko04612 Antigen processing and presentation;
CL11797Contig1_orf1	hypothetical protein CAPTEDRAFT_149382	53.543	0.961136	0.953188	0.727413	0.773097	0.746987	0.780568	1.36598	1.37346	1.25349	1.20352	1.17252	1.17542	mitochondria	metabolic process; carbohydrate metabolic process; primary metabolic process; organic substance metabolic process;		isomerase activity; intramolecular oxidoreductase activity; catalytic activity; intramolecular oxidoreductase activity, interconverting aldoses and ketoses; xylose isomerase activity;				IPR013022;	Xylose isomerase-like, TIM barrel domain;
CL11801Contig1_orf1	ribosomal protein L44	12.644	1.30955	1.17446	1.40751	0.992803	0.980749	0.937182	0.692808	0.857742	0.563	0.918396	0.800299	1.11711	extracellular	cellular protein metabolic process; biosynthetic process; primary metabolic process; cellular metabolic process; organic substance biosynthetic process; cellular biosynthetic process; organic substance metabolic process; metabolic process; cellular macromolecule biosynthetic process; cellular macromolecule metabolic process; gene expression; macromolecule metabolic process; protein metabolic proc…	ribosome; organelle; intracellular organelle; intracellular non-membrane-bounded organelle; cell part; intracellular; cytoplasm; macromolecular complex; intracellular part; cell; ribonucleoprotein complex; cytoplasmic part; non-membrane-bounded organelle;	structural constituent of ribosome; structural molecule activity;	K02929	RP-L44e; large subunit ribosomal protein L44e	ko03010 Ribosome;	IPR011332;	Zinc-binding ribosomal protein;
CL11814Contig1_orf1	hypothetical protein DAPPUDRAFT_128102	54.979	1.08226	0.951173	1.28745	1.25261	0.883677	0.945538	0.847582	0.759499	1.06182	1.13907	0.742603	0.756578	mitochondria			organic cyclic compound binding; heterocyclic compound binding; transferase activity, transferring nitrogenous groups; catalytic activity; binding; ion binding; anion binding; transaminase activity; transferase activity; cofactor binding; pyridoxal phosphate binding;	K00827	AGXT2; alanine-glyoxylate transaminase / (R)-3-amino-2-methylpropionate-pyruvate transaminase [EC:2.6.1.44 2.6.1.40]	ko00270 Cysteine and methionine metabolism; ko00280 Valine, leucine and isoleucine degradation; ko00250 Alanine, aspartate and glutamate metabolism; ko01110 Biosynthesis of secondary metabolites; ko00260 Glycine, serine and threonine metabolism; ko01100 Metabolic pathways;	IPR015424; IPR015422; IPR015421;	Pyridoxal phosphate-dependent transferase; Pyridoxal phosphate-dependent transferase, major region, subdomain 2; Pyridoxal phosphate-dependent transferase, major region, subdomain 1;
CL11819Contig1_orf1	mitochondrial pyruvate carrier 2-like	14.128	0.768811		1.16512		1.047		0.910251		1.03553		0.986528		mitochondria	intracellular transport; mitochondrial transport; single-organism process; organic substance transport; carboxylic acid transport; organic acid transport; single-organism intracellular transport; establishment of localization; cellular localization; transport; anion transport; organic anion transport; establishment of localization in cell; single-organism localization; monocarboxylic acid transpo…	membrane; intracellular organelle; mitochondrial part; organelle membrane; organelle envelope; intracellular organelle part; cytoplasm; intracellular part; cell; organelle part; mitochondrion; mitochondrial envelope; intracellular membrane-bounded organelle; organelle; cell part; intracellular; envelope; organelle inner membrane; membrane-bounded organelle; mitochondrial inner membrane; mitochond…
CL11830Contig2_orf1	hypothetical protein DAPPUDRAFT_309434	49.845	1.18081	1.20187	0.746489	0.705906	0.848018	0.838027	1.34729	1.39484	0.884319	0.933054	1.09486	1.10808	plasma membrane	metabolic process; carbohydrate metabolic process; primary metabolic process; organic substance metabolic process;		hydrolase activity, hydrolyzing O-glycosyl compounds; hydrolase activity; catalytic activity; hydrolase activity, acting on glycosyl bonds;	K01189	GLA; alpha-galactosidase [EC:3.2.1.22]	ko00603 Glycosphingolipid biosynthesis - globo and isoglobo series; ko00052 Galactose metabolism; ko00600 Sphingolipid metabolism; ko00561 Glycerolipid metabolism; ko04142 Lysosome;	IPR013785; IPR013780; IPR017853;	Aldolase-type TIM barrel; Glycosyl hydrolase, all-beta; Glycoside hydrolase superfamily;
CL11832Contig1_orf1	succinate dehydrogenase complex subunit A, partial	33.745	1.08045	0.979511	1.58513	1.51058	0.946488	1.01046	0.665022	0.662419	0.754861	0.676526	0.760276	0.816145	mitochondria	tricarboxylic acid metabolic process; oxidation-reduction process; small molecule metabolic process; single-organism cellular process; tricarboxylic acid cycle; single-organism process; primary metabolic process; cellular respiration; cellular metabolic process; organic substance metabolic process; citrate metabolic process; metabolic process; generation of precursor metabolites and energy; aerob…		electron carrier activity; 2 iron, 2 sulfur cluster binding; catalytic activity; binding; iron-sulfur cluster binding; metal cluster binding; oxidoreductase activity;	K00235	SDHB; succinate dehydrogenase (ubiquinone) iron-sulfur subunit [EC:1.3.5.1]	ko01130 Biosynthesis of antibiotics; ko01110 Biosynthesis of secondary metabolites; ko01100 Metabolic pathways; ko04932 Non-alcoholic fatty liver disease (NAFLD); ko00020 Citrate cycle (TCA cycle); ko01120 Microbial metabolism in diverse environments; ko05010 Alzheimer's disease; ko01200 Carbon metabolism; ko00190 Oxidative phosphorylation; ko05016 Huntington's disease; ko05012 Parkinson's diseas…	IPR017896; IPR001041; IPR009051; IPR012675; IPR025192;	4Fe-4S ferredoxin-type, iron-sulphur binding domain; 2Fe-2S ferredoxin-type iron-sulfur binding domain; Alpha-helical ferredoxin; Beta-grasp domain; Succinate dehydogenase/fumarate reductase N-terminal;
CL11833Contig1_orf1	NDUFA13	17.345	0.861248	0.908404	1.70004	1.50625	1.2844	1.2203	0.519235	0.626975	0.534892	0.549335	0.604437	0.708837	cytosol				K11353	NDUFA13; NADH dehydrogenase (ubiquinone) 1 alpha subcomplex subunit 13	ko05010 Alzheimer's disease; ko00190 Oxidative phosphorylation; ko01100 Metabolic pathways; ko05016 Huntington's disease; ko04932 Non-alcoholic fatty liver disease (NAFLD); ko05012 Parkinson's disease;
CL11851Contig1_orf1	hypothetical protein BRAFLDRAFT_121174	54.274	0.973244	1.01782	1.07649	1.16796	1.00022	1.07459	0.887443	0.913926	0.935786	0.886173	1.07885	0.781972	cytosol	cofactor biosynthetic process; nucleotide biosynthetic process; pyridine nucleotide metabolic process; cellular aromatic compound metabolic process; nicotinamide nucleotide metabolic process; nucleotide metabolic process; single-organism process; biosynthetic process; pyridine nucleotide biosynthetic process; organonitrogen compound biosynthetic process; cellular metabolic process; pyridine-conta…		transferase activity, transferring pentosyl groups; transferase activity, transferring glycosyl groups; nicotinate-nucleotide diphosphorylase (carboxylating) activity; catalytic activity; transferase activity;	K03462	NAMPT; nicotinamide phosphoribosyltransferase [EC:2.4.2.12]	ko04621 NOD-like receptor signaling pathway; ko01100 Metabolic pathways; ko00760 Nicotinate and nicotinamide metabolism;	IPR002638;	Quinolinate phosphoribosyl transferase, C-terminal;
CL11858Contig1_orf1	hypothetical protein DAPPUDRAFT_299971	25.4	1.52502		0.663808		0.790672		2.13465		0.51833		0.663583		extracellular							IPR011024; IPR001064;	Gamma-crystallin-related; Beta/gamma crystallin;
CL11865Contig1_orf1	NAD(P) transhydrogenase, mitochondrial	112.96	1.12028	1.15601	1.02786	1.01197	0.989584	0.975214	0.911245	0.986174	0.796351	0.748651	1.10361	1.1201	plasma membrane	transport; metabolic process; single-organism localization; cation transport; oxidation-reduction process; single-organism metabolic process; ion transport; single-organism process; localization; monovalent inorganic cation transport; hydrogen transport; proton transport; single-organism transport; establishment of localization;	intrinsic component of membrane; membrane; integral component of membrane; membrane part;	oxidoreductase activity, acting on NAD(P)H; nucleoside phosphate binding; nucleotide binding; cofactor binding; NAD(P)+ transhydrogenase activity; NAD(P)+ transhydrogenase (AB-specific) activity; oxidoreductase activity; heterocyclic compound binding; organic cyclic compound binding; oxidoreductase activity, acting on NAD(P)H, NAD(P) as acceptor; catalytic activity; binding; NADP binding; small m…	K00323	NNT; NAD(P) transhydrogenase [EC:1.6.1.2]	ko01100 Metabolic pathways; ko00760 Nicotinate and nicotinamide metabolism;	IPR007698; IPR029035; IPR007886; IPR016040; IPR024605; IPR023753;	Alanine dehydrogenase/pyridine nucleotide transhydrogenase, NAD(H)-binding domain; DHS-like NAD/FAD-binding domain; Alanine dehydrogenase/pyridine nucleotide transhydrogenase, N-terminal; NAD(P)-binding domain; NAD(P) transhydrogenase, alpha subunit, C-terminal; FAD/NAD(P)-binding domain;
CL11867Contig1_orf1	Maltase-glucoamylase, intestinal	105.06	1.78771	1.76352	0.573611	0.621613	0.745668	0.741605	1.16299	1.15172	1.04433	1.03141	0.92916	0.920976	extracellular	metabolic process; carbohydrate metabolic process; primary metabolic process; organic substance metabolic process;		carbohydrate binding; hydrolase activity, hydrolyzing O-glycosyl compounds; hydrolase activity; catalytic activity; binding; hydrolase activity, acting on glycosyl bonds;				IPR011013; IPR031727; IPR017853;	Galactose mutarotase-like domain; Galactose mutarotase, N-terminal barrel; Glycoside hydrolase superfamily;
CL11869Contig1_orf1	uncharacterized protein LOC105687303	56.259	0.916521	0.818637	1.06908	1.24391	1.13033	1.32208	0.927354	0.68599	0.997415	0.89054	0.871861	0.679336	plasma membrane							IPR000716;	Thyroglobulin type-1;
CL11873Contig1_orf1	Neuronal acetylcholine receptor subunit alpha-2 precursor	49.447	0.763036		1.4644		1.24682		0.691937		0.759813		0.734138		plasma membrane	transport; single-organism localization; ion transport; single-organism process; localization; establishment of localization; single-organism transport;	intrinsic component of membrane; membrane; integral component of membrane; membrane part;	ligand-gated ion channel activity; extracellular ligand-gated ion channel activity; ligand-gated channel activity; ion transmembrane transporter activity; substrate-specific channel activity; passive transmembrane transporter activity; substrate-specific transporter activity; ion channel activity; gated channel activity; channel activity; substrate-specific transmembrane transporter activity; tra…	K05312			IPR006029; IPR006202;	Neurotransmitter-gated ion-channel transmembrane domain; Neurotransmitter-gated ion-channel ligand-binding domain;
CL11877Contig1_orf1	hypothetical protein DAPPUDRAFT_230075	22.87	1.54599		0.696311		0.865575		1.17729		0.742914		1.13446		extracellular			pigment binding; binding;	K03098			IPR012674; IPR000566; IPR011038;	Calycin; Lipocalin/cytosolic fatty-acid binding domain; Calycin-like;
CL11880Contig1_orf1	glycogen phosphorylase	98.549	0.832931	0.99133	1.6391	1.36476	0.780163	0.757073	0.908754	0.967285	0.865128	0.992037	0.690139	0.82213	mitochondria	metabolic process; carbohydrate metabolic process; primary metabolic process; organic substance metabolic process;		organic cyclic compound binding; heterocyclic compound binding; transferase activity, transferring hexosyl groups; catalytic activity; binding; phosphorylase activity; ion binding; transferase activity, transferring glycosyl groups; anion binding; transferase activity; cofactor binding; glycogen phosphorylase activity; pyridoxal phosphate binding;	K00688	PYG; glycogen phosphorylase [EC:2.4.1.1]	ko00500 Starch and sucrose metabolism; ko01110 Biosynthesis of secondary metabolites; ko04922 Glucagon signaling pathway; ko01100 Metabolic pathways; ko04931 Insulin resistance; ko04910 Insulin signaling pathway;
CL11884Contig1_orf1	diacylglycerol O-acyl transferase	61.582	1.00133	0.96683	0.943196	0.943478	0.919834	0.860672	1.16617	1.18973	1.08945	1.11013	1.01124	0.986042	plasma membrane	neutral lipid metabolic process; glycerolipid metabolic process; single-organism biosynthetic process; single-organism cellular process; single-organism process; biosynthetic process; acylglycerol biosynthetic process; cellular lipid metabolic process; primary metabolic process; cellular metabolic process; organic substance biosynthetic process; triglyceride biosynthetic process; cellular biosynt…		transferase activity, transferring acyl groups; diacylglycerol O-acyltransferase activity; catalytic activity; transferase activity; transferase activity, transferring acyl groups other than amino-acyl groups; acylglycerol O-acyltransferase activity; O-acyltransferase activity;	K11155	DGAT1; diacylglycerol O-acyltransferase 1 [EC:2.3.1.20 2.3.1.75 2.3.1.76]	ko00830 Retinol metabolism; ko04975 Fat digestion and absorption; ko00561 Glycerolipid metabolism; ko01100 Metabolic pathways;
CL11886Contig1_orf1	hypothetical protein BRAFLDRAFT_122807	75.304	0.982867	1.00184	0.600063	0.590066	1.17257	1.17199	0.949839	0.946857	1.16126	1.18139	1.22249	1.22587	cytosol	regulation of cellular process; homeostatic process; regulation of biological quality; metabolic process; regulation of biological process; oxidation-reduction process; single-organism metabolic process; cell redox homeostasis; single-organism cellular process; cellular homeostasis; single-organism process; cellular process; biological regulation;		protein disulfide oxidoreductase activity; oxidoreductase activity, acting on NAD(P)H; nucleoside phosphate binding; flavin adenine dinucleotide binding; thioredoxin-disulfide reductase activity; ion binding; antioxidant activity; nucleotide binding; oxidoreductase activity, acting on a sulfur group of donors, NAD(P) as acceptor; cofactor binding; oxidoreductase activity; disulfide oxidoreductase…	K00384	trxB; thioredoxin reductase (NADPH) [EC:1.8.1.9]	ko00240 Pyrimidine metabolism; ko00450 Selenocompound metabolism;	IPR016156; IPR002109; IPR011899; IPR004099; IPR012336; IPR023753;	FAD/NAD-linked reductase, dimerisation domain; Glutaredoxin; Glutaredoxin, eukaryotic/virial; Pyridine nucleotide-disulphide oxidoreductase, dimerisation domain; Thioredoxin-like fold; FAD/NAD(P)-binding domain;
CL11890Contig1_orf1	heat shock protein 40	44.883	0.842931		1.27033		1.79935		0.438334		0.669134		0.460539		cytosol	protein folding; metabolic process; response to stress; response to heat; response to abiotic stimulus; response to temperature stimulus; cellular protein metabolic process; cellular macromolecule metabolic process; macromolecule metabolic process; protein metabolic process; response to stimulus; primary metabolic process; cellular process; cellular metabolic process; organic substance metabolic …		ATP binding; heat shock protein binding; nucleoside phosphate binding; nucleoside binding; ion binding; protein binding; nucleotide binding; organic cyclic compound binding; heterocyclic compound binding; ribonucleoside binding; carbohydrate derivative binding; ribonucleotide binding; binding; purine ribonucleoside binding; anion binding; purine ribonucleotide binding; unfolded protein binding; a…	K09502	DNAJA1; DnaJ homolog subfamily A member 1	ko04141 Protein processing in endoplasmic reticulum;	IPR008971; IPR002939; IPR001623; IPR001305;	HSP40/DnaJ peptide-binding; Chaperone DnaJ, C-terminal; DnaJ domain; Heat shock protein DnaJ, cysteine-rich domain;
CL11898Contig1_orf1	hypothetical protein TcasGA2_TC015765	12.732	0.902127		1.17628		1.27663		0.613391		0.991679		0.709025		nuclear	single-organism cellular process; single-organism process; microtubule-based process; cellular process;	intracellular organelle; intracellular non-membrane-bounded organelle; cytoskeletal part; intracellular organelle part; macromolecular complex; intracellular part; dynein complex; microtubule associated complex; cell; organelle part; non-membrane-bounded organelle; organelle; cytoskeleton; catalytic complex; microtubule cytoskeleton; cell part; intracellular; protein complex;		K10418	DYNLL; dynein light chain LC8-type	ko04962 Vasopressin-regulated water reabsorption;
CL1190Contig6_orf1	conserved hypothetical protein	38.7	1.11324	1.09778	0.743205	0.753235	0.967587	1.00643	1.17967	1.07268	0.980845	0.99926	1.15783	1.11	plasma membrane
CL11922Contig1_orf1	probable pyruvate dehydrogenase E1 component subunit alpha, mitochondrial	47.03	0.722985	0.847448	0.83955	1.03444	1.51442	1.51848	0.819901	0.644349	0.947335	0.89209	1.11939	0.976236	mitochondria	cofactor biosynthetic process; single-organism process; biosynthetic process; cellular metabolic process; thioester biosynthetic process; sulfur compound biosynthetic process; organic substance metabolic process; acetyl-CoA biosynthetic process; pyruvate metabolic process; metabolic process; monocarboxylic acid metabolic process; coenzyme biosynthetic process; cellular process; sulfur compound me…	intracellular membrane-bounded organelle; organelle; intracellular organelle; cell part; intracellular; intracellular part; membrane-bounded organelle; cell;	pyruvate dehydrogenase activity; pyruvate dehydrogenase (acetyl-transferring) activity; catalytic activity; oxidoreductase activity, acting on the aldehyde or oxo group of donors, disulfide as acceptor; oxidoreductase activity; oxidoreductase activity, acting on the aldehyde or oxo group of donors;	K00161	PDHA; pyruvate dehydrogenase E1 component alpha subunit [EC:1.2.4.1]	ko01130 Biosynthesis of antibiotics; ko01110 Biosynthesis of secondary metabolites; ko01100 Metabolic pathways; ko00020 Citrate cycle (TCA cycle); ko01120 Microbial metabolism in diverse environments; ko01200 Carbon metabolism; ko00010 Glycolysis / Gluconeogenesis; ko04922 Glucagon signaling pathway; ko05230 Central carbon metabolism in cancer; ko04066 HIF-1 signaling pathway; ko00620 Pyruvate me…	IPR029061; IPR001017;	Thiamin diphosphate-binding fold; Dehydrogenase, E1 component;
CL11935Contig1_orf1	hypothetical protein DAPPUDRAFT_218498	59.026		0.841233		1.05471		1.515		0.574939		0.87529		0.742419	cytosol	cellular aromatic compound metabolic process; nucleotide metabolic process; small molecule metabolic process; single-organism cellular process; nitrogen compound metabolic process; single-organism process; organic cyclic compound metabolic process; primary metabolic process; cellular metabolic process; phosphate-containing compound metabolic process; organic substance metabolic process; metabolic…		nucleotidyltransferase activity; UTP:glucose-1-phosphate uridylyltransferase activity; catalytic activity; UTP-monosaccharide-1-phosphate uridylyltransferase activity; transferase activity; uridylyltransferase activity; transferase activity, transferring phosphorus-containing groups;	K00963	UGP2; UTP--glucose-1-phosphate uridylyltransferase [EC:2.7.7.9]	ko01130 Biosynthesis of antibiotics; ko00500 Starch and sucrose metabolism; ko00052 Galactose metabolism; ko01100 Metabolic pathways; ko00040 Pentose and glucuronate interconversions; ko00520 Amino sugar and nucleotide sugar metabolism;	IPR029044;	Nucleotide-diphospho-sugar transferases;
CL11936Contig1_orf1	hypothetical protein CAPTEDRAFT_152090	42.541	0.80857		1.04105		0.850975		1.31715		0.911346		1.15265		mitochondria			catalytic activity;	K01796	E5.1.99.4; alpha-methylacyl-CoA racemase [EC:5.1.99.4]	ko04146 Peroxisome; ko01100 Metabolic pathways; ko00120 Primary bile acid biosynthesis;	IPR023606;	CoA-transferase family III domain;
CL11942Contig1_orf1	proteasome subunit beta type-7-like	32.902	0.827803	0.805025	1.31584	1.27477	1.30786	1.372	0.677345	0.678279	0.729766	0.650157	0.842884	0.810988	cytosol	proteolysis involved in cellular protein catabolic process; cellular macromolecule catabolic process; cellular protein catabolic process; cellular protein metabolic process; primary metabolic process; cellular metabolic process; organic substance metabolic process; organic substance catabolic process; metabolic process; protein catabolic process; macromolecule catabolic process; cellular macromol…	proteasome complex; cell part; intracellular; proteasome core complex; macromolecular complex; intracellular part; protein complex; cell;	endopeptidase activity; threonine-type endopeptidase activity; peptidase activity; threonine-type peptidase activity; catalytic activity; peptidase activity, acting on L-amino acid peptides; hydrolase activity;	K02739	PSMB7; 20S proteasome subunit beta 2 [EC:3.4.25.1]	ko03050 Proteasome;	IPR024689; IPR029055;	Proteasome beta subunit, C-terminal; Nucleophile aminohydrolases, N-terminal;
CL11953Contig1_orf1	destabilase I	16.67	0.688434	0.802401	0.412652	0.483778	0.800494	0.842393	1.09473	1.19884	2.16787	1.99719	1.27322	1.12896	extracellular			lysozyme activity; hydrolase activity, hydrolyzing O-glycosyl compounds; hydrolase activity; catalytic activity; hydrolase activity, acting on glycosyl bonds;				IPR023346;	Lysozyme-like domain;
CL11956Contig1_orf1	uncharacterized protein LOC105221107 isoform X2	14.759	0.96155	0.888277	0.95225	1.18727	1.07383	1.18574	1.10132	0.923721	0.954008	0.766809	0.957419	0.82933	plasma membrane	transport; localization; vesicle-mediated transport; establishment of localization;	intrinsic component of membrane; membrane; integral component of membrane; membrane part;		K13504	VAMP2; vesicle-associated membrane protein 2	ko04911 Insulin secretion; ko04721 Synaptic vesicle cycle; ko04970 Salivary secretion; ko04962 Vasopressin-regulated water reabsorption; ko04130 SNARE interactions in vesicular transport;	IPR001388;	Synaptobrevin;
CL11961Contig1_orf1	cathepsin B	38.006	0.786902	0.729453	1.12944	1.22389	0.941875	1.0555	0.971868	0.832461	1.03244	0.942918	1.11509	0.931614	extracellular	metabolic process; regulation of biological process; regulation of catalytic activity; regulation of molecular function; regulation of metabolic process; proteolysis; protein metabolic process; macromolecule metabolic process; primary metabolic process; biological regulation; organic substance metabolic process;		endopeptidase activity; peptidase activity, acting on L-amino acid peptides; cysteine-type peptidase activity; hydrolase activity; peptidase activity; cysteine-type endopeptidase activity; catalytic activity;	K01363	CTSB; cathepsin B [EC:3.4.22.1]	ko04621 NOD-like receptor signaling pathway; ko04612 Antigen processing and presentation; ko04142 Lysosome; ko04924 Renin secretion; ko04210 Apoptosis;	IPR000668; IPR012599;	Peptidase C1A, papain C-terminal; Peptidase C1A, propeptide;
CL11962Contig1_orf1	protaglandin reductase 1	37.789	1.05394	1.09647	1.21167	0.993603	0.813873	0.80598	0.937859	0.920902	1.09014	1.50979	0.776275	0.628114	mitochondria	single-organism process; metabolic process; oxidation-reduction process; single-organism metabolic process;		catalytic activity; oxidoreductase activity;	K13948			IPR011032; IPR020843; IPR016040; IPR013149;	GroES-like; Polyketide synthase, enoylreductase domain; NAD(P)-binding domain; Alcohol dehydrogenase, C-terminal;
CL11963Contig1_orf1	proteasome subunit beta type-6	25.571	0.755792	0.695608	1.03576	0.964262	1.15717	1.23314	0.74372	0.721184	1.43152	1.36843	0.859962	0.898477	cytosol, nuclear	proteolysis involved in cellular protein catabolic process; cellular macromolecule catabolic process; cellular protein catabolic process; cellular protein metabolic process; primary metabolic process; cellular metabolic process; organic substance metabolic process; organic substance catabolic process; metabolic process; protein catabolic process; macromolecule catabolic process; cellular macromol…	proteasome complex; cell part; intracellular; proteasome core complex; macromolecular complex; intracellular part; protein complex; cell;	endopeptidase activity; threonine-type endopeptidase activity; peptidase activity; threonine-type peptidase activity; catalytic activity; peptidase activity, acting on L-amino acid peptides; hydrolase activity;	K02738	PSMB6; 20S proteasome subunit beta 1 [EC:3.4.25.1]	ko03050 Proteasome;	IPR029055;	Nucleophile aminohydrolases, N-terminal;
CL11967Contig1_orf1	C-type lectin	33.752	1.21866	1.18397	0.754896	0.751977	0.940969	0.978989	1.3455	1.34056	0.945728	0.968054	0.935095	0.950966	extracellular							IPR001304; IPR016187; IPR016186;	C-type lectin-like; C-type lectin fold; C-type lectin-like/link domain;
CL11978Contig1_orf1	hypothetical protein DAPPUDRAFT_230075	23.233	0.728461	0.572628	0.966634	0.984966	0.79107	0.728383	1.14833	1.17244	1.34548	1.46451	1.16237	1.16348	extracellular			pigment binding; binding;	K03098			IPR012674; IPR000566; IPR011038;	Calycin; Lipocalin/cytosolic fatty-acid binding domain; Calycin-like;
CL11981Contig1_orf1A	Chain A, Crystallographic Structure Of Thioredoxin From Litopenaeus Vannamei&gt	14.049	0.509147	0.479129	1.11013	1.08268	1.9866	2.0205	0.564609	0.576101	0.60946	0.53987	0.771755	0.638795	extracellular	regulation of cellular process; regulation of biological quality; cell redox homeostasis; small molecule metabolic process; single-organism cellular process; cellular homeostasis; ether metabolic process; single-organism process; organic substance metabolic process; homeostatic process; metabolic process; regulation of biological process; single-organism metabolic process; glycerol ether metaboli…		protein disulfide oxidoreductase activity; oxidoreductase activity, acting on a sulfur group of donors; disulfide oxidoreductase activity; catalytic activity; oxidoreductase activity;	K03671	trxA; thioredoxin 1	ko04621 NOD-like receptor signaling pathway;	IPR012336; IPR013766;	Thioredoxin-like fold; Thioredoxin domain;
CL11985Contig1_orf1	acetyl-CoA carboxylase, putative	258.08	0.90662	0.961039	1.29595	0.958045	0.973311	0.884051	0.899495	1.07162	0.924838	0.996112	0.870921	1.24358	mitochondria	single-organism biosynthetic process; organic acid biosynthetic process; small molecule metabolic process; single-organism cellular process; single-organism process; biosynthetic process; cellular lipid metabolic process; fatty acid metabolic process; primary metabolic process; cellular metabolic process; fatty acid biosynthetic process; organic substance biosynthetic process; cellular biosynthet…		ATP binding; nucleoside phosphate binding; ligase activity, forming carbon-carbon bonds; nucleoside binding; ion binding; ligase activity; nucleotide binding; heterocyclic compound binding; acetyl-CoA carboxylase activity; ligase activity, forming carbon-nitrogen bonds; organic cyclic compound binding; ribonucleoside binding; biotin carboxylase activity; carbohydrate derivative binding; CoA carbo…	K11262	ACACA; acetyl-CoA carboxylase / biotin carboxylase 1 [EC:6.4.1.2 6.3.4.14]	ko01110 Biosynthesis of secondary metabolites; ko01100 Metabolic pathways; ko00254 Aflatoxin biosynthesis; ko00061 Fatty acid biosynthesis; ko04922 Glucagon signaling pathway; ko01212 Fatty acid metabolism; ko04152 AMPK signaling pathway; ko00620 Pyruvate metabolism; ko04910 Insulin signaling pathway; ko00640 Propanoate metabolism;	IPR011762; IPR000022; IPR029045; IPR011053; IPR005481; IPR000089; IPR005479; IPR013815; IPR013537; IPR016185; IPR011764; IPR011761; IPR005482; IPR013816; IPR011763; IPR011054;	Acetyl-coenzyme A carboxyltransferase, N-terminal; Carboxyl transferase; ClpP/crotonase-like domain; Single hybrid motif; Biotin carboxylase-like, N-terminal domain; Biotin/lipoyl attachment; Carbamoyl-phosphate synthetase large subunit-like, ATP-binding domain; ATP-grasp fold, subdomain 1; Acetyl-CoA carboxylase, central domain; Pre-ATP-grasp domain; Biotin carboxylation domain; ATP-grasp fold; …
CL11990Contig1_orf1	endoplasmic reticulum resident protein 44 isoform X3	48.806	0.980398	0.943083	1.49799	1.40824	1.17056	1.12538	0.708953	0.752975	0.651104	0.647331	0.622032	0.731587	cytosol	regulation of cellular process; homeostatic process; regulation of biological quality; regulation of biological process; cell redox homeostasis; single-organism cellular process; cellular homeostasis; single-organism process; cellular process; biological regulation;			K17264			IPR013766; IPR012336;	Thioredoxin domain; Thioredoxin-like fold;
CL11993Contig1_orf1	T-complex protein subunit theta	60.365	0.92006	0.797081	1.24604	1.11948	1.41949	1.35586	0.752584	0.743719	0.709757	0.684251	0.731227	0.745249	cytosol	protein folding; metabolic process; cellular protein metabolic process; cellular macromolecule metabolic process; macromolecule metabolic process; protein metabolic process; primary metabolic process; cellular process; cellular metabolic process; organic substance metabolic process;		ATP binding; nucleoside phosphate binding; nucleoside binding; ion binding; protein binding; nucleotide binding; organic cyclic compound binding; heterocyclic compound binding; ribonucleoside binding; carbohydrate derivative binding; ribonucleotide binding; binding; purine ribonucleoside binding; anion binding; purine ribonucleotide binding; unfolded protein binding; adenyl ribonucleotide binding…	K09500			IPR027409; IPR027413;	GroEL-like apical domain; GroEL-like equatorial domain;
CL11999Contig1_orf1	hypothetical protein DAPPUDRAFT_57769	36.198	0.837168	0.866984	1.22427	1.22486	1.80942	1.50387	0.455604	0.513957	0.60298	0.77258	0.5453	0.66568	extracellular	oxidation-reduction process; small molecule metabolic process; single-organism cellular process; single-organism process; cellular lipid metabolic process; fatty acid metabolic process; primary metabolic process; cellular metabolic process; organic substance metabolic process; metabolic process; single-organism metabolic process; carboxylic acid metabolic process; monocarboxylic acid metabolic pr…		nucleoside phosphate binding; ion binding; NAD+ binding; nucleotide binding; cofactor binding; oxidoreductase activity; heterocyclic compound binding; organic cyclic compound binding; oxidoreductase activity, acting on CH-OH group of donors; oxidoreductase activity, acting on the CH-OH group of donors, NAD or NADP as acceptor; NAD binding; catalytic activity; binding; anion binding; 3-hydroxyacyl…	K00022	HADH; 3-hydroxyacyl-CoA dehydrogenase [EC:1.1.1.35]	ko00930 Caprolactam degradation; ko00310 Lysine degradation; ko01130 Biosynthesis of antibiotics; ko00071 Fatty acid degradation; ko01110 Biosynthesis of secondary metabolites; ko01100 Metabolic pathways; ko00062 Fatty acid elongation; ko00380 Tryptophan metabolism; ko00280 Valine, leucine and isoleucine degradation; ko01120 Microbial metabolism in diverse environments; ko00281 Geraniol degradati…	IPR008927; IPR013328; IPR016040; IPR006176; IPR006108;	6-phosphogluconate dehydrogenase C-terminal domain-like; 6-phosphogluconate dehydrogenase, domain 2; NAD(P)-binding domain; 3-hydroxyacyl-CoA dehydrogenase, NAD binding; 3-hydroxyacyl-CoA dehydrogenase, C-terminal;
CL1199Contig3_orf1	L-type lectin	38.338	0.953968	0.986521	0.975098	0.942065	0.878055	0.860095	0.989707	0.967465	1.14481	1.15281	1.094	1.1127	plasma membrane		membrane;		K10082	LMAN2; lectin, mannose-binding 2	ko04141 Protein processing in endoplasmic reticulum;	IPR005052; IPR013320;	Legume-like lectin; Concanavalin A-like lectin/glucanase domain;
CL11Contig6_orf1	tRNA-dihydrouridine(16/17) synthase	61.702													cytosol	ncRNA processing; cellular aromatic compound metabolic process; oxidation-reduction process; nitrogen compound metabolic process; single-organism process; organic cyclic compound metabolic process; primary metabolic process; cellular metabolic process; organic substance metabolic process; RNA metabolic process; metabolic process; tRNA metabolic process; nucleic acid metabolic process; heterocycle…		nucleoside phosphate binding; flavin adenine dinucleotide binding; ion binding; nucleotide binding; cofactor binding; oxidoreductase activity; oxidoreductase activity, acting on the CH-CH group of donors; heterocyclic compound binding; organic cyclic compound binding; catalytic activity; binding; tRNA dihydrouridine synthase activity; anion binding; coenzyme binding; small molecule binding;	K05542			IPR013785;	Aldolase-type TIM barrel;
CL12000Contig1_orf1	aromatic-L-amino-acid decarboxylase	54.634	0.688598	0.817681	0.928374	0.908717	0.963109	0.913468	0.765909	0.900233	1.3402	1.25097	1.39903	1.4017	cytosol	small molecule metabolic process; single-organism cellular process; nitrogen compound metabolic process; single-organism process; primary metabolic process; cellular metabolic process; organic substance metabolic process; metabolic process; cellular amino acid metabolic process; single-organism metabolic process; carboxylic acid metabolic process; organic acid metabolic process; cellular process;…		organic cyclic compound binding; heterocyclic compound binding; catalytic activity; binding; carbon-carbon lyase activity; ion binding; carboxy-lyase activity; lyase activity; anion binding; cofactor binding; pyridoxal phosphate binding;	K01593	DDC; aromatic-L-amino-acid decarboxylase [EC:4.1.1.28]	ko00901 Indole alkaloid biosynthesis; ko04726 Serotonergic synapse; ko05034 Alcoholism; ko01110 Biosynthesis of secondary metabolites; ko05031 Amphetamine addiction; ko01100 Metabolic pathways; ko00350 Tyrosine metabolism; ko00360 Phenylalanine metabolism; ko00950 Isoquinoline alkaloid biosynthesis; ko00965 Betalain biosynthesis; ko00380 Tryptophan metabolism; ko05030 Cocaine addiction; ko04728 D…	IPR015424; IPR015422; IPR015421;	Pyridoxal phosphate-dependent transferase; Pyridoxal phosphate-dependent transferase, major region, subdomain 2; Pyridoxal phosphate-dependent transferase, major region, subdomain 1;
CL12006Contig2_orf1	carboxypeptidase B	48.266	0.968419	0.974347	0.669988	0.635065	0.7767	0.766519	1.3595	1.38764	1.20963	1.28325	1.2603	1.25863	extracellular	proteolysis; metabolic process; macromolecule metabolic process; protein metabolic process; primary metabolic process; organic substance metabolic process;		carboxypeptidase activity; peptidase activity; exopeptidase activity; metalloexopeptidase activity; ion binding; metallopeptidase activity; hydrolase activity; zinc ion binding; transition metal ion binding; metallocarboxypeptidase activity; catalytic activity; binding; metal ion binding; peptidase activity, acting on L-amino acid peptides; cation binding;				IPR003146; IPR000834; IPR009020;	Carboxypeptidase, activation peptide; Peptidase M14, carboxypeptidase A; Proteinase propeptide inhibitor;
CL12017Contig1_orf1	mitochondrial-processing peptidase subunit beta	54.584	0.821435	0.768598	1.37677	1.29028	1.08374	1.16134	0.722891	0.757075	0.793331	0.641465	0.705441	0.609942	mitochondria	proteolysis; metabolic process; macromolecule metabolic process; protein metabolic process; primary metabolic process; organic substance metabolic process;		endopeptidase activity; metalloendopeptidase activity; peptidase activity; catalytic activity; binding; ion binding; peptidase activity, acting on L-amino acid peptides; cation binding; metal ion binding; metallopeptidase activity; hydrolase activity;	K17732			IPR007863; IPR011765; IPR011249; IPR011237;	Peptidase M16, C-terminal; Peptidase M16, N-terminal; Metalloenzyme, LuxS/M16 peptidase-like; Peptidase M16 domain;
CL1201Contig1_orf1	hypothetical protein TcasGA2_TC014040	43.419	1.0424	1.03298	0.89861	0.828228	1.30044	1.18044	0.946558	1.01493	1.03208	0.957602	0.694397	0.962389	nuclear			cation binding; metal ion binding; calcium ion binding; binding; ion binding;				IPR011992; IPR002048;	EF-hand domain pair; EF-hand domain;
CL12074Contig1_orf1	hypothetical protein DAPPUDRAFT_305325	48.662	0.776149	0.739805	1.16368	1.23037	1.37735	1.35338	0.681775	0.716786	0.919144	0.864313	0.873521	0.818114	cytosol			protein binding; binding;				IPR000483; IPR032675;	Cysteine-rich flanking region, C-terminal; Leucine-rich repeat domain, L domain-like;
CL1212Contig3_orf1	sodium-calcium exchanger 1 isoform 1	92.766	0.790976		0.939987		0.993174		0.984589		1.0822		1.05345		plasma membrane	divalent inorganic cation transport; metal ion transport; single-organism cellular process; single-organism process; establishment of localization; transport; transmembrane transport; single-organism localization; cell communication; cation transport; calcium ion transport; ion transport; localization; cellular process; divalent metal ion transport; single-organism transport;	intrinsic component of membrane; membrane; integral component of membrane; membrane part;	solute:cation antiporter activity; active transmembrane transporter activity; secondary active transmembrane transporter activity; ion transmembrane transporter activity; substrate-specific transporter activity; monovalent inorganic cation transmembrane transporter activity; antiporter activity; substrate-specific transmembrane transporter activity; calcium:sodium antiporter activity; metal ion t…	K05849	SLC8A; solute carrier family 8 (sodium/calcium exchanger)	ko04022 cGMP-PKG signaling pathway; ko04020 Calcium signaling pathway; ko04740 Olfactory transduction; ko04974 Protein digestion and absorption;	IPR003644; IPR004837; IPR032452;	Na-Ca exchanger/integrin-beta4; Sodium/calcium exchanger membrane region; Sodium/calcium exchanger domain, C-terminal extension;
CL121Contig2_orf1	alpha2 macroglobulin isoform 2	164.63	0.952682	0.913917	1.20231	1.24771	1.0725	1.03789	0.879424	0.863319	0.89229	0.879626	0.867322	0.824537	mitochondria		extracellular space; extracellular region part; extracellular region;	enzyme regulator activity; peptidase inhibitor activity; peptidase regulator activity; endopeptidase regulator activity; molecular function regulator; enzyme inhibitor activity; endopeptidase inhibitor activity;	K03910	A2M; alpha-2-macroglobulin	ko04610 Complement and coagulation cascades;	IPR002890; IPR011625; IPR009048; IPR014756; IPR001599; IPR008930; IPR019565; IPR011626;	Alpha-2-macroglobulin, N-terminal; Alpha-2-macroglobulin, N-terminal 2; Alpha-macroglobulin, receptor-binding; Immunoglobulin E-set; Alpha-2-macroglobulin; Terpenoid cyclases/protein prenyltransferase alpha-alpha toroid; Alpha-2-macroglobulin, thiol-ester bond-forming; Alpha-macroglobulin complement component;
CL12205Contig1_orf1	hypothetical protein L798_09565, partial	89.858		1.01002		1.04922		1.0534		1.00213		1.02637		0.795382	peroxisome		intrinsic component of membrane; membrane; integral component of membrane; membrane part;					IPR012315;	KASH domain;
CL1229Contig5_orf1	uncharacterized protein LOC105151848 isoform X2	16.331													extracellular	acid secretion; single-organism process; arachidonic acid secretion; cellular lipid metabolic process; cellular metabolic process; phosphate-containing compound metabolic process; organic substance metabolic process; establishment of localization; icosanoid secretion; metabolic process; fatty acid transport; single-organism localization; monocarboxylic acid transport; macromolecule localization; …		carboxylic ester hydrolase activity; catalytic activity; phospholipase A2 activity; hydrolase activity, acting on ester bonds; phospholipase activity; hydrolase activity; lipase activity;	K01047	PLA2G; secretory phospholipase A2 [EC:3.1.1.4]	ko00592 alpha-Linolenic acid metabolism; ko04975 Fat digestion and absorption; ko00565 Ether lipid metabolism; ko01110 Biosynthesis of secondary metabolites; ko01100 Metabolic pathways; ko00564 Glycerophospholipid metabolism; ko04270 Vascular smooth muscle contraction; ko00590 Arachidonic acid metabolism; ko04972 Pancreatic secretion; ko00591 Linoleic acid metabolism; ko04014 Ras signaling pathwa…	IPR016090;	Phospholipase A2 domain;
CL1231Contig1_orf1	nucleoporin SEH1 isoform X2	42.915	0.985147	0.896729	1.41945	1.67488	1.30095	1.46046	0.676801	0.328203	0.62343	0.464138	0.630002	0.4222	mitochondria			protein binding; binding;	K14299	SEH1; nucleoporin SEH1	ko04150 mTOR signaling pathway; ko03013 RNA transport;	IPR017986; IPR015943;	WD40-repeat-containing domain; WD40/YVTN repeat-like-containing domain;
CL1237Contig2_orf1	zinc finger protein 271-like isoform X1	84.281													nuclear			organic cyclic compound binding; heterocyclic compound binding; binding; nucleic acid binding; ion binding; cation binding; metal ion binding;	K09228			IPR015880; IPR007087; IPR013087;	Zinc finger, C2H2-like; Zinc finger, C2H2; Zinc finger C2H2-type/integrase DNA-binding domain;
CL12480Contig1_orf1	6-pyruvoyl tetrahydrobiopterin synthase	17.461	1.15828	1.18175	0.782773	0.79585	0.672495	0.643674	1.28822	1.17541	1.05686	1.07687	1.30097	1.33509	mitochondria	cofactor biosynthetic process; pteridine-containing compound biosynthetic process; heterocycle biosynthetic process; cellular aromatic compound metabolic process; nitrogen compound metabolic process; organic cyclic compound metabolic process; biosynthetic process; coenzyme metabolic process; organonitrogen compound biosynthetic process; cellular metabolic process; organic substance biosynthetic p…		lyase activity; 6-pyruvoyltetrahydropterin synthase activity; carbon-oxygen lyase activity, acting on phosphates; catalytic activity; carbon-oxygen lyase activity;	K01737	queD; 6-pyruvoyltetrahydropterin/6-carboxytetrahydropterin synthase [EC:4.2.3.12 4.1.2.50]	ko00790 Folate biosynthesis; ko01100 Metabolic pathways;
CL12509Contig1_orf1	RNA-binding protein squid-like isoform X3	29.411													nuclear			organic cyclic compound binding; heterocyclic compound binding; nucleoside phosphate binding; binding; nucleic acid binding; nucleotide binding; small molecule binding;	K03102	SQD; squid	ko04320 Dorso-ventral axis formation;	IPR000504; IPR012677;	RNA recognition motif domain; Nucleotide-binding alpha-beta plait domain;
CL1259Contig1_orf1	hypothetical protein DAPPUDRAFT_330720	89.804	1.08367	1.30305	0.78334	0.586841	0.851762	0.831026	1.18341	1.28856	0.996911	0.997091	1.19236	1.29438	extracellular	metabolic process; peptide metabolic process; oxidation-reduction process; single-organism metabolic process; single-organism process; nitrogen compound metabolic process; cellular nitrogen compound metabolic process; cellular amide metabolic process; cellular metabolic process; cellular process; organic substance metabolic process; organonitrogen compound metabolic process;	membrane;	transition metal ion binding; catalytic activity; binding; ion binding; oxidoreductase activity, acting on paired donors, with incorporation or reduction of molecular oxygen; metal ion binding; cation binding; protein binding; copper ion binding; monooxygenase activity; oxidoreductase activity, acting on paired donors, with incorporation or reduction of molecular oxygen, reduced ascorbate as one …	K18200			IPR008977; IPR014784; IPR000323; IPR024548; IPR011042;	PHM/PNGase F domain; Copper type II, ascorbate-dependent monooxygenase-like, C-terminal; Copper type II, ascorbate-dependent monooxygenase, N-terminal; Copper type II ascorbate-dependent monooxygenase, C-terminal; Six-bladed beta-propeller, TolB-like;
CL12669Contig1_orf1	AAEL014702-PA	67.422	0.866953	0.987134	1.36848	1.31794	1.32364	1.26506	0.666026	0.55476	0.615161	0.634781	0.689134	0.603476	nuclear	cellular aromatic compound metabolic process; cellular protein metabolic process; single-organism process; biosynthetic process; tRNA aminoacylation; cellular metabolic process; organic substance metabolic process; metabolic process; cellular amino acid metabolic process; heterocycle metabolic process; nucleobase-containing compound metabolic process; cellular nitrogen compound metabolic process;…	intracellular part; cell; cell part; intracellular; cytoplasm;	ligase activity, forming aminoacyl-tRNA and related compounds; ATP binding; nucleoside phosphate binding; ligase activity, forming carbon-oxygen bonds; ligase activity; nucleoside binding; ion binding; nucleotide binding; lysine-tRNA ligase activity; organic cyclic compound binding; heterocyclic compound binding; ribonucleoside binding; carbohydrate derivative binding; catalytic activity; ribonuc…	K04567	KARS; lysyl-tRNA synthetase, class II [EC:6.1.1.6]	ko00970 Aminoacyl-tRNA biosynthesis;	IPR004364; IPR012340; IPR004365; IPR018149; IPR006195;	Aminoacyl-tRNA synthetase, class II (D/K/N); Nucleic acid-binding, OB-fold; OB-fold nucleic acid binding domain, AA-tRNA synthetase-type; Lysyl-tRNA synthetase, class II, C-terminal; Aminoacyl-tRNA synthetase, class II;
CL12696Contig1_orf1	40S ribosomal protein S28	8.5808	0.972861	0.944478	1.12725	1.58682	1.25871	1.22095	0.701673	0.507652	0.589415	0.540302	0.928814	0.560461	cytosol	cellular protein metabolic process; biosynthetic process; primary metabolic process; cellular metabolic process; organic substance biosynthetic process; cellular biosynthetic process; organic substance metabolic process; metabolic process; cellular macromolecule biosynthetic process; cellular macromolecule metabolic process; gene expression; macromolecule metabolic process; protein metabolic proc…	ribosome; organelle; intracellular organelle; intracellular non-membrane-bounded organelle; cell part; intracellular; cytoplasm; macromolecular complex; intracellular part; cell; ribonucleoprotein complex; cytoplasmic part; non-membrane-bounded organelle;	structural constituent of ribosome; structural molecule activity;	K02979	RP-S28e; small subunit ribosomal protein S28e	ko03010 Ribosome;	IPR012340;	Nucleic acid-binding, OB-fold;
CL12788Contig1_orf1	hypothetical protein CAPTEDRAFT_151507	16.611	1.19913	1.18808	1.41468	1.3655	0.893476	0.903862	0.951286	0.896833	0.366047	0.53685	0.989993	0.920298	nuclear							IPR005175;	PPC domain;
CL1281Contig1_orf1	calcineurin subunit B	19.981	1.2749	1.22984	1.0102	1.04046	0.909633	0.981026	1.13429	1.03313	0.866664	0.828446	0.828557	0.844118	cytosol			cation binding; metal ion binding; calcium ion binding; binding; ion binding;	K06268	PPP3R; serine/threonine-protein phosphatase 2B regulatory subunit	ko04650 Natural killer cell mediated cytotoxicity; ko04370 VEGF signaling pathway; ko04020 Calcium signaling pathway; ko04380 Osteoclast differentiation; ko04724 Glutamatergic synapse; ko04114 Oocyte meiosis; ko05010 Alzheimer's disease; ko04921 Oxytocin signaling pathway; ko04360 Axon guidance; ko04922 Glucagon signaling pathway; ko04720 Long-term potentiation; ko04660 T cell receptor signaling …	IPR011992; IPR002048;	EF-hand domain pair; EF-hand domain;
CL12821Contig1_orf1	succinate dehydrogenase	72.806	1.04005	1.10206	1.05777	1.15419	1.09658	1.09351	0.889145	0.860792	1.05004	0.748542	0.79048	0.857973	mitochondria	tricarboxylic acid metabolic process; oxidation-reduction process; small molecule metabolic process; single-organism cellular process; tricarboxylic acid cycle; single-organism process; primary metabolic process; cellular respiration; cellular metabolic process; organic substance metabolic process; citrate metabolic process; metabolic process; generation of precursor metabolites and energy; aerob…		organic cyclic compound binding; heterocyclic compound binding; oxidoreductase activity, acting on the CH-CH group of donors; nucleoside phosphate binding; flavin adenine dinucleotide binding; catalytic activity; binding; ion binding; anion binding; nucleotide binding; cofactor binding; small molecule binding; coenzyme binding; oxidoreductase activity;	K00234	SDHA; succinate dehydrogenase (ubiquinone) flavoprotein subunit [EC:1.3.5.1]	ko01130 Biosynthesis of antibiotics; ko01110 Biosynthesis of secondary metabolites; ko01100 Metabolic pathways; ko04932 Non-alcoholic fatty liver disease (NAFLD); ko00020 Citrate cycle (TCA cycle); ko01120 Microbial metabolism in diverse environments; ko05010 Alzheimer's disease; ko01200 Carbon metabolism; ko00190 Oxidative phosphorylation; ko05016 Huntington's disease; ko05012 Parkinson's diseas…	IPR027477; IPR003953; IPR015939; IPR023753;	Succinate dehydrogenase/fumarate reductase flavoprotein, catalytic domain; FAD-dependent oxidoreductase 2, FAD binding domain; Fumarate reductase/succinate dehydrogenase flavoprotein-like, C-terminal; FAD/NAD(P)-binding domain;
CL12822Contig1_orf1	Laminin subunit beta-1	44.264	0.824163	0.815403	1.35596	1.20485	1.08191	1.04291	0.877492	0.916861	0.767762	0.895254	0.889924	0.990646	extracellular			protein binding; binding;	K05636	LAMB1; laminin, beta 1	ko05145 Toxoplasmosis; ko04512 ECM-receptor interaction; ko04510 Focal adhesion; ko05200 Pathways in cancer; ko05222 Small cell lung cancer; ko05146 Amoebiasis; ko04151 PI3K-Akt signaling pathway;	IPR013015; IPR002049; IPR000742;	Laminin IV type B; Laminin EGF domain; EGF-like domain;
CL12824Contig1_orf1	putative integument esterase	64.102													extracellular							IPR029058; IPR002018;	Alpha/Beta hydrolase fold; Carboxylesterase, type B;
CL12835Contig1_orf1	elongation of very long chain fatty acids protein 6, partial	41.671	0.787543	0.879735	0.735897	0.694012	1.16563	1.03143	0.847363	0.970587	1.33099	1.25067	1.21639	1.30095	cytosol		intrinsic component of membrane; membrane; integral component of membrane; membrane part;		K10203	ELOVL6; elongation of very long chain fatty acids protein 6 [EC:2.3.1.199]	ko01110 Biosynthesis of secondary metabolites; ko01212 Fatty acid metabolism; ko00062 Fatty acid elongation; ko01040 Biosynthesis of unsaturated fatty acids;
CL12864Contig1_orf1	hypothetical protein DAPPUDRAFT_306210	45.74	1.07369	1.00202	0.786848	0.850511	1.05259	1.02915	0.920525	0.987215	0.947458	0.966816	1.18082	1.09338	extracellular	single-organism process; metabolic process; primary metabolic process; single-organism metabolic process; lipid metabolic process; organic substance metabolic process;	organelle; intracellular membrane-bounded organelle; intracellular organelle; cell part; intracellular; lysosome; cytoplasm; vacuole; intracellular part; cell; membrane-bounded organelle; cytoplasmic part; lytic vacuole;		K12348	ASAH1; acid ceramidase [EC:3.5.1.23]	ko00600 Sphingolipid metabolism; ko01100 Metabolic pathways; ko04071 Sphingolipid signaling pathway; ko04142 Lysosome;	IPR029130; IPR029132;	Acid ceramidase, N-terminal; Choloylglycine hydrolase/NAAA C-terminal;
CL1287Contig2_orf1	gephyrin-like	70.393	0.850738	0.845583	1.12807	1.29117	1.39434	1.34517	0.605015	0.651538	0.762845	0.631063	0.794166	0.849449	cytosol	cofactor biosynthetic process; molybdopterin cofactor metabolic process; molybdopterin cofactor biosynthetic process; cellular protein metabolic process; Mo-molybdopterin cofactor biosynthetic process; biosynthetic process; organonitrogen compound biosynthetic process; cellular metabolic process; Mo-molybdopterin cofactor metabolic process; phosphate-containing compound metabolic process; organic…			K15376	GPHN; gephyrin [EC:2.10.1.1 2.7.7.75]	ko00790 Folate biosynthesis; ko04727 GABAergic synapse; ko01100 Metabolic pathways;	IPR005110; IPR005111; IPR001453;	MoeA, N-terminal and linker domain; MoeA, C-terminal, domain IV; MoaB/Mog domain;
CL128Contig5_orf1	delta-1-pyrroline-5-carboxylate dehydrogenase, mitochondrial	64.587	1.01972	1.02442	1.30423	1.25686	0.642235	0.640529	0.999426	1.02779	1.07484	1.09637	1.00206	0.990699	mitochondria	dicarboxylic acid metabolic process; organic acid biosynthetic process; single-organism process; biosynthetic process; organonitrogen compound biosynthetic process; cellular metabolic process; glutamine family amino acid biosynthetic process; organic substance metabolic process; metabolic process; cellular amino acid metabolic process; heterocycle metabolic process; alpha-amino acid biosynthetic …		oxidoreductase activity, acting on the aldehyde or oxo group of donors, NAD or NADP as acceptor; oxidoreductase activity, acting on the CH-NH group of donors; oxidoreductase activity, acting on the CH-NH group of donors, NAD or NADP as acceptor; catalytic activity; oxidoreductase activity, acting on the aldehyde or oxo group of donors; oxidoreductase activity; 1-pyrroline-5-carboxylate dehydrogen…	K00294	E1.2.1.88; 1-pyrroline-5-carboxylate dehydrogenase [EC:1.2.1.88]	ko00250 Alanine, aspartate and glutamate metabolism; ko00330 Arginine and proline metabolism; ko01100 Metabolic pathways;	IPR016161; IPR015590; IPR016162; IPR016163;	Aldehyde/histidinol dehydrogenase; Aldehyde dehydrogenase domain; Aldehyde dehydrogenase N-terminal domain; Aldehyde dehydrogenase, C-terminal;
CL1292Contig1_orf1	hypothetical protein L798_01615	86.136	0.970809	1.00735	1.07334	1.23878	1.01076	1.20878	0.804368	0.743366	0.900884	0.670357	0.971284	0.825212	extracellular
CL12939Contig1_orf1	hypothetical protein LOTGIDRAFT_228978	60.705	0.86921	0.929404	1.20181	1.05106	1.38123	1.18913	0.713403	0.737666	0.773517	0.970854	0.788179	0.730922	cytosol	metabolic process; single-organism metabolic process; small molecule metabolic process; single-organism cellular process; carboxylic acid metabolic process; single-organism process; organic acid metabolic process; cellular metabolic process; cellular process; oxoacid metabolic process; organic substance metabolic process;		organic cyclic compound binding; heterocyclic compound binding; catalytic activity; binding; carbon-carbon lyase activity; ion binding; carboxy-lyase activity; lyase activity; anion binding; cofactor binding; pyridoxal phosphate binding;	K01634	SGPL1; sphinganine-1-phosphate aldolase [EC:4.1.2.27]	ko00600 Sphingolipid metabolism; ko01100 Metabolic pathways; ko04071 Sphingolipid signaling pathway;	IPR015424; IPR015421;	Pyridoxal phosphate-dependent transferase; Pyridoxal phosphate-dependent transferase, major region, subdomain 1;
CL1295Contig5_orf1	acyl-coenzyme A thioesterase 1-like	15.09	1.16951	1.01482	1.09424	0.99306	0.897736	1.10138	1.03628	1.07426	0.920465	0.848047	0.872655	0.913911	cytosol							IPR014940; IPR029058;	BAAT/Acyl-CoA thioester hydrolase C-terminal; Alpha/Beta hydrolase fold;
CL1296Contig7_orf1	hypothetical protein DAPPUDRAFT_210803	41.912													plasma membrane	transport; transmembrane transport; single-organism localization; cation transport; metal ion transport; ion transport; single-organism cellular process; single-organism process; localization; cellular process; single-organism transport; establishment of localization;	membrane;	metal ion transmembrane transporter activity; ion transmembrane transporter activity; substrate-specific transporter activity; inorganic cation transmembrane transporter activity; cation transmembrane transporter activity; substrate-specific transmembrane transporter activity; transporter activity; transmembrane transporter activity;	K14709
CL129Contig9_orf1	multidrug resistance-associated protein 1	171.18	0.988311		0.953528		0.522059		1.74084		1.04001		1.05403		plasma membrane	transport; transmembrane transport; single-organism localization; single-organism cellular process; single-organism process; localization; cellular process; single-organism transport; establishment of localization;	intrinsic component of membrane; membrane; integral component of membrane; membrane part;	nucleoside phosphate binding; primary active transmembrane transporter activity; hydrolase activity, acting on acid anhydrides; hydrolase activity; ATPase activity; organic cyclic compound binding; heterocyclic compound binding; pyrophosphatase activity; catalytic activity; ribonucleotide binding; ATPase activity, coupled to movement of substances; binding; purine ribonucleoside binding; hydrolas…				IPR003593; IPR003439; IPR011527; IPR027417;	AAA+ ATPase domain; ABC transporter-like; ABC transporter type 1, transmembrane domain; P-loop containing nucleoside triphosphate hydrolase;
CL12Contig10_orf1	hypothetical protein DAPPUDRAFT_333758	119.69	0.83911	1.02267	0.685252	0.659627	1.03256	1.00381	1.11115	1.15804	1.17633	1.12927	1.32814	1.23375	mitochondria	single-organism carbohydrate metabolic process; metabolic process; single-organism metabolic process; monosaccharide metabolic process; single-organism process; mannose metabolic process; primary metabolic process; carbohydrate metabolic process; organic substance metabolic process; hexose metabolic process;		mannosidase activity; transition metal ion binding; catalytic activity; binding; alpha-mannosidase activity; ion binding; hydrolase activity, acting on glycosyl bonds; cation binding; carbohydrate binding; hydrolase activity, hydrolyzing O-glycosyl compounds; metal ion binding; hydrolase activity; zinc ion binding;	K01191	E3.2.1.24; alpha-mannosidase [EC:3.2.1.24]	ko00511 Other glycan degradation;	IPR011013; IPR027291; IPR011330; IPR028995; IPR000602; IPR011682; IPR015341;	Galactose mutarotase-like domain; Glycoside hydrolase 38/57, N-terminal domain; Glycoside hydrolase/deacetylase, beta/alpha-barrel; Glycoside hydrolase families 57/38, central domain; Glycoside hydrolase family 38, N-terminal domain; Glycosyl hydrolase family 38, C-terminal; Glycoside hydrolase family 38, central domain;
CL12Contig11_orf1	hypothetical protein DAPPUDRAFT_333758	122.29	0.547771	0.748737	0.451676	0.706017	0.641935	0.731511	2.33035	1.9648	0.983127	1.1111	1.54822	1.50209	nuclear	single-organism carbohydrate metabolic process; metabolic process; single-organism metabolic process; monosaccharide metabolic process; single-organism process; mannose metabolic process; primary metabolic process; carbohydrate metabolic process; organic substance metabolic process; hexose metabolic process;		mannosidase activity; transition metal ion binding; catalytic activity; binding; ion binding; alpha-mannosidase activity; hydrolase activity, acting on glycosyl bonds; cation binding; metal ion binding; hydrolase activity, hydrolyzing O-glycosyl compounds; carbohydrate binding; hydrolase activity; zinc ion binding;	K01191	E3.2.1.24; alpha-mannosidase [EC:3.2.1.24]	ko00511 Other glycan degradation;	IPR011013; IPR027291; IPR011330; IPR028995; IPR000602; IPR011682; IPR015341;	Galactose mutarotase-like domain; Glycoside hydrolase 38/57, N-terminal domain; Glycoside hydrolase/deacetylase, beta/alpha-barrel; Glycoside hydrolase families 57/38, central domain; Glycoside hydrolase family 38, N-terminal domain; Glycosyl hydrolase family 38, C-terminal; Glycoside hydrolase family 38, central domain;
CL12Contig16_orf1	hypothetical protein DAPPUDRAFT_333758	112.34	2.21479		1.54551		1.05793		0.213665		0.283459		0.230576		nuclear	single-organism carbohydrate metabolic process; metabolic process; single-organism metabolic process; monosaccharide metabolic process; single-organism process; mannose metabolic process; primary metabolic process; carbohydrate metabolic process; organic substance metabolic process; hexose metabolic process;		mannosidase activity; transition metal ion binding; catalytic activity; binding; ion binding; alpha-mannosidase activity; hydrolase activity, acting on glycosyl bonds; cation binding; metal ion binding; hydrolase activity, hydrolyzing O-glycosyl compounds; carbohydrate binding; hydrolase activity; zinc ion binding;	K01191	E3.2.1.24; alpha-mannosidase [EC:3.2.1.24]	ko00511 Other glycan degradation;	IPR011013; IPR027291; IPR011330; IPR028995; IPR015341; IPR000602; IPR011682;	Galactose mutarotase-like domain; Glycoside hydrolase 38/57, N-terminal domain; Glycoside hydrolase/deacetylase, beta/alpha-barrel; Glycoside hydrolase families 57/38, central domain; Glycoside hydrolase family 38, central domain; Glycoside hydrolase family 38, N-terminal domain; Glycosyl hydrolase family 38, C-terminal;
CL12Contig5_orf1	WD repeat-containing protein 26	74.152													nuclear			protein binding; binding;				IPR017986; IPR006595; IPR015943; IPR006594;	WD40-repeat-containing domain; CTLH, C-terminal LisH motif; WD40/YVTN repeat-like-containing domain; LIS1 homology motif;
CL12Contig9_orf1	Membrane-bound transcription factor site-2 protease	55.093	1.08794		0.966189		0.924098		1.09484		0.939794		1.03494		plasma membrane	proteolysis; metabolic process; macromolecule metabolic process; protein metabolic process; primary metabolic process; organic substance metabolic process;	membrane;	endopeptidase activity; metalloendopeptidase activity; peptidase activity; catalytic activity; binding; peptidase activity, acting on L-amino acid peptides; protein binding; hydrolase activity; metallopeptidase activity;	K07765	MBTPS2; S2P endopeptidase [EC:3.4.24.85]	ko04141 Protein processing in endoplasmic reticulum;	IPR008915; IPR001478;	Peptidase M50; PDZ domain;
CL13009Contig1_orf1	single IB domain protein	10.731	0.798477		1.33617		1.36962		0.869792		0.751336		0.556596		extracellular	regulation of cell growth; regulation of cellular process; regulation of biological process; regulation of growth; regulation of cellular component organization; biological regulation;	extracellular region;	insulin-like growth factor binding; protein binding; growth factor binding; binding;				IPR000867; IPR009030;	Insulin-like growth factor-binding protein, IGFBP; Growth factor receptor cysteine-rich domain;
CL1314Contig1_orf1	Endothelin-converting enzyme-like 1	107.89	0.300806		2.1151		1.76401		0.292925		0.339905		0.305754		plasma membrane	proteolysis; metabolic process; macromolecule metabolic process; protein metabolic process; primary metabolic process; organic substance metabolic process;		endopeptidase activity; metalloendopeptidase activity; peptidase activity; catalytic activity; peptidase activity, acting on L-amino acid peptides; hydrolase activity; metallopeptidase activity;				IPR008753; IPR024079; IPR018497;	Peptidase M13, N-terminal domain; Metallopeptidase, catalytic domain; Peptidase M13, C-terminal domain;
CL13171Contig1_orf1	Insulin-degrading enzyme	115.86	1.09751	0.81933	0.92792	1.21797	1.25321	1.3369	0.855891	0.670575	0.972486	0.846289	0.798012	0.752115	cytosol	proteolysis; metabolic process; macromolecule metabolic process; protein metabolic process; primary metabolic process; organic substance metabolic process;		endopeptidase activity; metalloendopeptidase activity; peptidase activity; catalytic activity; binding; ion binding; peptidase activity, acting on L-amino acid peptides; cation binding; metal ion binding; metallopeptidase activity; hydrolase activity;	K01408	IDE; insulysin [EC:3.4.24.56]	ko05010 Alzheimer's disease;	IPR007863; IPR032632; IPR011765; IPR011249; IPR011237;	Peptidase M16, C-terminal; Peptidase M16, middle/third domain; Peptidase M16, N-terminal; Metalloenzyme, LuxS/M16 peptidase-like; Peptidase M16 domain;
CL13175Contig1_orf1	hypothetical protein DAPPUDRAFT_228686	39.321	1.31101	1.38958	0.791267	0.794431	0.808387	0.825727	1.08209	0.99638	0.9004	0.932246	1.26343	1.2277	extracellular
CL1319Contig1_orf1	Arrestin domain-containing protein 3	54.92	1.07025	1.00803	0.941048	1.05212	0.930948	0.918387	0.797545	0.785775	0.812782	0.858562	1.46528	1.33242	cytosol							IPR011021; IPR014756; IPR011022;	Arrestin-like, N-terminal; Immunoglobulin E-set; Arrestin C-terminal-like domain;
CL1326Contig4_orf1	hypothetical protein DAPPUDRAFT_333779	65.958	1.00127		0.914931		0.96924		1.21825		0.985596		0.982739		extracellular	single-organism process; metabolic process; oxidation-reduction process; single-organism metabolic process;		oxidoreductase activity, acting on single donors with incorporation of molecular oxygen, incorporation of two atoms of oxygen; oxidoreductase activity, acting on single donors with incorporation of molecular oxygen; catalytic activity; dioxygenase activity; oxidoreductase activity;	K18048
CL1328Contig3_orf1	Annexin-B9	38.827	0.938141	0.990034	0.852637	0.845828	0.966253	0.962275	1.07473	1.12231	0.747849	0.781402	1.38749	1.39473	cytosol			calcium-dependent phospholipid binding; binding; phospholipid binding; ion binding; lipid binding; cation binding; metal ion binding; anion binding; calcium ion binding;	K17095
CL1328Contig5_orf1	Annexin-B9	36.59	1.22395	1.24221	0.732823	0.759887	0.998223	1.00121	1.20177	1.21277	0.704578	0.698153	1.15752	1.17729	cytosol			calcium-dependent phospholipid binding; binding; phospholipid binding; ion binding; lipid binding; cation binding; metal ion binding; anion binding; calcium ion binding;	K17095
CL13446Contig1_orf1	syntaxin-8-like	15.237	1.04492	0.954961	0.896131	0.989758	0.882088	0.984531	1.21312	1.18495	0.978507	0.904415	1.09818	1.02888	mitochondria			protein binding; binding;	K08501	STX8; syntaxin 8	ko04130 SNARE interactions in vesicular transport;	IPR000727;	Target SNARE coiled-coil homology domain;
CL1347Contig2_orf1	juvenile hormone epoxide hydrolase	52.075	1.64539	1.10242	1.65275	1.06211	0.754301	0.514144	0.687635	1.33238	0.502476	0.98092	0.47528	1.31588	endoplasmic reticulum			cis-stilbene-oxide hydrolase activity; hydrolase activity; hydrolase activity, acting on ether bonds; catalytic activity; ether hydrolase activity;	K10719	JHEH; juvenile hormone epoxide hydrolase	ko00981 Insect hormone biosynthesis;	IPR029058; IPR010497;	Alpha/Beta hydrolase fold; Epoxide hydrolase, N-terminal;
CL1347Contig5_orf1	juvenile hormone epoxide hydrolase	56.103		0.534927		0.631284		0.533963		2.45643		2.05976		0.565368	mitochondria			cis-stilbene-oxide hydrolase activity; hydrolase activity; hydrolase activity, acting on ether bonds; catalytic activity; ether hydrolase activity;	K10719	JHEH; juvenile hormone epoxide hydrolase	ko00981 Insect hormone biosynthesis;	IPR010497; IPR029058;	Epoxide hydrolase, N-terminal; Alpha/Beta hydrolase fold;
CL1347Contig6_orf1	epoxide hydrolase 1-like	43.14	1.17677	0.859501	2.8668	2.1982	0.883931	0.647908	0.0588387	0.28616	0.041625	0.229004	0.0349629	0.350623	mitochondria			catalytic activity;				IPR029058; IPR010497;	Alpha/Beta hydrolase fold; Epoxide hydrolase, N-terminal;
CL1348Contig1_orf1	hypothetical protein TcasGA2_TC013747	66.766	0.974838	0.963394	0.990111	0.906612	0.928931	0.882398	0.964084	0.892207	0.979835	1.11263	1.19219	1.36308	plasma membrane	transport; transmembrane transport; single-organism localization; single-organism cellular process; single-organism process; localization; cellular process; single-organism transport; establishment of localization;	membrane;	transporter activity;	K14388
CL13528Contig1_orf1	DCN1-like protein 1	30.559	0.930738		1.14687		1.30567		0.76482		0.778576		0.848215		nuclear			protein binding; binding;	K17822			IPR005176; IPR009060;	Potentiating neddylation domain; UBA-like;
CL1352Contig5_orf1	polysaccharide lyase family 8, supersandwich subfamily protein	75.998	1.17183	1.34614	0.869814	0.863486	0.774855	0.680219	0.890871	0.903106	1.38902	1.06161	0.996851	1.07546	extracellular	metabolic process; carbohydrate metabolic process; primary metabolic process; organic substance metabolic process;	extracellular region;	carbon-oxygen lyase activity, acting on polysaccharides; carbohydrate binding; lyase activity; catalytic activity; carbon-oxygen lyase activity; binding;				IPR011013; IPR012970; IPR014718; IPR012329; IPR008929; IPR003159;	Galactose mutarotase-like domain; Polysaccharide lyase 8, N-terminal alpha-helical; Glycoside hydrolase-type carbohydrate-binding; Polysaccharide lyase family 8, N-terminal; Chondroitin AC/alginate lyase; Polysaccharide lyase family 8, central domain;
CL13536Contig1_orf1	AGAP005673-PA	26.294													cytosol			transferase activity, transferring one-carbon groups; methyltransferase activity; catalytic activity; transferase activity;				IPR025714; IPR029063;	Methyltransferase domain; S-adenosyl-L-methionine-dependent methyltransferase;
CL13544Contig1_orf1	Chymotrypsin BI	28.676													extracellular	proteolysis; metabolic process; macromolecule metabolic process; protein metabolic process; primary metabolic process; organic substance metabolic process;		serine-type endopeptidase activity; endopeptidase activity; peptidase activity; catalytic activity; serine hydrolase activity; serine-type peptidase activity; peptidase activity, acting on L-amino acid peptides; hydrolase activity;	K20752			IPR009003; IPR001254;	Peptidase S1, PA clan; Serine proteases, trypsin domain;
CL1358Contig3_orf1	eukaryotic translation initiation factor 3 subunit L	64.333	0.903077	0.922873	1.55352	1.4449	1.1954	1.17874	0.597786	0.772576	0.774984	0.701093	0.658163	0.753389	cytosol, nuclear		cell part; intracellular; cytoplasm; macromolecular complex; intracellular part; protein complex; cell; cytoplasmic part; eukaryotic translation initiation factor 3 complex;	organic cyclic compound binding; heterocyclic compound binding; RNA binding; translation factor activity, nucleic acid binding; binding; nucleic acid binding; translation initiation factor activity; protein binding;	K15029			IPR011990;	Tetratricopeptide-like helical domain;
CL13591Contig1_orf1	hemocyanin	18.337	0.52625	0.699995	1.44836	1.23293	2.02229	1.66678	0.348765	0.578918	0.435185	0.67119	0.522901	0.577532	cytosol							IPR005203; IPR014756;	Hemocyanin, C-terminal; Immunoglobulin E-set;
CL13595Contig1_orf1	serine protease	21.85													mitochondria	proteolysis; metabolic process; macromolecule metabolic process; protein metabolic process; primary metabolic process; organic substance metabolic process;		serine-type endopeptidase activity; endopeptidase activity; peptidase activity; catalytic activity; serine hydrolase activity; serine-type peptidase activity; peptidase activity, acting on L-amino acid peptides; hydrolase activity;				IPR009003; IPR001254;	Peptidase S1, PA clan; Serine proteases, trypsin domain;
CL13621Contig1_orf1	ribosome biogenesis protein WDR12 homolog	48.938	1.07794	0.964226	1.32705	1.36958	1.07348	1.11727	0.788045	0.575339	0.791315	0.881695	0.729324	0.728041	cytosol	cellular component biogenesis; ribosome biogenesis; ribonucleoprotein complex biogenesis; cellular component organization or biogenesis;		protein binding; binding;	K14863			IPR012972; IPR017986; IPR015943;	NLE; WD40-repeat-containing domain; WD40/YVTN repeat-like-containing domain;
CL13631Contig1_orf1	glutaredoxin-2, mitochondrial isoform X1	12.43													extracellular	regulation of cellular process; homeostatic process; regulation of biological quality; regulation of biological process; cell redox homeostasis; single-organism cellular process; cellular homeostasis; single-organism process; cellular process; biological regulation;		electron carrier activity; protein disulfide oxidoreductase activity; oxidoreductase activity, acting on a sulfur group of donors; disulfide oxidoreductase activity; catalytic activity; oxidoreductase activity;	K03676			IPR002109; IPR011899; IPR014025; IPR012336;	Glutaredoxin; Glutaredoxin, eukaryotic/virial; Glutaredoxin subgroup; Thioredoxin-like fold;
CL13683Contig2_orf1	hypothetical protein BRAFLDRAFT_124569	36.882	2.92374	1.76175	0.878086	0.95668	0.377602	0.678364	0.622662	1.06179	1.14823	0.75232	0.226931	0.930865	mitochondria	metabolic process; carbohydrate metabolic process; primary metabolic process; organic substance metabolic process;		carbon-oxygen lyase activity, acting on polysaccharides; lyase activity; catalytic activity; carbon-oxygen lyase activity;				IPR012970; IPR012329; IPR008929;	Polysaccharide lyase 8, N-terminal alpha-helical; Polysaccharide lyase family 8, N-terminal; Chondroitin AC/alginate lyase;
CL1371Contig2_orf1	unknown	38.602	0.964347	0.960562	1.05896	1.07365	0.851445	1.05926	1.05811	0.971885	1.162	1.04476	0.893026	0.83661	cytosol	NADP metabolic process; pyridine nucleotide metabolic process; cellular aromatic compound metabolic process; nicotinamide nucleotide metabolic process; organophosphate catabolic process; nucleotide metabolic process; single-organism process; cellular metabolic process; pyridine-containing compound metabolic process; phosphate-containing compound metabolic process; organic substance metabolic proc…	intracellular part; cell; cell part; intracellular; cytoplasm;	sedoheptulose-7-phosphate:D-glyceraldehyde-3-phosphate glyceronetransferase activity; catalytic activity; transferase activity; transferase activity, transferring aldehyde or ketonic groups;	K00616	E2.2.1.2; transaldolase [EC:2.2.1.2]	ko00030 Pentose phosphate pathway; ko01120 Microbial metabolism in diverse environments; ko01130 Biosynthesis of antibiotics; ko01200 Carbon metabolism; ko01110 Biosynthesis of secondary metabolites; ko01230 Biosynthesis of amino acids; ko01100 Metabolic pathways;	IPR013785;	Aldolase-type TIM barrel;
CL1373Contig2_orf1	pacifastin heavy chain	148.76	0.696725	0.766427	1.53633	1.63312	1.30252	1.25017	0.506955	0.476078	0.521592	0.604892	0.685682	0.62636	extracellular		extracellular region;					IPR001156;	Transferrin-like domain;
CL13847Contig1_orf1	hemolectin	26.005	0.891327	0.953993	1.22719	1.13656	1.18802	1.09795	0.918887	0.988945	0.75612	0.794076	0.779185	0.856647	extracellular							IPR004133; IPR006207;	DAN; Cystine knot, C-terminal;
CL1388Contig1_orf1	hemolymph clottable protein	189.17	0.82197	0.809011	1.25464	1.23519	1.34767	1.32403	0.523048	0.518509	1.0257	0.966212	0.60781	0.632265	extracellular	transport; lipid transport; single-organism localization; single-organism process; lipid localization; organic substance transport; macromolecule localization; localization; single-organism transport; establishment of localization;		lipid transporter activity; substrate-specific transporter activity; transporter activity;				IPR015816; IPR011030; IPR015819; IPR001747; IPR001846;	Vitellinogen, beta-sheet N-terminal; Vitellinogen, superhelical; Lipid transport protein, beta-sheet shell; Lipid transport protein, N-terminal; von Willebrand factor, type D domain;
CL1393Contig3_orf1	U3 small nucleolar RNA-associated protein 14 homolog C	58.381		0.555457		0.869004		2.5276		0.443695		0.271912		0.411002	nuclear	rRNA metabolic process; ncRNA processing; cellular component biogenesis; ribonucleoprotein complex biogenesis; cellular aromatic compound metabolic process; ribosome biogenesis; organic cyclic compound metabolic process; nitrogen compound metabolic process; primary metabolic process; cellular metabolic process; organic substance metabolic process; RNA metabolic process; metabolic process; nucleic…	cell part; intracellular; macromolecular complex; intracellular part; small-subunit processome; ribonucleoprotein complex; cell; preribosome;		K14567	UTP14; U3 small nucleolar RNA-associated protein 14	ko03008 Ribosome biogenesis in eukaryotes;
CL13993Contig1_orf1	Thrombospondin-3 precursor, putative	65.219	0.637332	0.744592	2.22052	2.00525	0.788842	0.916204	0.571549	0.596221	0.543295	0.588705	0.465799	0.622387	cytosol	cell adhesion; biological adhesion;		cation binding; metal ion binding; protein binding; calcium ion binding; binding; ion binding;	K04659	THBS2S; thrombospondin 2/3/4/5	ko05144 Malaria; ko04512 ECM-receptor interaction; ko04510 Focal adhesion; ko04145 Phagosome; ko04151 PI3K-Akt signaling pathway;	IPR024665; IPR001881; IPR000742; IPR009030; IPR023413;	Thrombospondin/cartilage oligomeric matrix protein, coiled-coil domain; EGF-like calcium-binding domain; EGF-like domain; Growth factor receptor cysteine-rich domain; Green fluorescent protein-like;
CL139Contig6_orf2	uncharacterized protein LOC105692508 isoform X1	49.385	0.750646	0.749223	1.0788	1.154	1.4478	1.47155	0.698378	0.588753	0.699621	0.658941	0.858921	0.805759	cytosol, nuclear	nucleoside metabolic process; cellular aromatic compound metabolic process; small molecule metabolic process; single-organism cellular process; nitrogen compound metabolic process; single-organism process; organic cyclic compound metabolic process; primary metabolic process; pyrimidine nucleobase metabolic process; cellular metabolic process; organic substance metabolic process; metabolic process…		pyrimidine-nucleoside phosphorylase activity; transferase activity, transferring pentosyl groups; transferase activity, transferring glycosyl groups; transferase activity, transferring hexosyl groups; catalytic activity; transferase activity; phosphorylase activity;				IPR017459; IPR013102; IPR000312;	Glycosyl transferase family 3, N-terminal domain; Pyrimidine nucleoside phosphorylase, C-terminal; Glycosyl transferase, family 3;
CL14113Contig1_orf1	KPI2	25.76		0.855189		1.05992		1.22641		0.80075		0.986184		0.887431	extracellular			protein binding; binding;				IPR002350;	Kazal domain;
CL14113Contig2_orf1	KPI2	28.203	0.575994	0.708991	2.11223	1.63708	0.908491	0.897165	0.65306	0.905394	0.724583	0.833063	0.545266	0.759157	extracellular			protein binding; binding;				IPR002350;	Kazal domain;
CL14175Contig1_orf1	uncharacterized protein LOC101891516	16.778	0.69013	0.762116	1.40458	1.2838	1.23068	1.11039	0.738968	0.878918	0.667074	0.791003	0.846263	0.942147	plasma membrane
CL14186Contig1_orf1	kinectin isoform X4	107.98	0.740304	0.694715	1.15342	1.10081	1.60239	1.54053	0.741382	0.804529	0.649546	0.697758	0.76231	0.776321	endoplasmic reticulum				K14000	RRBP1; ribosome-binding protein 1	ko04141 Protein processing in endoplasmic reticulum;
CL14193Contig1_orf1	phosphoglycolate phosphatase	35.829	0.85261	0.943098	1.10699	1.19066	1.24948	1.21453	0.909694	0.806924	0.785033	0.737873	0.93157	0.843051	cytoskeleton	metabolic process;		hydrolase activity; catalytic activity; phosphoric ester hydrolase activity; phosphatase activity; hydrolase activity, acting on ester bonds;				IPR023215; IPR023214;	Nitrophenylphosphatase-like domain; HAD-like domain;
CL14240Contig1_orf1	AGAP012352-PA	17.976	0.889472		0.9584		1.25217		0.881632		1.01728		0.90964		extracellular							IPR003172; IPR014756;	MD-2-related lipid-recognition domain; Immunoglobulin E-set;
CL14271Contig1_orf1	hypothetical protein BRAFLDRAFT_124749	84.658	0.934204	0.99159	0.835609	0.806342	1.25446	1.18165	0.874326	0.90049	0.95773	0.947216	1.06863	1.14458	plasma membrane			protein binding; binding;				IPR013783; IPR003961;	Immunoglobulin-like fold; Fibronectin type III;
CL1427Contig3_orf1	uncharacterized protein LOC103517222	47.053	1.1801		1.06709		1.33515		0.795926		0.736972		0.669927		mitochondria							IPR015897; IPR011009;	CHK kinase-like; Protein kinase-like domain;
CL14340Contig1_orf1	hypothetical protein DAPPUDRAFT_301953	49.021	0.921178	0.919977	1.33971	1.63331	1.23029	1.17307	0.689992	0.674517	0.595915	0.554823	0.776129	0.720489	cytosol	cell morphogenesis; developmental process; anatomical structure morphogenesis; cellular component organization; organelle organization; single-organism developmental process; cellular developmental process; single-organism cellular process; cellular component morphogenesis; single-organism process; cytoskeleton organization; anatomical structure development; cellular process; cellular component o…		actin binding; protein binding; cytoskeletal protein binding; binding;	K17261			IPR006599; IPR013992; IPR016098; IPR017901; IPR013912;	CARP motif; Adenylate cyclase-associated CAP, N-terminal; Cyclase-associated protein CAP/septum formation inhibitor MinC, C-terminal; C-CAP/cofactor C-like domain; Adenylate cyclase-associated CAP, C-terminal;
CL14349Contig1_orf1	hypothetical protein DAPPUDRAFT_301204	59.666	0.877788		1.30508		1.24671		0.542511		0.832084		0.908367		cytosol	metabolic process; single-organism metabolic process; small molecule metabolic process; single-organism cellular process; carboxylic acid metabolic process; single-organism process; organic acid metabolic process; cellular metabolic process; cellular process; oxoacid metabolic process; organic substance metabolic process;		organic cyclic compound binding; heterocyclic compound binding; catalytic activity; binding; carbon-carbon lyase activity; ion binding; carboxy-lyase activity; lyase activity; anion binding; cofactor binding; pyridoxal phosphate binding;	K01580	E4.1.1.15; glutamate decarboxylase [EC:4.1.1.15]	ko04727 GABAergic synapse; ko01110 Biosynthesis of secondary metabolites; ko00430 Taurine and hypotaurine metabolism; ko01100 Metabolic pathways; ko01120 Microbial metabolism in diverse environments; ko00250 Alanine, aspartate and glutamate metabolism; ko00410 beta-Alanine metabolism; ko02024 Quorum sensing; ko04940 Type I diabetes mellitus; ko00650 Butanoate metabolism;	IPR015424; IPR015421; IPR015422;	Pyridoxal phosphate-dependent transferase; Pyridoxal phosphate-dependent transferase, major region, subdomain 1; Pyridoxal phosphate-dependent transferase, major region, subdomain 2;
CL14389Contig1_orf1	phospholipid scramblase 1	21.828	1.11678	1.18567	1.03933	0.973941	0.894869	0.894135	0.981949	1.07552	0.766614	0.858029	1.10606	1.09563	cytosol, nuclear
CL14418Contig1_orf1	ecdysteroid regulated-like protein	17.672		0.842572		1.13176		1.21893		0.64439		0.960679		0.962852	mitochondria				K13443	NPC2; Niemann-Pick C2 protein	ko04142 Lysosome;	IPR014756; IPR003172;	Immunoglobulin E-set; MD-2-related lipid-recognition domain;
CL14439Contig1_orf1	prolyl endopeptidase isoform X1	72.733	0.927198	0.849055	1.28667	1.10365	1.02616	1.06912	0.896279	0.939285	0.808082	0.926493	0.829081	0.971353	mitochondria	proteolysis; metabolic process; macromolecule metabolic process; protein metabolic process; primary metabolic process; organic substance metabolic process;		serine-type endopeptidase activity; endopeptidase activity; exopeptidase activity; peptidase activity; catalytic activity; serine hydrolase activity; serine-type peptidase activity; peptidase activity, acting on L-amino acid peptides; hydrolase activity; serine-type exopeptidase activity;	K01322	PREP; prolyl oligopeptidase [EC:3.4.21.26]	ko04614 Renin-angiotensin system;	IPR001375; IPR029058; IPR023302;	Peptidase S9, prolyl oligopeptidase, catalytic domain; Alpha/Beta hydrolase fold; Peptidase S9A, N-terminal domain;
CL14579Contig1_orf1	LOW QUALITY PROTEIN: copper-transporting ATPase 1	154.05	1.09599	1.05891	1.08671	1.04818	1.32281	1.28734	0.820376	0.728298	0.709839	0.706173	0.88566	0.855819	plasma membrane	transport; single-organism localization; cation transport; metal ion transport; ion transport; single-organism process; localization; establishment of localization; single-organism transport;	intrinsic component of membrane; membrane; integral component of membrane; membrane part;	ATPase activity, coupled to transmembrane movement of ions; nucleoside phosphate binding; primary active transmembrane transporter activity; substrate-specific transporter activity; hydrolase activity, acting on acid anhydrides; hydrolase activity; copper ion binding; substrate-specific transmembrane transporter activity; ATPase activity; organic cyclic compound binding; heterocyclic compound bin…	K17686	copA; Cu+-exporting ATPase [EC:3.6.3.54]	ko04016 MAPK signaling pathway - plant; ko01524 Platinum drug resistance;	IPR006121; IPR008250; IPR023299; IPR006122; IPR023214;	Heavy metal-associated domain, HMA; P-type ATPase, A domain; P-type ATPase, cytoplasmic domain N; Heavy metal-associated domain, copper ion-binding; HAD-like domain;
CL1457Contig2_orf1	hypothetical protein DAPPUDRAFT_306788	111.85	0.687441	0.646142	1.3317	1.34782	1.69341	1.49623	0.457032	0.51492	0.613904	0.639111	0.72084	0.828673	endoplasmic reticulum				K09486	HYOU1; hypoxia up-regulated 1	ko04141 Protein processing in endoplasmic reticulum;	IPR029048; IPR029047;	Heat shock protein 70kD, C-terminal domain; Heat shock protein 70kD, peptide-binding domain;
CL14631Contig1_orf1	hypothetical protein DAPPUDRAFT_314628	31.87													extracellular		extracellular matrix; extracellular region part; extracellular region; proteinaceous extracellular matrix;	endopeptidase activity; metalloendopeptidase activity; peptidase activity; transition metal ion binding; catalytic activity; binding; ion binding; cation binding; metal ion binding; peptidase activity, acting on L-amino acid peptides; hydrolase activity; metallopeptidase activity; zinc ion binding;	K08622			IPR010294;	ADAM-TS Spacer 1;
CL1463Contig1_orf1	hypothetical protein DAPPUDRAFT_226211	52.272	0.830803	0.847652	1.03588	1.14432	1.2507	1.15201	0.775922	0.750198	1.22807	1.08718	0.758699	0.829867	cytosol	single-organism process; metabolic process; oxidation-reduction process; single-organism metabolic process;		catalytic activity; oxidoreductase activity;	K00471	E1.14.11.1; gamma-butyrobetaine dioxygenase [EC:1.14.11.1]	ko00310 Lysine degradation;	IPR010376; IPR003819;	Domain of unknown function DUF971; TauD/TfdA-like domain;
CL14647Contig1_orf1	clathrin heavy chain	190.55	1.03974	1.03595	1.04683	1.12348	1.31248	1.36708	0.850705	0.731474	0.906518	0.792994	0.766386	0.668484	mitochondria	establishment of protein localization; transport; intracellular transport; cellular macromolecule localization; establishment of localization in cell; vesicle-mediated transport; intracellular protein transport; organic substance transport; protein localization; macromolecule localization; cellular protein localization; localization; protein transport; establishment of localization; cellular loca…	transport vesicle membrane; membrane; clathrin coat of trans-Golgi network vesicle; cytoplasmic vesicle; organelle membrane; membrane-bounded vesicle; cell periphery; cytoplasmic membrane-bounded vesicle; vesicle; Golgi-associated vesicle membrane; cytoplasm; cytoplasmic vesicle part; macromolecular complex; intracellular part; vesicle coat; cell; organelle part; coated vesicle membrane; trans-Go…	protein binding; structural molecule activity; binding;	K04646	CLTC; clathrin heavy chain	ko05100 Bacterial invasion of epithelial cells; ko04721 Synaptic vesicle cycle; ko05016 Huntington's disease; ko04961 Endocrine and other factor-regulated calcium reabsorption; ko04142 Lysosome; ko04144 Endocytosis;	IPR015348; IPR016025; IPR011990; IPR016024; IPR001473;	Clathrin, heavy chain, linker, core motif; Clathrin, heavy chain, linker/propeller domain; Tetratricopeptide-like helical domain; Armadillo-type fold; Clathrin, heavy chain, propeller, N-terminal;
CL1464Contig3_orf1	lactate dehydrogenase	37.871	1.02475	0.925269	1.39892	1.26624	1.0489	0.933414	0.852071	0.846398	0.739755	0.874644	0.707858	1.03809	mitochondria	metabolic process; oxidation-reduction process; single-organism metabolic process; small molecule metabolic process; single-organism cellular process; carboxylic acid metabolic process; single-organism process; carbohydrate metabolic process; primary metabolic process; organic acid metabolic process; cellular metabolic process; cellular process; oxoacid metabolic process; organic substance metabo…	intracellular part; cell; cell part; intracellular; cytoplasm;	oxidoreductase activity, acting on CH-OH group of donors; lactate dehydrogenase activity; oxidoreductase activity, acting on the CH-OH group of donors, NAD or NADP as acceptor; L-lactate dehydrogenase activity; catalytic activity; oxidoreductase activity;	K00016	LDH; L-lactate dehydrogenase [EC:1.1.1.27]	ko00270 Cysteine and methionine metabolism; ko01120 Microbial metabolism in diverse environments; ko01130 Biosynthesis of antibiotics; ko00010 Glycolysis / Gluconeogenesis; ko01110 Biosynthesis of secondary metabolites; ko04922 Glucagon signaling pathway; ko01100 Metabolic pathways; ko00620 Pyruvate metabolism; ko00640 Propanoate metabolism;	IPR022383; IPR016040; IPR001236; IPR023753; IPR015955;	Lactate/malate dehydrogenase, C-terminal; NAD(P)-binding domain; Lactate/malate dehydrogenase, N-terminal; FAD/NAD(P)-binding domain; Lactate dehydrogenase/glycoside hydrolase, family 4, C-terminal;
CL14738Contig2_orf1	lacunin	23.905	0.817034	0.832804	1.38965	1.33716	1.23342	1.01696	0.77478	0.755192	0.769058	0.889058	0.720903	0.961324	extracellular
CL1476Contig1_orf1	uncharacterized protein LOC660773	78.432													endoplasmic reticulum, mitochondria				K18190
CL1485Contig1_orf1	60S ribosomal protein L15	24.554	1.09348	0.965765	1.09811	1.16608	1.15069	1.0429	0.780636	0.820983	0.856067	0.831651	0.86356	0.966921	nuclear	cellular protein metabolic process; biosynthetic process; primary metabolic process; cellular metabolic process; organic substance biosynthetic process; cellular biosynthetic process; organic substance metabolic process; metabolic process; cellular macromolecule biosynthetic process; cellular macromolecule metabolic process; gene expression; macromolecule metabolic process; protein metabolic proc…	ribosome; organelle; intracellular organelle; intracellular non-membrane-bounded organelle; cell part; intracellular; cytoplasm; macromolecular complex; intracellular part; cell; ribonucleoprotein complex; cytoplasmic part; non-membrane-bounded organelle;	structural constituent of ribosome; structural molecule activity;	K02877	RP-L15e; large subunit ribosomal protein L15e	ko03010 Ribosome;	IPR012678; IPR024794;	Ribosomal protein L23/L15e core domain; Ribosomal protein L15e core domain;
CL14905Contig1_orf1	carboxypeptidase B-like	49.744	1.27765	1.38367	0.729945	0.584002	1.0452	1.0182	0.947815	0.897994	1.02397	1.27949	1.05629	0.985344	mitochondria	proteolysis; metabolic process; macromolecule metabolic process; protein metabolic process; primary metabolic process; organic substance metabolic process;		carboxypeptidase activity; peptidase activity; exopeptidase activity; metalloexopeptidase activity; ion binding; metallopeptidase activity; hydrolase activity; zinc ion binding; transition metal ion binding; metallocarboxypeptidase activity; catalytic activity; binding; metal ion binding; peptidase activity, acting on L-amino acid peptides; cation binding;				IPR003146; IPR000834; IPR009020;	Carboxypeptidase, activation peptide; Peptidase M14, carboxypeptidase A; Proteinase propeptide inhibitor;
CL1491Contig1_orf1	protein kish-A	8.311	0.944411	0.894715	1.07034	1.08829	0.991684	0.944216	0.938011	0.929014	0.955194	0.933913	1.06666	1.20321	extracellular
CL14945Contig2_orf1	Kunitz-type serine protease inhibitor	10.802	0.709327	0.625036	1.39681	1.58172	1.1924	1.32979	0.936311	0.672217	0.75993	0.612007	0.746056	0.652591	extracellular			serine-type endopeptidase inhibitor activity; enzyme regulator activity; peptidase inhibitor activity; peptidase regulator activity; endopeptidase regulator activity; enzyme inhibitor activity; molecular function regulator; endopeptidase inhibitor activity;				IPR002223;	Pancreatic trypsin inhibitor Kunitz domain;
CL1498Contig3_orf1	estrogen sulfotransferase	40.561	0.661922	0.791005	0.464374	1.25396	1.18459	1.08009	1.6361	0.917102	1.02825	0.76532	1.27003	0.800259	extracellular			sulfotransferase activity; transferase activity, transferring sulfur-containing groups; catalytic activity; transferase activity;				IPR000863; IPR027417;	Sulfotransferase domain; P-loop containing nucleoside triphosphate hydrolase;
CL14Contig13_orf1	LIM domain-binding protein 3	49.297	0.758914		1.42664		1.34989		0.678793		0.793955		0.69217		nuclear			cation binding; metal ion binding; zinc ion binding; transition metal ion binding; binding; ion binding;	K19867			IPR001781;	Zinc finger, LIM-type;
CL1519Contig5_orf1	hypothetical protein X975_22596, partial	39.903	0.735481	0.657244	1.17968	0.966983	0.965946	1.413	0.817366	0.681053	1.01895	0.891051	1.21387	1.37266	plasma membrane
CL152Contig2_orf1	kinesin-like protein KIF20B	210.21		0.642211		1.54172		1.40815		0.405312		0.771428		0.638217	nuclear	single-organism cellular process; microtubule-based movement; movement of cell or subcellular component; single-organism process; cellular process; microtubule-based process;		motor activity; nucleoside phosphate binding; hydrolase activity, acting on acid anhydrides; protein binding; hydrolase activity; organic cyclic compound binding; heterocyclic compound binding; cytoskeletal protein binding; pyrophosphatase activity; catalytic activity; ribonucleotide binding; microtubule binding; binding; purine ribonucleoside binding; anion binding; adenyl ribonucleotide binding…	K17387	KIF23; kinesin family member 23	ko05206 MicroRNAs in cancer;	IPR027417; IPR001752;	P-loop containing nucleoside triphosphate hydrolase; Kinesin motor domain;
CL15303Contig1_orf1	hypothetical protein LOTGIDRAFT_234449	23.776	1.1148		1.03956		0.669786		1.41093		0.967582		0.95153		mitochondria				K00181	PORCN; O-palmitoleoyl transferase [EC:2.3.1.250]	ko04310 Wnt signaling pathway;
CL1531Contig3_orf1	neuropathy target esterase sws isoform X3	143.28		0.887295		1.27864		1.2093		0.747398		0.790015		0.778344	plasma membrane	cellular amine metabolic process; phosphatidylcholine metabolic process; glycerolipid metabolic process; organic hydroxy compound metabolic process; alcohol metabolic process; small molecule metabolic process; single-organism cellular process; single-organism process; nitrogen compound metabolic process; ammonium ion metabolic process; cellular lipid metabolic process; primary metabolic process; …		lysophospholipase activity; phospholipase activity; hydrolase activity; carboxylic ester hydrolase activity; lipase activity; catalytic activity; hydrolase activity, acting on ester bonds;	K14676	NTE; lysophospholipid hydrolase [EC:3.1.1.5]	ko00564 Glycerophospholipid metabolism;	IPR000595; IPR016035; IPR018490; IPR002641; IPR014710;	Cyclic nucleotide-binding domain; Acyl transferase/acyl hydrolase/lysophospholipase; Cyclic nucleotide-binding-like; Patatin/Phospholipase A2-related; RmlC-like jelly roll fold;
CL1539Contig4_orf1	protein RER1	23.526	0.820458	0.842782	0.995996	0.985639	0.923125	1.07403	1.03255	0.857905	0.99954	1.16697	1.27477	0.871179	plasma membrane		intrinsic component of membrane; membrane; integral component of membrane; membrane part;
CL15415Contig1_orf1	hypothetical protein DAPPUDRAFT_306210	40.903	0.932914	0.934169	0.789886	0.791932	1.04435	1.03433	1.12887	1.14531	0.849447	0.948497	1.35377	1.32327	cytosol	single-organism process; metabolic process; primary metabolic process; single-organism metabolic process; lipid metabolic process; organic substance metabolic process;	organelle; intracellular membrane-bounded organelle; intracellular organelle; cell part; intracellular; lysosome; cytoplasm; vacuole; intracellular part; cell; membrane-bounded organelle; cytoplasmic part; lytic vacuole;		K12348	ASAH1; acid ceramidase [EC:3.5.1.23]	ko00600 Sphingolipid metabolism; ko01100 Metabolic pathways; ko04071 Sphingolipid signaling pathway; ko04142 Lysosome;	IPR029130; IPR029132;	Acid ceramidase, N-terminal; Choloylglycine hydrolase/NAAA C-terminal;
CL1550Contig1_orf1	hypothetical protein CAPTEDRAFT_192408	118.58													nuclear							IPR007111; IPR027417;	NACHT nucleoside triphosphatase; P-loop containing nucleoside triphosphate hydrolase;
CL1550Contig5_orf1	hypothetical protein BRAFLDRAFT_77770	119.91	1.00776		0.823578		1.22302		0.930158		1.28162		0.7285		nuclear							IPR007111; IPR027417;	NACHT nucleoside triphosphatase; P-loop containing nucleoside triphosphate hydrolase;
CL1554Contig1_orf1	Rap1 GTPase-GDP dissociation stimulator 1-B	66.617	0.703809		1.38097		1.30601		0.794177		0.779371		0.723052		plasma membrane			protein binding; binding;				IPR011989; IPR016024;	Armadillo-like helical; Armadillo-type fold;
CL1569Contig1_orf1	putative cation-transporting ATPase 13A3	141.53													plasma membrane	transport; single-organism localization; cation transport; ion transport; single-organism process; localization; establishment of localization; single-organism transport;	intrinsic component of membrane; membrane; integral component of membrane; membrane part;	nucleoside phosphate binding; ion binding; hydrolase activity, acting on acid anhydrides; hydrolase activity; nucleotide binding; nucleoside-triphosphatase activity; ATPase activity; heterocyclic compound binding; organic cyclic compound binding; pyrophosphatase activity; catalytic activity; binding; metal ion binding; cation binding; hydrolase activity, acting on acid anhydrides, in phosphorus-c…	K14951			IPR008250; IPR023299; IPR023214;	P-type ATPase, A domain; P-type ATPase, cytoplasmic domain N; HAD-like domain;
CL1575Contig1_orf1	beta-1,3-glucan-binding protein precursor	275.63	1.07251	0.982658	0.657849	0.822588	1.88386	1.51595	0.979031	1.01742	0.53459	0.767304	0.622866	0.775502	cytosol
CL15763Contig1_orf1	hypothetical protein CAPTEDRAFT_161168	16.236	1.0024		0.920325		0.844369		1.27842		0.915099		1.16258		cytosol				K16473
CL15825Contig1_orf1	hypothetical protein BRAFLDRAFT_115732	75.734	1.01449	1.04111	0.939176	0.812862	1.53577	1.24573	0.654335	0.822279	0.896972	1.00169	0.727461	0.9013	plasma membrane	transport; transmembrane transport; single-organism localization; single-organism cellular process; single-organism process; localization; cellular process; single-organism transport; establishment of localization;	intrinsic component of membrane; membrane; integral component of membrane; membrane part;	nucleoside phosphate binding; primary active transmembrane transporter activity; hydrolase activity, acting on acid anhydrides; hydrolase activity; ATPase activity; organic cyclic compound binding; heterocyclic compound binding; pyrophosphatase activity; catalytic activity; ribonucleotide binding; ATPase activity, coupled to movement of substances; binding; purine ribonucleoside binding; hydrolas…	K05677	ABCD3; ATP-binding cassette, subfamily D (ALD), member 3	ko04146 Peroxisome; ko02010 ABC transporters;	IPR003593; IPR003439; IPR011527; IPR027417;	AAA+ ATPase domain; ABC transporter-like; ABC transporter type 1, transmembrane domain; P-loop containing nucleoside triphosphate hydrolase;
CL1589Contig4_orf1	E3 ubiquitin-protein ligase hyd	300.03													plasma membrane			RNA binding; ubiquitin-like protein transferase activity; ion binding; protein binding; zinc ion binding; ubiquitin-like protein binding; heterocyclic compound binding; organic cyclic compound binding; transition metal ion binding; catalytic activity; binding; nucleic acid binding; ubiquitin-protein transferase activity; ubiquitin binding; metal ion binding; cation binding; transferase activity;	K10593	EDD1; E3 ubiquitin-protein ligase EDD1 [EC:2.3.2.26]	ko04120 Ubiquitin mediated proteolysis;	IPR002004; IPR015940; IPR009091; IPR024725; IPR000569; IPR003126;	Polyadenylate-binding protein/Hyperplastic disc protein; Ubiquitin-associated domain; Regulator of chromosome condensation 1/beta-lactamase-inhibitor protein II; E3 ubiquitin ligase EDD, ubiquitin-associated domain; HECT domain; Zinc finger, UBR-type;
CL158Contig10_orf1	hypothetical protein L798_02839	46.781	0.89756	0.896382	1.1846	1.16193	1.19076	1.2054	0.724415	0.856761	0.757279	0.727145	0.942217	0.888694	plasma membrane
CL15Contig37_orf1	Parp12a protein	113.4	1.05779		1.00394		0.89259		0.402843		1.17169		1.45819		nuclear			transferase activity, transferring pentosyl groups; transferase activity, transferring glycosyl groups; NAD+ ADP-ribosyltransferase activity; catalytic activity; transferase activity;	K15259			IPR004170; IPR012317;	WWE domain; Poly(ADP-ribose) polymerase, catalytic domain;
CL16055Contig1_orf1	alpha-2-macroglobulin	52.852	0.676304	0.858476	1.09982	0.96724	0.984448	0.883036	1.03102	1.08745	0.943238	1.12143	1.24487	1.21104	nuclear			enzyme regulator activity; peptidase inhibitor activity; peptidase regulator activity; endopeptidase regulator activity; molecular function regulator; enzyme inhibitor activity; endopeptidase inhibitor activity;				IPR011625; IPR001599;	Alpha-2-macroglobulin, N-terminal 2; Alpha-2-macroglobulin;
CL16109Contig1_orf1	C-type lectin	39.38	0.338169	0.4777	1.14327	1.08348	2.6529	2.25462	0.340513	0.405168	0.293109	0.410074	0.462239	0.511128	nuclear							IPR001304; IPR016187; IPR016186;	C-type lectin-like; C-type lectin fold; C-type lectin-like/link domain;
CL16182Contig1_orf1	rho guanine nucleotide exchange factor 18 isoform X4	71.435													cytosol	regulation of cellular process; regulation of biological process; regulation of cell communication; regulation of intracellular signal transduction; regulation of signaling; regulation of response to stimulus; regulation of Ras protein signal transduction; regulation of Rho protein signal transduction; regulation of signal transduction; regulation of small GTPase mediated signal transduction; bio…		Ras guanyl-nucleotide exchange factor activity; molecular function regulator; guanyl-nucleotide exchange factor activity; Rho guanyl-nucleotide exchange factor activity;	K16529			IPR011993; IPR000219; IPR001849;	PH domain-like; Dbl homology (DH) domain; Pleckstrin homology domain;
CL16184Contig1_orf1	Maltase 1, partial	69.428	0.864916	0.792752	0.571979	0.763291	1.61981	1.52052	0.960522	0.999707	0.650074	0.625755	1.36951	1.12606	endoplasmic reticulum, Golgi apparatus	metabolic process; carbohydrate metabolic process; primary metabolic process; organic substance metabolic process;		catalytic activity;	K01187	malZ; alpha-glucosidase [EC:3.2.1.20]	ko00500 Starch and sucrose metabolism; ko00052 Galactose metabolism; ko01100 Metabolic pathways;	IPR017853; IPR013781; IPR006047;	Glycoside hydrolase superfamily; Glycoside hydrolase, catalytic domain; Glycosyl hydrolase, family 13, catalytic domain;
CL16190Contig1_orf1	AGAP010005-PA-like protein	71.389	0.827233	0.830833	1.19035	1.07003	1.25026	1.00397	0.850626	1.06982	0.623469	0.746567	0.812058	0.835906	plasma membrane
CL1619Contig3_orf1	14-3-3 protein	7.4394	0.606339		1.60435		1.66667		0.40488		0.512952		0.593368		cytosol			protein domain specific binding; protein binding; binding;				IPR023410;	14-3-3 domain;
CL1619Contig4_orf1	14-3-3-like protein	28.928	0.803767	0.738643	1.24102	1.29767	1.8089	1.74259	0.568489	0.483187	0.654092	0.555887	0.468644	0.417876	cytosol			protein domain specific binding; protein binding; binding;	K16197	YWHAB_Q_Z; 14-3-3 protein beta/theta/zeta	ko04212 Longevity regulating pathway - worm; ko04110 Cell cycle; ko04391 Hippo signaling pathway - fly; ko05203 Viral carcinogenesis; ko05161 Hepatitis B; ko04390 Hippo signaling pathway; ko04151 PI3K-Akt signaling pathway; ko04013 MAPK signaling pathway - fly; ko04114 Oocyte meiosis; ko05169 Epstein-Barr virus infection;	IPR023410;	14-3-3 domain;
CL16323Contig1_orf1	VWA domain CoxE-like protein	115.81													nuclear							IPR002035;	von Willebrand factor, type A;
CL16325Contig1_orf1	hypothetical protein X975_17052, partial	12.13	1.00985		1.32584		1.08838		0.872297		0.676575		0.814124		plasma membrane
CL16345Contig1_orf1	hypothetical protein DAPPUDRAFT_213033	30.354	0.943327		1.52917		0.753976		0.894702		0.85199		0.879404		cytosol, nuclear	cell adhesion; biological adhesion;	extracellular region;	cation binding; metal ion binding; calcium ion binding; binding; ion binding;	K04659	THBS2S; thrombospondin 2/3/4/5	ko05144 Malaria; ko04512 ECM-receptor interaction; ko04510 Focal adhesion; ko04145 Phagosome; ko04151 PI3K-Akt signaling pathway;	IPR008859; IPR013320;	Thrombospondin, C-terminal; Concanavalin A-like lectin/glucanase domain;
CL1634Contig1_orf1	organic cation transporter protein	67.81													plasma membrane	transport; transmembrane transport; single-organism localization; single-organism cellular process; single-organism process; localization; cellular process; single-organism transport; establishment of localization;	intrinsic component of membrane; membrane; integral component of membrane; membrane part;	transmembrane transporter activity; transporter activity;	K08202	SLC22A4_5; MFS transporter, OCT family, solute carrier family 22 (organic cation transporter), member 4/5	ko05231 Choline metabolism in cancer;	IPR020846;	Major facilitator superfamily domain;
CL16384Contig1_orf1	putative hydroxypyruvate isomerase	22.826													cytosol				K01816	hyi; hydroxypyruvate isomerase [EC:5.3.1.22]	ko01100 Metabolic pathways; ko00630 Glyoxylate and dicarboxylate metabolism;	IPR013022;	Xylose isomerase-like, TIM barrel domain;
CL1638Contig2_orf1	lectin B isoform 2	60.377		0.36942		0.335732		0.328537		4.01362		1.85607		0.412576	nuclear							IPR001304; IPR016187; IPR016186;	C-type lectin-like; C-type lectin fold; C-type lectin-like/link domain;
CL16395Contig1_orf1	innexin inx3	43.719													plasma membrane		gap junction; cell-cell junction; cell junction;
CL1639Contig2_orf2	hepatocyte growth factor-regulated tyrosine kinase substrate isoform X2	25.723		0.850484		0.94745		1.16994		1.13073		0.876724		0.985175	extracellular	establishment of protein localization; transport; intracellular transport; cellular macromolecule localization; establishment of localization in cell; intracellular protein transport; organic substance transport; protein localization; macromolecule localization; cellular protein localization; localization; protein transport; establishment of localization; cellular localization;		metal ion binding; cation binding; binding; ion binding;	K12182	HGS; hepatocyte growth factor-regulated tyrosine kinase substrate	ko04145 Phagosome; ko04144 Endocytosis;	IPR002014; IPR000306; IPR017455; IPR013083; IPR011011; IPR008942;	VHS domain; FYVE zinc finger; Zinc finger, FYVE-related; Zinc finger, RING/FYVE/PHD-type; Zinc finger, FYVE/PHD-type; ENTH/VHS;
CL16402Contig1_orf1	hypothetical protein ZHAS_00007239	29.576	0.852658	0.862351	1.27679	1.17263	1.40415	1.31607	0.684195	0.802161	0.750733	0.775845	0.702738	0.763792	nuclear			cation binding; metal ion binding; zinc ion binding; transition metal ion binding; binding; ion binding;	K16676	LPP; lipoma-prefererred partner	ko04391 Hippo signaling pathway - fly;	IPR001781;	Zinc finger, LIM-type;
CL16437Contig1_orf1	carboxypeptidase B-like	54.024	1.0614	1.07529	0.813753	0.755348	0.900469	0.788323	1.24399	1.40208	1.10496	1.26289	1.02697	1.03365	plasma membrane	proteolysis; metabolic process; macromolecule metabolic process; protein metabolic process; primary metabolic process; organic substance metabolic process;		carboxypeptidase activity; peptidase activity; exopeptidase activity; metalloexopeptidase activity; ion binding; metallopeptidase activity; hydrolase activity; zinc ion binding; transition metal ion binding; metallocarboxypeptidase activity; catalytic activity; binding; metal ion binding; peptidase activity, acting on L-amino acid peptides; cation binding;				IPR003146; IPR000834; IPR009020;	Carboxypeptidase, activation peptide; Peptidase M14, carboxypeptidase A; Proteinase propeptide inhibitor;
CL16522Contig1_orf1	Hypoxia up-regulated protein 1	108.24	0.866537		1.10413		1.01642		0.985969		0.846798		1.12402		plasma membrane				K09486	HYOU1; hypoxia up-regulated 1	ko04141 Protein processing in endoplasmic reticulum;	IPR029048; IPR029047;	Heat shock protein 70kD, C-terminal domain; Heat shock protein 70kD, peptide-binding domain;
CL1653Contig1_orf1	hypothetical protein BRAFLDRAFT_122922	75.332	1.05485		0.828048		0.97986		1.08632		1.05927		1.0851		cytosol	single-organism process; metabolic process; oxidation-reduction process; single-organism metabolic process;		oxidoreductase activity, acting on NAD(P)H; nucleoside phosphate binding; oxidoreductase activity, acting on NAD(P)H, heme protein as acceptor; ion binding; nucleotide binding; cofactor binding; oxidoreductase activity; NADPH-hemoprotein reductase activity; heterocyclic compound binding; organic cyclic compound binding; carbohydrate derivative binding; catalytic activity; ribonucleotide binding; …				IPR017927; IPR008254; IPR029039; IPR001433; IPR017938; IPR003097; IPR023173; IPR001709;	Ferredoxin reductase-type FAD-binding domain; Flavodoxin/nitric oxide synthase; Flavoprotein-like domain; Oxidoreductase FAD/NAD(P)-binding; Riboflavin synthase-like beta-barrel; FAD-binding, type 1; NADPH-cytochrome p450 reductase, FAD-binding, alpha-helical domain-3; Flavoprotein pyridine nucleotide cytochrome reductase;
CL16554Contig1_orf1	crustacyanin subunit C	22.676	0.681211	0.737123	1.87907	1.94323	1.30043	1.09377	0.358857	0.403774	0.692601	0.631503	0.509292	0.559398	extracellular			pigment binding; binding;				IPR012674; IPR000566; IPR011038;	Calycin; Lipocalin/cytosolic fatty-acid binding domain; Calycin-like;
CL16564Contig1_orf1	mitochondrial carnitine/acylcarnitine carrier protein	32.238	0.970419	0.933541	0.891839	0.927862	1.11903	1.11804	1.02269	0.96032	0.999047	1.00398	0.941304	0.976144	mitochondria	transport; transmembrane transport; single-organism localization; single-organism cellular process; single-organism process; localization; cellular process; single-organism transport; establishment of localization;			K15109			IPR023395;	Mitochondrial carrier domain;
CL165Contig3_orf1	threonine synthase-like 2	53.777		0.688176		0.974116		0.54635		1.01999		1.99877		1.13581	nuclear							IPR001926; IPR029144;	Tryptophan synthase beta subunit-like PLP-dependent enzyme; Threonine synthase, N-terminal;
CL1666Contig2_orf1	salivary alkaline phosphatase	66.251	0.931798	0.896514	0.887029	0.8971	2.06006	2.07346	0.484179	0.465327	0.612584	0.561798	0.561206	0.502469	plasma membrane	metabolic process;		hydrolase activity; phosphoric ester hydrolase activity; catalytic activity; phosphatase activity; hydrolase activity, acting on ester bonds;	K01077	E3.1.3.1; alkaline phosphatase [EC:3.1.3.1]	ko00790 Folate biosynthesis; ko01120 Microbial metabolism in diverse environments; ko01100 Metabolic pathways; ko00627 Aminobenzoate degradation; ko00730 Thiamine metabolism; ko02020 Two-component system;	IPR017849; IPR017850;	Alkaline phosphatase-like, alpha/beta/alpha; Alkaline-phosphatase-like, core domain;
CL1668Contig3_orf1	hypothetical protein BRAFLDRAFT_90953	34.961		0.843386		1.40077		1.10065		0.787061		0.774607		0.798331	nuclear	phosphorylation; single-organism process; carbohydrate metabolic process; primary metabolic process; cellular metabolic process; phosphate-containing compound metabolic process; organic substance metabolic process; single-organism carbohydrate metabolic process; metabolic process; cellular carbohydrate metabolic process; phosphorus metabolic process; single-organism metabolic process; carbohydrat…	intracellular part; cell; cell part; intracellular; cytoplasm;	ATP binding; nucleoside phosphate binding; phosphotransferase activity, alcohol group as acceptor; nucleoside binding; ion binding; nucleotide binding; organic cyclic compound binding; heterocyclic compound binding; ribonucleoside binding; carbohydrate kinase activity; carbohydrate derivative binding; kinase activity; catalytic activity; ribonucleotide binding; binding; purine ribonucleoside bind…	K00849	galK; galactokinase [EC:2.7.1.6]	ko00052 Galactose metabolism; ko01100 Metabolic pathways; ko00520 Amino sugar and nucleotide sugar metabolism;	IPR019539; IPR020568; IPR006204; IPR014721; IPR013750;	Galactokinase galactose-binding domain; Ribosomal protein S5 domain 2-type fold; GHMP kinase N-terminal domain; Ribosomal protein S5 domain 2-type fold, subgroup; GHMP kinase, C-terminal domain;
CL1668Contig4_orf1	probable prefoldin subunit 5	18.91		0.882079		1.06702		1.43463		0.581351		0.827179		0.850655	cytosol	protein folding; metabolic process; cellular protein metabolic process; cellular macromolecule metabolic process; macromolecule metabolic process; protein metabolic process; primary metabolic process; cellular process; cellular metabolic process; organic substance metabolic process;	prefoldin complex; macromolecular complex; protein complex;	protein binding; unfolded protein binding; binding;	K04797
CL1669Contig2_orf1	hypothetical protein DAPPUDRAFT_328004	56.083	0.86909	0.741518	1.23247	1.16466	0.825202	0.904967	0.85515	1.08045	0.987302	0.996498	0.994557	1.13249	plasma membrane	transport; transmembrane transport; single-organism localization; single-organism cellular process; single-organism process; localization; cellular process; single-organism transport; establishment of localization;	intrinsic component of membrane; membrane; integral component of membrane; membrane part;		K20840			IPR020846;	Major facilitator superfamily domain;
CL16804Contig1_orf1	Neural cell adhesion molecule 1, partial	23.047	0.682309	0.530826	1.78403	1.62894	1.5042	1.73332	0.471577	0.389821	0.428646	0.456039	0.503986	0.423195	extracellular			protein binding; binding;	K08653	MBTPS1; membrane-bound transcription factor site-1 protease [EC:3.4.21.112]	ko04141 Protein processing in endoplasmic reticulum;	IPR007110; IPR013783; IPR003599; IPR013151;	Immunoglobulin-like domain; Immunoglobulin-like fold; Immunoglobulin subtype; Immunoglobulin;
CL16832Contig1_orf1	xanthine dehydrogenase	12.198	0.959772		0.928321		0.685462		1.21837		1.34526		1.07024		cytosol	single-organism process; metabolic process; oxidation-reduction process; single-organism metabolic process;		catalytic activity; oxidoreductase activity;				IPR008274;	Aldehyde oxidase/xanthine dehydrogenase, molybdopterin binding;
CL1695Contig1_orf1	pacifastin light chain precursor	143.97	0.59963	0.465408	0.961782	0.941012	1.17066	1.26741	0.587039	0.437112	2.08251	2.14379	0.645231	0.617874	extracellular			serine-type endopeptidase inhibitor activity; enzyme regulator activity; binding; peptidase inhibitor activity; peptidase regulator activity; protein binding; endopeptidase regulator activity; molecular function regulator; enzyme inhibitor activity; endopeptidase inhibitor activity;				IPR008037; IPR004094; IPR001007; IPR002223;	Pacifastin domain; Antistasin-like domain; VWFC domain; Pancreatic trypsin inhibitor Kunitz domain;
CL1695Contig2_orf1	pacifastin light chain precursor	144.61													mitochondria			serine-type endopeptidase inhibitor activity; enzyme regulator activity; binding; peptidase inhibitor activity; peptidase regulator activity; protein binding; endopeptidase regulator activity; molecular function regulator; enzyme inhibitor activity; endopeptidase inhibitor activity;				IPR004094; IPR008037; IPR001007; IPR002223;	Antistasin-like domain; Pacifastin domain; VWFC domain; Pancreatic trypsin inhibitor Kunitz domain;
CL1695Contig3_orf1	pacifastin light chain precursor	140.05		0.695108		1.08096		1.07427		0.780811		1.50858		0.786993	plasma membrane			serine-type endopeptidase inhibitor activity; enzyme regulator activity; binding; peptidase inhibitor activity; peptidase regulator activity; protein binding; endopeptidase regulator activity; molecular function regulator; enzyme inhibitor activity; endopeptidase inhibitor activity;				IPR004094; IPR008037; IPR001007; IPR002223;	Antistasin-like domain; Pacifastin domain; VWFC domain; Pancreatic trypsin inhibitor Kunitz domain;
CL16Contig5_orf1	CCAAT/enhancer-binding protein zeta isoform X2	124.29	1.11988	1.15138	1.26278	1.19321	1.17206	1.10526	0.618421	0.586483	0.790742	0.903434	0.790599	0.803509	cytosol			binding;	K14832			IPR011989; IPR005612; IPR016024;	Armadillo-like helical; CCAAT-binding factor; Armadillo-type fold;
CL1720Contig1_orf1	syntenin	35.478	1.02282	1.02527	0.90495	0.848988	0.879429	0.959012	0.955978	0.90588	1.12134	1.22959	1.1022	1.1385	cytosol			protein binding; binding;	K17254			IPR001478;	PDZ domain;
CL17266Contig1_orf1	AGAP000535-PA-like protein	79.456	1.15253	1.35496	0.738586	0.743434	1.1384	1.49225	1.03649	0.826311	0.894612	0.753141	1.15402	0.575439	plasma membrane			transferase activity, transferring acyl groups; transferase activity, transferring acyl groups other than amino-acyl groups; catalytic activity; transferase activity;				IPR002656; IPR006621;	Acyltransferase 3; Nose resistant-to-fluoxetine protein, N-terminal;
CL1731Contig1_orf1	NAD-dependent deacetylase sirtuin-2	38.98		0.64338		1.50956		1.25596		0.7568		0.705975		0.698802	cytosol	cellular protein metabolic process; primary metabolic process; cellular metabolic process; organic substance metabolic process; metabolic process; protein deacylation; cellular macromolecule metabolic process; cellular protein modification process; protein metabolic process; macromolecule metabolic process; protein modification process; macromolecule modification; cellular process; macromolecule …		nucleoside phosphate binding; ion binding; hydrolase activity; NAD+ binding; nucleotide binding; zinc ion binding; cofactor binding; heterocyclic compound binding; organic cyclic compound binding; transition metal ion binding; NAD binding; catalytic activity; binding; cation binding; metal ion binding; anion binding; hydrolase activity, acting on carbon-nitrogen (but not peptide) bonds, in linear…	K11412			IPR029035; IPR026590; IPR026591;	DHS-like NAD/FAD-binding domain; Sirtuin family, catalytic core domain; Sirtuin family, catalytic core small domain;
CL17366Contig1_orf1	alpha 2 macroglobulin	22.13	0.909114	0.796346	1.11754	1.46197	0.921922	1.08527	1.16518	1.01179	0.990397	0.825242	0.833742	0.537495	nuclear							IPR011625;	Alpha-2-macroglobulin, N-terminal 2;
CL17368Contig1_orf1	delta-6 desaturase-like protein	39.025	1.23826		0.894588		0.837208		0.947352		1.1648		1.04753		plasma membrane	single-organism process; metabolic process; primary metabolic process; single-organism metabolic process; lipid metabolic process; organic substance metabolic process;						IPR005804;	Fatty acid desaturase domain;
CL17431Contig1_orf1	Trypsin	30.297	1.10434	1.09838	0.692923	0.759257	0.854489	0.857858	1.29883	1.19399	0.944998	0.907582	1.29364	1.19883	extracellular	proteolysis; metabolic process; macromolecule metabolic process; protein metabolic process; primary metabolic process; organic substance metabolic process;		serine-type endopeptidase activity; endopeptidase activity; peptidase activity; catalytic activity; serine hydrolase activity; serine-type peptidase activity; peptidase activity, acting on L-amino acid peptides; hydrolase activity;	K01312	PRSS1_2_3; trypsin [EC:3.4.21.4]	ko04080 Neuroactive ligand-receptor interaction; ko04972 Pancreatic secretion; ko05164 Influenza A; ko04974 Protein digestion and absorption;	IPR009003; IPR001254;	Peptidase S1, PA clan; Serine proteases, trypsin domain;
CL17467Contig1_orf1	microsomal prostaglandin E synthase	16.875	0.78528	0.443598	1.28766	1.48696	1.25237	1.72407	0.801049	0.420256	0.862909	0.717954	0.767307	0.473894	plasma membrane				K00799	GST; glutathione S-transferase [EC:2.5.1.18]	ko00980 Metabolism of xenobiotics by cytochrome P450; ko00982 Drug metabolism - cytochrome P450; ko00480 Glutathione metabolism; ko05204 Chemical carcinogenesis; ko01524 Platinum drug resistance;	IPR023352;	Membrane associated eicosanoid/glutathione metabolism-like domain;
CL1751Contig1_orf1	conserved hypothetical protein	46.456	1.12616		1.0803		1.4408		0.650755		0.674284		0.747209		cytosol							IPR000195;	Rab-GTPase-TBC domain;
CL17523Contig1_orf1	hypothetical protein DAPPUDRAFT_202914	16.969	0.71434	0.584586	1.38439	1.46422	1.27862	1.29862	0.672687	0.662297	0.629934	0.484896	0.994748	1.06974	cytosol	nucleoside metabolic process; pyrimidine nucleoside catabolic process; cellular aromatic compound metabolic process; single-organism process; cellular metabolic process; organic substance metabolic process; cellular nitrogen compound catabolic process; ribonucleoside catabolic process; metabolic process; heterocycle metabolic process; pyrimidine nucleoside metabolic process; nucleobase-containing…		hydrolase activity, acting on carbon-nitrogen (but not peptide) bonds, in cyclic amidines; cytidine deaminase activity; transition metal ion binding; catalytic activity; binding; ion binding; cation binding; deaminase activity; metal ion binding; hydrolase activity; zinc ion binding; hydrolase activity, acting on carbon-nitrogen (but not peptide) bonds;	K01489	cdd; cytidine deaminase [EC:3.5.4.5]	ko00983 Drug metabolism - other enzymes; ko01100 Metabolic pathways; ko00240 Pyrimidine metabolism;	IPR016193; IPR002125;	Cytidine deaminase-like; Cytidine and deoxycytidylate deaminases, zinc-binding;
CL1753Contig4_orf1	unknown	25.836	0.953065	0.942969	1.1641	0.974062	0.860001	0.883653	0.982382	0.990915	1.0725	1.19759	0.958886	1.10911	plasma membrane
CL175Contig3_orf1	hypothetical protein DAPPUDRAFT_304661	355.71	0.863148	0.727725	1.23247	1.25736	1.23862	1.28215	0.806247	0.757258	0.83907	0.748507	0.797157	0.909322	nuclear	transport; lipid transport; single-organism localization; single-organism process; lipid localization; organic substance transport; macromolecule localization; localization; single-organism transport; establishment of localization;		lipid transporter activity; substrate-specific transporter activity; transporter activity;				IPR015816; IPR011030; IPR015819; IPR015817; IPR001747; IPR001846; IPR015255;	Vitellinogen, beta-sheet N-terminal; Vitellinogen, superhelical; Lipid transport protein, beta-sheet shell; Vitellinogen, open beta-sheet, subdomain 1; Lipid transport protein, N-terminal; von Willebrand factor, type D domain; Vitellinogen, open beta-sheet;
CL17613Contig2_orf1	Alcohol dehydrogenase class-3, partial	41.663	0.893522	0.891619	1.50807	1.23148	1.42109	1.48198	0.49276	0.829477	0.625902	0.701816	0.604562	0.758501	cytosol	ethanol oxidation; metabolic process; organic hydroxy compound metabolic process; single-organism metabolic process; alcohol metabolic process; oxidation-reduction process; small molecule metabolic process; ethanol metabolic process; single-organism process; primary alcohol metabolic process; organic substance metabolic process;		oxidoreductase activity, acting on CH-OH group of donors; oxidoreductase activity, acting on the CH-OH group of donors, NAD or NADP as acceptor; transition metal ion binding; catalytic activity; binding; ion binding; metal ion binding; cation binding; zinc ion binding; S-(hydroxymethyl)glutathione dehydrogenase activity; oxidoreductase activity;	K00121	frmA; S-(hydroxymethyl)glutathione dehydrogenase / alcohol dehydrogenase [EC:1.1.1.284 1.1.1.1]	ko00830 Retinol metabolism; ko01130 Biosynthesis of antibiotics; ko00071 Fatty acid degradation; ko01110 Biosynthesis of secondary metabolites; ko01100 Metabolic pathways; ko05204 Chemical carcinogenesis; ko00350 Tyrosine metabolism; ko00680 Methane metabolism; ko00980 Metabolism of xenobiotics by cytochrome P450; ko01120 Microbial metabolism in diverse environments; ko01200 Carbon metabolism; ko…	IPR011032; IPR016040; IPR013154; IPR013149;	GroES-like; NAD(P)-binding domain; Alcohol dehydrogenase, N-terminal; Alcohol dehydrogenase, C-terminal;
CL17644Contig1_orf1	catalase	59.237	1.01209	1.0262	1.01314	0.83479	0.902773	0.868945	0.914771	1.25026	0.932013	0.93539	0.873474	0.980218	cytosol	metabolic process; response to stress; oxidation-reduction process; single-organism metabolic process; response to oxidative stress; single-organism process; response to stimulus;		organic cyclic compound binding; heterocyclic compound binding; heme binding; catalytic activity; binding; antioxidant activity; catalase activity; peroxidase activity; tetrapyrrole binding; oxidoreductase activity; oxidoreductase activity, acting on peroxide as acceptor;	K03781	katE; catalase [EC:1.11.1.6]	ko04211 Longevity regulating pathway; ko04212 Longevity regulating pathway - worm; ko01130 Biosynthesis of antibiotics; ko01110 Biosynthesis of secondary metabolites; ko05014 Amyotrophic lateral sclerosis (ALS); ko04016 MAPK signaling pathway - plant; ko00380 Tryptophan metabolism; ko04146 Peroxisome; ko04068 FoxO signaling pathway; ko01200 Carbon metabolism; ko04011 MAPK signaling pathway - yeas…	IPR020835; IPR011614; IPR010582;	Catalase-like domain; Catalase core domain; Catalase immune-responsive domain;
CL17661Contig1_orf1	hypothetical protein DAPPUDRAFT_300823	26.176	0.85802	0.769346	1.61607	1.61921	1.10538	1.16158	0.719802	0.667156	0.623517	0.765508	0.757713	0.679027	extracellular							IPR002049;	Laminin EGF domain;
CL17691Contig1_orf1	thioredoxin domain-containing protein 15	52.62													plasma membrane	regulation of cellular process; homeostatic process; regulation of biological quality; regulation of biological process; cell redox homeostasis; single-organism cellular process; cellular homeostasis; single-organism process; cellular process; biological regulation;						IPR013766; IPR012336;	Thioredoxin domain; Thioredoxin-like fold;
CL17758Contig1_orf1	chitin deacetylase 9 precursor	47.852	0.640968	0.704999	1.37545	1.3085	0.933977	0.919243	0.604065	0.577744	1.30326	1.34992	0.964255	0.910732	extracellular	metabolic process; carbohydrate metabolic process; primary metabolic process; organic substance metabolic process;		hydrolase activity; catalytic activity; hydrolase activity, acting on carbon-nitrogen (but not peptide) bonds;				IPR011330; IPR002509;	Glycoside hydrolase/deacetylase, beta/alpha-barrel; NodB homology domain;
CL177Contig8_orf1	major facilitator superfamily domain-containing protein 12-like isoform X2	32.718		0.89352		0.943415		0.905073		0.973446		1.0291		1.36212	plasma membrane							IPR020846;	Major facilitator superfamily domain;
CL17829Contig1_orf1	Transforming growth factor-beta-induced protein ig-h3	35.946													mitochondria							IPR000782;	FAS1 domain;
CL17857Contig1_orf1	Xanthine dehydrogenase/oxidase, partial	26.341	0.798139	0.80443	1.11968	1.07909	0.478776	0.600273	1.10685	1.03121	1.76516	1.56051	0.962689	1.1755	cytosol, nuclear	single-organism process; metabolic process; oxidation-reduction process; single-organism metabolic process;		nucleoside phosphate binding; flavin adenine dinucleotide binding; ion binding; nucleotide binding; cofactor binding; oxidoreductase activity; oxidoreductase activity, acting on CH-OH group of donors; heterocyclic compound binding; organic cyclic compound binding; catalytic activity; binding; metal ion binding; cation binding; anion binding; small molecule binding; coenzyme binding;				IPR016166; IPR016169; IPR002346; IPR016167; IPR002888;	FAD-binding, type 2; CO dehydrogenase flavoprotein-like, FAD-binding, subdomain 2; Molybdopterin dehydrogenase, FAD-binding; FAD-binding, type 2, subdomain 1; [2Fe-2S]-binding;
CL1792Contig1_orf1	protein FAM115C-like	88.79	0.874153	0.873028	1.32505	1.17479	1.18914	1.04663	0.837665	0.989196	0.681292	0.787546	0.855596	0.996516	cytosol, nuclear							IPR031161; IPR000772;	Peptidase family M60 domain; Ricin B, lectin domain;
CL179Contig4_orf1	laccase 1	75.771	0.694155	0.75098	1.02585	1.04223	1.40665	1.39796	0.804627	0.693023	0.720312	0.684647	1.14787	1.14712	Golgi apparatus	single-organism process; metabolic process; oxidation-reduction process; single-organism metabolic process;		transition metal ion binding; catalytic activity; binding; ion binding; metal ion binding; cation binding; copper ion binding; oxidoreductase activity;				IPR011706; IPR011707; IPR008972; IPR001117;	Multicopper oxidase, type 2; Multicopper oxidase, type 3; Cupredoxin; Multicopper oxidase, type 1;
CL1800Contig2_orf1	palmitoyl-protein thioesterase 1	35.544	0.909631	0.907939	0.685731	0.67784	0.606554	0.588614	1.75871	1.82089	1.1004	1.13858	1.3337	1.36674	mitochondria			palmitoyl hydrolase activity; hydrolase activity; catalytic activity;	K01074	PPT; palmitoyl-protein thioesterase [EC:3.1.2.22]	ko01212 Fatty acid metabolism; ko01100 Metabolic pathways; ko04142 Lysosome; ko00062 Fatty acid elongation;	IPR029058;	Alpha/Beta hydrolase fold;
CL180Contig10_orf1	hypothetical protein NEMVEDRAFT_v1g248679	118.71	1.10317	1.10497	0.799815	0.768508	1.17875	1.05988	0.893167	1.06756	1.0944	1.16411	0.933643	0.919447	plasma membrane							IPR007111; IPR027417;	NACHT nucleoside triphosphatase; P-loop containing nucleoside triphosphate hydrolase;
CL1813Contig3_orf1	protein kinase C, brain isozyme isoform X1	79.864	0.981099	0.99869	1.06478	1.04045	1.22438	1.14437	0.946468	0.947668	0.708045	0.799287	0.88173	0.904601	cytosol, nuclear	regulation of cellular process; single organism signaling; cellular response to stimulus; phosphorylation; intracellular signal transduction; single-organism cellular process; cellular protein metabolic process; single-organism process; signaling; response to stimulus; primary metabolic process; cellular metabolic process; phosphate-containing compound metabolic process; organic substance metabol…		nucleoside phosphate binding; phosphotransferase activity, alcohol group as acceptor; protein binding; protein kinase activity; organic cyclic compound binding; heterocyclic compound binding; kinase activity; catalytic activity; ribonucleotide binding; binding; purine ribonucleoside binding; cation binding; anion binding; adenyl ribonucleotide binding; adenyl nucleotide binding; transferase activ…	K02677	PRKCA; classical protein kinase C alpha type [EC:2.7.11.13]	ko04727 GABAergic synapse; ko04726 Serotonergic synapse; ko04912 GnRH signaling pathway; ko04970 Salivary secretion; ko04650 Natural killer cell mediated cytotoxicity; ko04020 Calcium signaling pathway; ko04971 Gastric acid secretion; ko04666 Fc gamma R-mediated phagocytosis; ko04151 PI3K-Akt signaling pathway; ko04724 Glutamatergic synapse; ko04713 Circadian entrainment; ko05231 Choline metaboli…	IPR002219; IPR000719; IPR000008; IPR020454; IPR000961; IPR011009;	Protein kinase C-like, phorbol ester/diacylglycerol-binding domain; Protein kinase domain; C2 domain; Diacylglycerol/phorbol-ester binding; AGC-kinase, C-terminal; Protein kinase-like domain;
CL1818Contig4_orf1	hypothetical protein LOTGIDRAFT_227971	40.552	0.881674	0.89988	1.25158	1.23355	1.0193	1.12553	0.907379	0.910647	0.794412	0.810651	0.858745	0.872304	cytosol	single-organism process; metabolic process; oxidation-reduction process; single-organism metabolic process;		catalytic activity; oxidoreductase activity;				IPR005123; IPR027443; IPR026992;	Oxoglutarate/iron-dependent dioxygenase; Isopenicillin N synthase-like; Non-haem dioxygenase N-terminal domain;
CL1833Contig3_orf1	ras-related protein Ral-a isoform X2	36.042	0.935648	0.97567	1.13365	0.90522	1.14044	1.13444	1.08155	1.12013	0.909566	0.930876	0.92185	0.96366	cytosol	regulation of cellular process; single organism signaling; cellular response to stimulus; signal transduction; regulation of biological process; cell communication; intracellular signal transduction; single-organism cellular process; single-organism process; small GTPase mediated signal transduction; signaling; response to stimulus; cellular process; biological regulation;	membrane;	nucleoside phosphate binding; nucleoside binding; ion binding; nucleotide binding; organic cyclic compound binding; heterocyclic compound binding; ribonucleoside binding; carbohydrate derivative binding; ribonucleotide binding; binding; purine ribonucleoside binding; anion binding; purine ribonucleotide binding; purine nucleoside binding; guanyl ribonucleotide binding; guanyl nucleotide binding; …	K07834	RALA; Ras-related protein Ral-A	ko05200 Pathways in cancer; ko04015 Rap1 signaling pathway; ko05212 Pancreatic cancer; ko04072 Phospholipase D signaling pathway; ko04014 Ras signaling pathway;	IPR005225; IPR027417;	Small GTP-binding protein domain; P-loop containing nucleoside triphosphate hydrolase;
CL1835Contig1_orf1	uncharacterized protein LOC100635111	149.13	1.12897		0.99997		0.794617		1.24648		1.06005		0.877474		cytosol			protein binding; binding;	K15503			IPR020683;	Ankyrin repeat-containing domain;
CL1838Contig4_orf1	Y+L amino acid transporter 2	54.905	0.970607	0.968238	1.28931	1.13992	1.184	1.1059	0.692066	0.758501	0.78319	0.82386	0.834007	1.02835	plasma membrane	ion transmembrane transport; single-organism cellular process; single-organism process; organic substance transport; carboxylic acid transport; amino acid transmembrane transport; organic acid transport; anion transmembrane transport; establishment of localization; transport; anion transport; transmembrane transport; organic anion transport; single-organism localization; organic acid transmembran…	membrane;	organic acid transmembrane transporter activity; ion transmembrane transporter activity; substrate-specific transporter activity; organic anion transmembrane transporter activity; anion transmembrane transporter activity; carboxylic acid transmembrane transporter activity; substrate-specific transmembrane transporter activity; amino acid transmembrane transporter activity; transporter activity; t…	K03450
CL1860Contig3_orf1	C-type lectin 2	79.652	0.948568		0.783744		0.931642		1.30108		1.07637		1.23656		nuclear							IPR001304; IPR016187; IPR016186;	C-type lectin-like; C-type lectin fold; C-type lectin-like/link domain;
CL18639Contig1_orf1	hypothetical protein DAPPUDRAFT_302769	43.825													mitochondria	mRNA export from nucleus; RNA transport; intracellular transport; RNA localization; RNA export from nucleus; mRNA transport; organic substance transport; nuclear transport; nuclear export; establishment of RNA localization; establishment of localization; cellular localization; organic substance metabolic process; transport; metabolic process; establishment of localization in cell; nucleic acid tr…	organelle; intracellular membrane-bounded organelle; intracellular organelle; nucleus; cell part; intracellular; cytoplasm; intracellular part; membrane-bounded organelle; cell;	organic cyclic compound binding; heterocyclic compound binding; RNA binding; nucleoside phosphate binding; binding; nucleic acid binding; protein binding; nucleotide binding; small molecule binding;	K14284	NXF; nuclear RNA export factor	ko03008 Ribosome biogenesis in eukaryotes; ko03015 mRNA surveillance pathway; ko05164 Influenza A; ko05168 Herpes simplex infection; ko03013 RNA transport;	IPR015245; IPR012677; IPR032675;	Nuclear RNA export factor Tap, RNA-binding domain; Nucleotide-binding alpha-beta plait domain; Leucine-rich repeat domain, L domain-like;
CL186Contig15_orf1	dynamin-1-like protein	76.09		0.895962		1.48951		1.35038		0.49973		0.636614		0.573676	mitochondria			nucleoside phosphate binding; nucleoside binding; ion binding; hydrolase activity, acting on acid anhydrides; hydrolase activity; nucleotide binding; nucleoside-triphosphatase activity; organic cyclic compound binding; heterocyclic compound binding; ribonucleoside binding; carbohydrate derivative binding; pyrophosphatase activity; catalytic activity; ribonucleotide binding; binding; GTPase activi…	K17065	DNM1L; dynamin 1-like protein [EC:3.6.5.5]	ko04214 Apoptosis - fly; ko04621 NOD-like receptor signaling pathway; ko04139 Mitophagy - yeast; ko04668 TNF signaling pathway;	IPR030381; IPR001401; IPR027417; IPR000375;	Dynamin-type guanine nucleotide-binding (G) domain; Dynamin, GTPase domain; P-loop containing nucleoside triphosphate hydrolase; Dynamin central domain;
CL1870Contig3_orf1	tafazzin	24.697	1.10051		0.820046		0.892999		1.29624		0.985858		1.05239		mitochondria	metabolic process; phosphorus metabolic process; single-organism metabolic process; single-organism cellular process; single-organism process; organophosphate metabolic process; cellular lipid metabolic process; phospholipid metabolic process; primary metabolic process; cellular process; cellular metabolic process; phosphate-containing compound metabolic process; lipid metabolic process; organic …		transferase activity, transferring acyl groups; catalytic activity; transferase activity;	K13511	TAZ; monolysocardiolipin acyltransferase [EC:2.3.1.-]	ko00564 Glycerophospholipid metabolism;	IPR002123;	Phospholipid/glycerol acyltransferase;
CL1879Contig1_orf1	Importin-7	103.78	1.07841	1.00461	1.20007	1.15218	1.12726	1.14103	0.843491	0.854538	0.757836	0.855821	0.751687	0.736183	cytosol	establishment of protein localization; transport; intracellular transport; cellular macromolecule localization; establishment of localization in cell; intracellular protein transport; organic substance transport; protein localization; macromolecule localization; cellular protein localization; localization; protein transport; establishment of localization; cellular localization;		small GTPase binding; Ras GTPase binding; binding; protein binding; Ran GTPase binding; GTPase binding; enzyme binding;	K20223	IPO7; importin-7	ko04013 MAPK signaling pathway - fly;	IPR001494; IPR011989; IPR016024;	Importin-beta, N-terminal domain; Armadillo-like helical; Armadillo-type fold;
CL1888Contig4_orf1	MAM and LDL-receptor class A domain-containing protein 1 isoform X1	219.37	1.08443	0.993677	0.66798	0.649005	0.942858	0.919496	1.48982	1.72631	0.798195	0.8146	1.10453	1.21841	nuclear		membrane;	protein binding; binding;				IPR000998; IPR013320;	MAM domain; Concanavalin A-like lectin/glucanase domain;
CL1891Contig3_orf1	Glycoprotein-N-acetylgalactosamine 3-beta-galactosyltransferase 1	49.043	1.02055	0.970346	1.23307	1.12557	1.10985	0.972708	0.783319	0.893059	0.73914	0.820668	0.995762	1.08837	mitochondria		membrane;	transferase activity, transferring glycosyl groups; catalytic activity; transferase activity;	K00731	C1GALT1; glycoprotein-N-acetylgalactosamine 3-beta-galactosyltransferase [EC:2.4.1.122]	ko00512 Mucin type O-glycan biosynthesis; ko01100 Metabolic pathways;
CL18942Contig1_orf1	trypsinogen 2	28.503	1.0537	1.06699	0.662203	0.686833	0.774036	0.783556	1.32155	1.28496	1.17481	1.19421	1.25871	1.24704	extracellular	proteolysis; metabolic process; macromolecule metabolic process; protein metabolic process; primary metabolic process; organic substance metabolic process;		serine-type endopeptidase activity; endopeptidase activity; peptidase activity; catalytic activity; serine hydrolase activity; serine-type peptidase activity; peptidase activity, acting on L-amino acid peptides; hydrolase activity;	K01312	PRSS1_2_3; trypsin [EC:3.4.21.4]	ko04080 Neuroactive ligand-receptor interaction; ko04972 Pancreatic secretion; ko05164 Influenza A; ko04974 Protein digestion and absorption;	IPR009003; IPR001254;	Peptidase S1, PA clan; Serine proteases, trypsin domain;
CL19145Contig1_orf1	cold shock protein domain protein	16.24	1.13218		1.01338		1.11231		1.03116		0.750224		0.889565		nuclear	regulation of cellular process; regulation of gene expression; regulation of transcription, DNA-templated; regulation of cellular biosynthetic process; regulation of primary metabolic process; regulation of macromolecule metabolic process; regulation of nucleobase-containing compound metabolic process; regulation of macromolecule biosynthetic process; regulation of cellular metabolic process; reg…		organic cyclic compound binding; heterocyclic compound binding; DNA binding; binding; nucleic acid binding;				IPR012340; IPR011129; IPR002059;	Nucleic acid-binding, OB-fold; Cold shock protein; Cold-shock protein, DNA-binding;
CL19310Contig1_orf1	JHE-like carboxylesterase 1	29.441	0.928644	0.911227	0.923872	1.1216	1.09505	0.984957	1.04364	1.06013	0.953856	0.992119	1.05465	0.893376	cytosol							IPR029058; IPR002018;	Alpha/Beta hydrolase fold; Carboxylesterase, type B;
CL19427Contig1_orf1	Peroxisomal 3,2-trans-enoyl-CoA isomerase	44.417	1.08002	1.06509	1.05829	1.06065	1.27454	1.25338	0.700616	0.676772	0.831146	0.790364	0.868439	0.829586	mitochondria	metabolic process;		fatty-acyl-CoA binding; catalytic activity; binding; ion binding; anion binding; cofactor binding; sulfur compound binding; coenzyme binding;	K13239	PECI; peroxisomal 3,2-trans-enoyl-CoA isomerase [EC:5.3.3.8]	ko04146 Peroxisome; ko00071 Fatty acid degradation;	IPR029045; IPR000582; IPR014352;	ClpP/crotonase-like domain; Acyl-CoA-binding protein, ACBP; FERM/acyl-CoA-binding protein, 3-helical bundle;
CL19461Contig1_orf1	TPA_inf: alpha1,6 fucosyltransferase	38.481		0.584318		0.885704		2.17312		0.526689		0.448309		0.687638	mitochondria							IPR027350;	Glycosyltransferase family 23 (GT23) domain;
CL1946Contig4_orf1	Alpha-mannosidase 2	136.07	1.07209	1.07102	0.900011	0.906074	0.989426	0.999234	1.06664	1.07732	1.0243	0.996112	1.01376	0.978266	plasma membrane	single-organism carbohydrate metabolic process; metabolic process; single-organism metabolic process; monosaccharide metabolic process; single-organism process; mannose metabolic process; primary metabolic process; carbohydrate metabolic process; organic substance metabolic process; hexose metabolic process;		mannosidase activity; transition metal ion binding; catalytic activity; binding; alpha-mannosidase activity; ion binding; hydrolase activity, acting on glycosyl bonds; cation binding; hydrolase activity, hydrolyzing O-glycosyl compounds; carbohydrate binding; metal ion binding; hydrolase activity; zinc ion binding;	K01231	MAN2; alpha-mannosidase II [EC:3.2.1.114]	ko00513 Various types of N-glycan biosynthesis; ko01100 Metabolic pathways; ko00510 N-Glycan biosynthesis;	IPR027291; IPR028995; IPR000602; IPR015341; IPR011682; IPR011013; IPR011330; IPR013780;	Glycoside hydrolase 38/57, N-terminal domain; Glycoside hydrolase families 57/38, central domain; Glycoside hydrolase family 38, N-terminal domain; Glycoside hydrolase family 38, central domain; Glycosyl hydrolase family 38, C-terminal; Galactose mutarotase-like domain; Glycoside hydrolase/deacetylase, beta/alpha-barrel; Glycosyl hydrolase, all-beta;
CL1947Contig1_orf1	Trans-1,2-dihydrobenzene-1,2-diol dehydrogenase	37.719	0.884414	0.693474	0.571711	0.222658	0.743083	0.72988	0.976599	0.972214	1.80245	2.58318	1.36801	1.46049	mitochondria			catalytic activity; oxidoreductase activity;	K00078	DHDH; dihydrodiol dehydrogenase / D-xylose 1-dehydrogenase (NADP) [EC:1.3.1.20 1.1.1.179]	ko00980 Metabolism of xenobiotics by cytochrome P450; ko00040 Pentose and glucuronate interconversions;	IPR000683; IPR016040;	Oxidoreductase, N-terminal; NAD(P)-binding domain;
CL1947Contig3_orf1	Trans-1,2-dihydrobenzene-1,2-diol dehydrogenase	36.324	0.862246	0.901457	0.810193	0.983119	0.854411	0.978077	0.883969	0.906228	1.59204	1.2144	1.01823	1.04406	cytosol			catalytic activity; oxidoreductase activity;	K00078	DHDH; dihydrodiol dehydrogenase / D-xylose 1-dehydrogenase (NADP) [EC:1.3.1.20 1.1.1.179]	ko00980 Metabolism of xenobiotics by cytochrome P450; ko00040 Pentose and glucuronate interconversions;	IPR000683; IPR016040;	Oxidoreductase, N-terminal; NAD(P)-binding domain;
CL1947Contig4_orf1	Trans-1,2-dihydrobenzene-1,2-diol dehydrogenase	36.977	0.924999	0.850524	0.874169	0.925679	0.814494	0.826886	1.21453	1.20289	1.22105	1.29546	1.16275	1.15332	mitochondria			catalytic activity; oxidoreductase activity;	K00078	DHDH; dihydrodiol dehydrogenase / D-xylose 1-dehydrogenase (NADP) [EC:1.3.1.20 1.1.1.179]	ko00980 Metabolism of xenobiotics by cytochrome P450; ko00040 Pentose and glucuronate interconversions;	IPR000683; IPR016040;	Oxidoreductase, N-terminal; NAD(P)-binding domain;
CL19510Contig1_orf1	10-formyltetrahydrofolate dehydrogenase	98.962	1.10191	1.14249	1.75833	1.65536	0.94438	0.854233	0.523319	0.564288	0.612305	0.644617	0.541645	0.588069	cytosol	dicarboxylic acid metabolic process; alpha-amino acid catabolic process; cellular aromatic compound metabolic process; 10-formyltetrahydrofolate catabolic process; single-organism process; biosynthetic process; cellular metabolic process; organic substance metabolic process; cellular nitrogen compound catabolic process; metabolic process; dicarboxylic acid catabolic process; cellular amino acid m…	intracellular part; cell; cell part; intracellular; cytoplasm;	oxidoreductase activity, acting on the aldehyde or oxo group of donors, NAD or NADP as acceptor; oxidoreductase activity, acting on the CH-NH group of donors; oxidoreductase activity, acting on the CH-NH group of donors, NAD or NADP as acceptor; catalytic activity; oxidoreductase activity, acting on the aldehyde or oxo group of donors; transferase activity, transferring one-carbon groups; formylt…	K00289	E1.5.1.6; formyltetrahydrofolate dehydrogenase [EC:1.5.1.6]	ko00670 One carbon pool by folate;	IPR005793; IPR016161; IPR015590; IPR016162; IPR009081; IPR016163; IPR002376; IPR011034;	Formyl transferase, C-terminal; Aldehyde/histidinol dehydrogenase; Aldehyde dehydrogenase domain; Aldehyde dehydrogenase N-terminal domain; Phosphopantetheine binding ACP domain; Aldehyde dehydrogenase, C-terminal; Formyl transferase, N-terminal; Formyl transferase, C-terminal-like;
CL1953Contig1_orf1	hypothetical protein DAPPUDRAFT_31637, partial	52.284	1.04599		0.847237		1.54574		0.826577		0.691758		0.844888		plasma membrane	metabolic process;		catalytic activity;				IPR017849; IPR017850;	Alkaline phosphatase-like, alpha/beta/alpha; Alkaline-phosphatase-like, core domain;
CL19707Contig1_orf1	copper zinc superoxide dismutase	19.711													extracellular	superoxide metabolic process; metabolic process; reactive oxygen species metabolic process; oxidation-reduction process; single-organism metabolic process; single-organism process; cellular process; cellular metabolic process;		superoxide dismutase activity; catalytic activity; oxidoreductase activity, acting on superoxide radicals as acceptor; binding; ion binding; antioxidant activity; cation binding; metal ion binding; oxidoreductase activity;	K04565	SOD1; superoxide dismutase, Cu-Zn family [EC:1.15.1.1]	ko04146 Peroxisome; ko05020 Prion diseases; ko05014 Amyotrophic lateral sclerosis (ALS); ko05016 Huntington's disease; ko04213 Longevity regulating pathway - multiple species;	IPR001424;	Superoxide dismutase, copper/zinc binding domain;
CL19774Contig1_orf1	mitochondrial amidoxime reducing component 2	36.032	0.833868	0.78772	1.4239	1.52853	1.31394	1.30291	0.689936	0.623135	0.727482	0.626981	0.647951	0.696849	cytosol			organic cyclic compound binding; heterocyclic compound binding; molybdenum ion binding; transition metal ion binding; catalytic activity; binding; ion binding; metal ion binding; cation binding; anion binding; cofactor binding; pyridoxal phosphate binding;				IPR011037; IPR005303; IPR005302;	Pyruvate kinase-like, insert domain; MOSC, N-terminal beta barrel; Molybdenum cofactor sulfurase, C-terminal;
CL19943Contig1_orf1	heparan-alpha-glucosaminide N-acetyltransferase-like isoform X4	70.179	1.02017	0.991457	0.944805	0.993677	1.0646	1.06401	1.08363	1.09477	0.881474	0.814419	1.00337	1.01734	plasma membrane				K10532	HGSNAT; heparan-alpha-glucosaminide N-acetyltransferase [EC:2.3.1.78]	ko00531 Glycosaminoglycan degradation; ko01100 Metabolic pathways; ko04142 Lysosome;	IPR012429;	Domain of unknown function DUF1624;
CL1995Contig2_orf1	GK20284	22.527	1.03432	1.05645	1.06182	1.09397	1.2987	1.34436	0.76103	0.621545	0.997075	0.963638	0.678565	0.613045	cytosol			cation binding; metal ion binding; calcium ion binding; binding; ion binding;				IPR002048; IPR011992;	EF-hand domain; EF-hand domain pair;
CL1997Contig1_orf1	Translin	26.151	0.681576		1.63103		1.56731		0.441666		0.51602		0.580336		cytosol	RNA metabolic process; metabolic process; heterocycle metabolic process; nucleic acid metabolic process; cellular aromatic compound metabolic process; nucleobase-containing compound metabolic process; cellular macromolecule metabolic process; organic cyclic compound metabolic process; nitrogen compound metabolic process; cellular nitrogen compound metabolic process; macromolecule metabolic proces…		organic cyclic compound binding; heterocyclic compound binding; DNA binding; RNA binding; binding; nucleic acid binding; structure-specific DNA binding; single-stranded DNA binding; sequence-specific DNA binding;				IPR016069; IPR016068;	Translin, C-terminal; Translin, N-terminal;
CL19Contig13_orf1	hypothetical protein BRAFLDRAFT_89479	80.226	1.317		1.04529		0.974106		1.02883		0.844796		0.757544		cytosol, nuclear							IPR007111; IPR027417;	NACHT nucleoside triphosphatase; P-loop containing nucleoside triphosphate hydrolase;
CL2008Contig3_orf1	glutathione S-transferase	28.724		0.723285		1.08393		0.74154		0.927392		1.88429		0.796296	cytosol			protein binding; binding;	K00799	GST; glutathione S-transferase [EC:2.5.1.18]	ko00980 Metabolism of xenobiotics by cytochrome P450; ko00982 Drug metabolism - cytochrome P450; ko00480 Glutathione metabolism; ko05204 Chemical carcinogenesis; ko01524 Platinum drug resistance;	IPR004046; IPR010987; IPR012336; IPR004045;	Glutathione S-transferase, C-terminal; Glutathione S-transferase, C-terminal-like; Thioredoxin-like fold; Glutathione S-transferase, N-terminal;
CL2018Contig1_orf1	chitinase 4 precursor	65.203	0.997591	0.988652	0.616767	0.596904	0.879097	0.872864	1.258	1.32999	1.32922	1.37416	1.13173	1.18882	extracellular	glucosamine-containing compound metabolic process; chitin metabolic process; aminoglycan catabolic process; carbohydrate derivative catabolic process; nitrogen compound metabolic process; chitin catabolic process; carbohydrate metabolic process; primary metabolic process; glucosamine-containing compound catabolic process; organic substance metabolic process; organic substance catabolic process; m…	extracellular region;	hydrolase activity, hydrolyzing O-glycosyl compounds; chitin binding; carbohydrate derivative binding; hydrolase activity; chitinase activity; catalytic activity; binding; hydrolase activity, acting on glycosyl bonds;	K01183	E3.2.1.14; chitinase [EC:3.2.1.14]	ko01100 Metabolic pathways; ko00520 Amino sugar and nucleotide sugar metabolism;	IPR001223; IPR029070; IPR011583; IPR002557; IPR017853; IPR013781;	Glycoside hydrolase family 18, catalytic domain; Chitinase insertion domain; Chitinase II; Chitin binding domain; Glycoside hydrolase superfamily; Glycoside hydrolase, catalytic domain;
CL2019Contig1_orf1	proteasome activator complex subunit, putative	224.51	1.08062	1.02632	1.08742	1.13098	1.1025	1.15092	0.749871	0.716718	0.962823	0.89045	0.837609	0.845281	plasma membrane			binding;	K06699	PSME4; proteasome activator subunit 4	ko03050 Proteasome;	IPR032430; IPR011989; IPR016024;	Proteasome activator Blm10, mid region; Armadillo-like helical; Armadillo-type fold;
CL201Contig4_orf1	nuclear cap-binding protein subunit 1	93.02	1.14151	1.13186	1.28071	1.01125	1.12386	0.990745	0.756163	0.775214	0.824407	1.03936	0.76209	0.7961	nuclear	RNA metabolic process; metabolic process; heterocycle metabolic process; nucleic acid metabolic process; cellular aromatic compound metabolic process; nucleobase-containing compound metabolic process; cellular macromolecule metabolic process; organic cyclic compound metabolic process; nitrogen compound metabolic process; cellular nitrogen compound metabolic process; macromolecule metabolic proces…		organic cyclic compound binding; heterocyclic compound binding; RNA binding; protein binding; binding; nucleic acid binding;	K12882	NCBP1; nuclear cap-binding protein subunit 1	ko03040 Spliceosome; ko03015 mRNA surveillance pathway; ko03013 RNA transport;	IPR015174; IPR016024; IPR003890; IPR015172; IPR016021;	MIF4G-like, type 2; Armadillo-type fold; MIF4G-like, type 3; MIF4G-like, type 1; MIF4G-like domain;
CL2024Contig1_orf1	toll-interacting protein	30.819	1.02831		0.862228		0.894487		1.16466		0.892684		1.27086		cytosol			protein binding; binding;	K05402	TOLLIP; toll-interacting protein	ko04620 Toll-like receptor signaling pathway;	IPR003892; IPR009060; IPR000008;	Ubiquitin system component Cue; UBA-like; C2 domain;
CL2027Contig1_orf1	AGAP006918-PA	22.209	0.650047	0.787573	1.7625	1.46628	1.52294	1.31061	0.4023	0.598099	0.479968	0.681533	0.556222	0.671132	mitochondria				K03952	NDUFA8; NADH dehydrogenase (ubiquinone) 1 alpha subcomplex subunit 8	ko05010 Alzheimer's disease; ko00190 Oxidative phosphorylation; ko01100 Metabolic pathways; ko05016 Huntington's disease; ko04932 Non-alcoholic fatty liver disease (NAFLD); ko05012 Parkinson's disease;	IPR010625;	CHCH;
CL2029Contig3_orf1	mitochondrial amidoxime-reducing component 1-like	41.445	0.870447	0.866193	1.22468	1.17349	0.905131	0.745803	1.01258	1.09923	0.949045	1.25764	0.98394	0.959799	plasma membrane			organic cyclic compound binding; heterocyclic compound binding; molybdenum ion binding; transition metal ion binding; catalytic activity; binding; ion binding; metal ion binding; cation binding; anion binding; cofactor binding; pyridoxal phosphate binding;				IPR011037; IPR005303; IPR005302;	Pyruvate kinase-like, insert domain; MOSC, N-terminal beta barrel; Molybdenum cofactor sulfurase, C-terminal;
CL2044Contig2_orf1	hypothetical protein DAPPUDRAFT_319680	37.104	1.05803	1.07607	0.885911	0.878943	1.10049	1.15178	1.15953	1.07106	0.87953	0.926278	0.970414	0.899895	extracellular							IPR016040;	NAD(P)-binding domain;
CL2047Contig1_orf1	uncharacterized protein LOC105326689	52.754	1.27419	1.20837	0.567972	0.75293	1.00293	1.04871	1.32612	1.18439	0.962537	0.869199	1.07185	1.03533	cytosol, mitochondria							IPR003609;	PAN/Apple domain;
CL2047Contig2_orf1	uncharacterized protein LOC101857428	93.249													extracellular
CL2047Contig3_orf1	hypothetical protein X975_08079, partial	114.45													plasma membrane							IPR003609;	PAN/Apple domain;
CL2047Contig4_orf1	hypothetical protein X975_08079, partial	114.88	0.868743	1.04536	0.901659	0.835292	0.807241	0.822678	1.38233	1.34157	1.03751	0.985539	1.17474	1.21571	plasma membrane							IPR003609;	PAN/Apple domain;
CL2047Contig5_orf1	hypothetical protein X975_08079, partial	114.4													plasma membrane							IPR003609;	PAN/Apple domain;
CL2053Contig2_orf1	micorsomal glutathione S-transferase	15.774	0.818547	0.748223	0.967447	1.16382	1.02812	1.01239	1.0203	0.9384	1.15355	1.03696	0.885311	0.950101	extracellular				K00799	GST; glutathione S-transferase [EC:2.5.1.18]	ko00980 Metabolism of xenobiotics by cytochrome P450; ko00982 Drug metabolism - cytochrome P450; ko00480 Glutathione metabolism; ko05204 Chemical carcinogenesis; ko01524 Platinum drug resistance;	IPR023352;	Membrane associated eicosanoid/glutathione metabolism-like domain;
CL2076Contig1_orf1	interleukin enhancer binding factor	26.504													cytosol				K13089			IPR006561;	DZF domain;
CL2086Contig1_orf1	nuclear pore complex protein Nup133-like	128.93	0.797989		1.14524		1.46692		0.808562		0.707142		0.790525		cytosol, nuclear			protein binding; binding;	K14300	NUP133; nuclear pore complex protein Nup133	ko03013 RNA transport;	IPR014908; IPR015943; IPR007187;	Nucleoporin, Nup133/Nup155-like, N-terminal; WD40/YVTN repeat-like-containing domain; Nucleoporin, Nup133/Nup155-like, C-terminal;
CL2089Contig1_orf1	LOW QUALITY PROTEIN: transmembrane 9 superfamily member 1-like	67.86	0.804801	0.99447	0.956778	1.03119	0.778124	1.04798	0.585661	0.660739	0.738677	1.04047	2.19725	1.13194	plasma membrane		intrinsic component of membrane; membrane; integral component of membrane; membrane part;		K17085
CL2098Contig1_orf1	guanine nucleotide exchange factor MSS4	15.285	0.811267	0.802137	1.43861	1.57708	1.19274	1.16146	0.681583	0.585709	0.51854	0.596061	1.03266	0.674552	extracellular	regulation of cellular process; single organism signaling; cellular response to stimulus; signal transduction; regulation of biological process; cell communication; intracellular signal transduction; single-organism cellular process; single-organism process; small GTPase mediated signal transduction; signaling; response to stimulus; cellular process; biological regulation;		molecular function regulator; guanyl-nucleotide exchange factor activity;	K19952			IPR011323; IPR011057;	Mss4/translationally controlled tumour-associated TCTP; Mss4-like;
CL20Contig12_orf1	hypothetical protein DAPPUDRAFT_316477	55.425													plasma membrane	metabolic process;		catalytic activity;				IPR025110; IPR000873;	AMP-binding enzyme C-terminal domain; AMP-dependent synthetase/ligase;
CL20Contig21_orf1	hypothetical protein DAPPUDRAFT_316477	63.112													plasma membrane	metabolic process;		catalytic activity;				IPR025110; IPR000873;	AMP-binding enzyme C-terminal domain; AMP-dependent synthetase/ligase;
CL20Contig7_orf1	hypothetical protein DAPPUDRAFT_328028	64.417	1.3426		1.29645		0.814093		0.546877		0.710067		1.15309		mitochondria	metabolic process;		catalytic activity;				IPR025110; IPR000873;	AMP-binding enzyme C-terminal domain; AMP-dependent synthetase/ligase;
CL21015Contig1_orf1	Integrin alpha-PS2, partial	12.711		0.897522		1.03556		1.08554		0.942498		0.886729		1.08495	cytosol							IPR032695;	Integrin domain;
CL2107Contig2_orf1	hypothetical protein CAPTEDRAFT_195081	489.09													nuclear							IPR001623; IPR003594; IPR007842;	DnaJ domain; Histidine kinase-like ATPase, C-terminal domain; HEPN domain;
CL21110Contig1_orf1	I-connectin	26.191	1.01649	0.935369	0.980637	1.07507	1.1188	1.14416	1.03976	0.960561	0.795875	0.796695	1.06392	0.971758	cytosol			protein binding; binding;				IPR007110; IPR013783; IPR013098;	Immunoglobulin-like domain; Immunoglobulin-like fold; Immunoglobulin I-set;
CL2116Contig1_orf1	G-protein coupled receptor Mth2-like isoform X1	67.545	0.900256	0.89368	1.68019	1.49992	1.03047	0.958762	0.712322	0.880463	0.596439	0.716813	0.7201	0.871193	plasma membrane	G-protein coupled receptor signaling pathway; regulation of cellular process; single organism signaling; cellular response to stimulus; signal transduction; regulation of biological process; cell communication; cell surface receptor signaling pathway; single-organism cellular process; single-organism process; signaling; response to stimulus; cellular process; biological regulation;	intrinsic component of membrane; membrane; integral component of membrane; membrane part;	signaling receptor activity; molecular transducer activity; receptor activity; transmembrane signaling receptor activity; signal transducer activity; G-protein coupled receptor activity;				IPR017981;	GPCR, family 2-like;
CL2121Contig1_orf1	hypothetical protein LOTGIDRAFT_158016	58.603	1.11882	1.22419	0.817894	0.726516	0.658257	0.624528	1.1144	1.21216	1.19473	1.28334	1.33434	1.32002	extracellular	membrane lipid metabolic process; single-organism cellular process; nitrogen compound metabolic process; single-organism process; cellular lipid metabolic process; carbohydrate metabolic process; primary metabolic process; cellular metabolic process; organic substance metabolic process; metabolic process; single-organism metabolic process; sphingolipid metabolic process; cellular process; organon…		hydrolase activity, hydrolyzing O-glycosyl compounds; hydrolase activity; catalytic activity; glucosylceramidase activity; hydrolase activity, acting on glycosyl bonds;	K01201	GBA; glucosylceramidase [EC:3.2.1.45]	ko00511 Other glycan degradation; ko00600 Sphingolipid metabolism; ko01100 Metabolic pathways; ko04142 Lysosome;	IPR033453; IPR013780; IPR033452; IPR017853; IPR013781;	Glycosyl hydrolase family 30, TIM-barrel domain; Glycosyl hydrolase, all-beta; Glycosyl hydrolase family 30, beta sandwich domain; Glycoside hydrolase superfamily; Glycoside hydrolase, catalytic domain;
CL2137Contig2_orf1	phosphatidate phosphatase LPIN3 isoform X4	110.19		0.686458		1.35514		1.42138		0.709163		0.659656		0.705196	nuclear				K15728	LPIN; phosphatidate phosphatase LPIN [EC:3.1.3.4]	ko00564 Glycerophospholipid metabolism; ko01110 Biosynthesis of secondary metabolites; ko00561 Glycerolipid metabolism; ko01100 Metabolic pathways;	IPR013209; IPR031315; IPR007651; IPR031703; IPR023214;	Lipin/Ned1/Smp2 (LNS2); LNS2/PITP; Lipin, N-terminal; Lipin, middle domain; HAD-like domain;
CL213Contig6_orf1	polypeptide N-acetylgalactosaminyltransferase 35A	36.351													endoplasmic reticulum							IPR029044; IPR001173;	Nucleotide-diphospho-sugar transferases; Glycosyltransferase 2-like;
CL2145Contig3_orf1	uncharacterized protein LOC100375173	36.721	1.17014		1.7271		0.867294		0.608637		0.806623		0.494299		cytosol	metabolic process;		transferase activity, transferring acyl groups; catalytic activity; transferase activity; transferase activity, transferring acyl groups other than amino-acyl groups; acetyltransferase activity;
CL2149Contig3_orf1	hypothetical protein DAPPUDRAFT_221441	45.917	0.791747	1.00492	1.42093	1.1165	1.7115	1.10069	0.478021	0.849618	0.527424	0.849062	0.519535	0.927029	extracellular			transferase activity, transferring acyl groups; catalytic activity; transferase activity;	K08766	CPT2; carnitine O-palmitoyltransferase 2 [EC:2.3.1.21]	ko00071 Fatty acid degradation; ko01212 Fatty acid metabolism; ko03320 PPAR signaling pathway;
CL21517Contig1_orf1	hypothetical protein DAPPUDRAFT_230571	20.287	1.05028	1.13307	0.963349	0.97589	1.02759	1.06421	0.942554	0.945967	0.962239	0.877088	1.02731	0.947077	mitochondria	regulation of cellular process; single organism signaling; cellular response to stimulus; signal transduction; regulation of biological process; cell communication; intracellular signal transduction; single-organism cellular process; single-organism process; small GTPase mediated signal transduction; signaling; response to stimulus; cellular process; biological regulation;	cell; intracellular; cell part;	nucleoside phosphate binding; nucleoside binding; ion binding; nucleotide binding; organic cyclic compound binding; heterocyclic compound binding; ribonucleoside binding; carbohydrate derivative binding; ribonucleotide binding; binding; purine ribonucleoside binding; anion binding; purine ribonucleotide binding; purine nucleoside binding; guanyl ribonucleotide binding; guanyl nucleotide binding; …	K07942			IPR005225; IPR027417;	Small GTP-binding protein domain; P-loop containing nucleoside triphosphate hydrolase;
CL21564Contig1_orf1	laminin subunit gamma-1	24.444	0.844593	0.850296	1.49161	1.50308	1.00726	1.01074	0.90475	0.772148	0.679449	0.578362	0.887563	0.804193	extracellular				K05635	LAMC1; laminin, gamma 1	ko04512 ECM-receptor interaction; ko04151 PI3K-Akt signaling pathway; ko05145 Toxoplasmosis; ko05200 Pathways in cancer; ko04510 Focal adhesion; ko05222 Small cell lung cancer; ko05020 Prion diseases; ko05146 Amoebiasis;	IPR000034; IPR002049;	Laminin IV; Laminin EGF domain;
CL215Contig5_orf1	long-chain-fatty-acid--CoA ligase 4 isoform X1	74.557	0.752494	0.767041	0.64739	0.818565	0.804912	1.02433	0.983967	0.747175	1.436	1.22205	1.4787	1.51031	cytosol	metabolic process;		catalytic activity;				IPR000873;	AMP-dependent synthetase/ligase;
CL2170Contig2_orf1	elongation factor 1-delta protein	28.484	0.947575	0.94176	1.27247	1.24594	1.18908	1.18263	0.643494	0.596812	0.803397	0.7701	0.804265	0.790461	mitochondria	translational elongation; cellular protein metabolic process; biosynthetic process; primary metabolic process; cellular metabolic process; organic substance biosynthetic process; cellular biosynthetic process; organic substance metabolic process; metabolic process; cellular macromolecule biosynthetic process; cellular macromolecule metabolic process; gene expression; macromolecule metabolic proce…	cell part; intracellular; cytoplasm; macromolecular complex; intracellular part; protein complex; cell; cytoplasmic part; eukaryotic translation elongation factor 1 complex;	organic cyclic compound binding; heterocyclic compound binding; RNA binding; translation factor activity, nucleic acid binding; translation elongation factor activity; binding; nucleic acid binding;	K15410	EEF1D; elongation factor 1-delta	ko05168 Herpes simplex infection;	IPR014717; IPR014038; IPR018940;	Translation elongation factor EF1B/ribosomal protein S6; Translation elongation factor EF1B, beta/delta subunit, guanine nucleotide exchange domain; Elongation factor 1 beta central acidic region, eukaryote;
CL21747Contig1_orf1	hemolectin	18.813	1.06996	1.00205	1.1084	1.12537	0.982411	0.956865	1.03221	1.0058	0.813781	0.777428	0.941326	0.958277	extracellular
CL2184Contig2_orf1	RANBP2-like and GRIP domain-containing protein 5/6	316.75	1.03972		0.816489		0.819946		1.28225		1.01328		1.21149		mitochondria	transport; intracellular transport; establishment of localization in cell; localization; establishment of localization; cellular localization;		cation binding; metal ion binding; protein binding; zinc ion binding; transition metal ion binding; binding; ion binding;	K12172	RANBP2; E3 SUMO-protein ligase RanBP2	ko03013 RNA transport;	IPR000156; IPR011990; IPR011993; IPR013026; IPR001876;	Ran binding domain; Tetratricopeptide-like helical domain; PH domain-like; Tetratricopeptide repeat-containing domain; Zinc finger, RanBP2-type;
CL2188Contig1_orf1	cartilage acidic protein 1-like	60.624		0.706472		1.39908		1.22952		1.047		0.752085		0.544762	extracellular							IPR011519;	ASPIC/UnbV;
CL2189Contig5_orf1	nitrilase	34.235	0.97789	0.939874	1.40402	1.17481	1.18661	1.21741	0.739925	0.734545	0.642841	0.634995	0.746659	0.787729	cytosol	nitrogen compound metabolic process; metabolic process;		hydrolase activity; catalytic activity; hydrolase activity, acting on carbon-nitrogen (but not peptide) bonds;				IPR003010;	Carbon-nitrogen hydrolase;
CL21902Contig1_orf1	ubiquitin-40S ribosomal protein S27a-like	9.1757	0.952927		1.24041		1.18693		0.674826		0.862215		0.860021		extracellular	cellular protein metabolic process; biosynthetic process; primary metabolic process; cellular metabolic process; organic substance biosynthetic process; cellular biosynthetic process; organic substance metabolic process; metabolic process; cellular macromolecule biosynthetic process; cellular macromolecule metabolic process; gene expression; macromolecule metabolic process; protein metabolic proc…	ribosome; organelle; intracellular organelle; intracellular non-membrane-bounded organelle; cell part; intracellular; cytoplasm; macromolecular complex; intracellular part; cell; ribonucleoprotein complex; cytoplasmic part; non-membrane-bounded organelle;	structural constituent of ribosome; structural molecule activity;				IPR002906; IPR011332;	Ribosomal protein S27a; Zinc-binding ribosomal protein;
CL21930Contig1_orf1	I-connectin	19.685	0.884656	0.935371	1.28353	1.02389	1.21404	1.18686	0.815168	0.967223	0.645573	0.724719	0.90951	1.00028	cytosol			protein binding; binding;				IPR003598; IPR007110; IPR013783; IPR003599; IPR013098;	Immunoglobulin subtype 2; Immunoglobulin-like domain; Immunoglobulin-like fold; Immunoglobulin subtype; Immunoglobulin I-set;
CL2195Contig3_orf1	Zinc finger FYVE domain-containing protein 9, partial	154.12													nuclear			metal ion binding; cation binding; binding; ion binding;	K04679	MADHIP; MAD, mothers against decapentaplegic interacting protein	ko04350 TGF-beta signaling pathway; ko04144 Endocytosis;	IPR024608; IPR000306; IPR017455; IPR013083; IPR022557; IPR011011;	Smad anchor for receptor activation, Smad-binding domain; FYVE zinc finger; Zinc finger, FYVE-related; Zinc finger, RING/FYVE/PHD-type; Domain of unknown function DUF3480; Zinc finger, FYVE/PHD-type;
CL2199Contig3_orf1	ubiquitin conjugation factor E4 B isoform X1	124.55	0.930058		1.26514		1.20483		0.761279		0.8034		0.801142		nuclear	modification-dependent macromolecule catabolic process; cellular macromolecule catabolic process; proteolysis involved in cellular protein catabolic process; cellular protein catabolic process; protein ubiquitination; modification-dependent protein catabolic process; cellular protein metabolic process; ubiquitin-dependent protein catabolic process; protein modification by small protein conjugatio…	catalytic complex; cell part; intracellular; macromolecular complex; intracellular part; transferase complex; protein complex; ubiquitin ligase complex; cell;	ubiquitin-ubiquitin ligase activity; ubiquitin protein ligase activity; ubiquitin-like protein ligase activity; ubiquitin-like protein transferase activity; catalytic activity; transferase activity; ubiquitin-protein transferase activity;	K10597	UBE4B; ubiquitin conjugation factor E4 B [EC:2.3.2.27]	ko04141 Protein processing in endoplasmic reticulum; ko04120 Ubiquitin mediated proteolysis;	IPR019474; IPR003613; IPR013083;	Ubiquitin conjugation factor E4, core; U box domain; Zinc finger, RING/FYVE/PHD-type;
[truncated: 2,752 more rows]
